# Supplementary material
Source: PubMed Central journal article supplement (PMC1450138)

Appendix 1: This neighbor-joining tree of genetic distance (K2P) contains the 625 *Belvosia* specimens that produced a sequence greater than 500 bp. Each fly is from a different caterpillar, thereby minimizing the chance that any two flies are siblings. For each specimen, we report host species, sequence length, and fly voucher codes as used at <http://www.bold.org> (project: ACG *Belvosia*; HCICxxxxxx) and <http://janzen.sas.upenn.edu> (DHJPArxxxxxx)".

# BOLD TaxonID Tree

Project : ACG Belvosia[HCIC]  
Date : 30-December-2005  
Data Type : Nucleotide  
Distance Model : Kimura 2 Parameter  
Codon Positions : 1st, 2nd, 3rd  
Labels : Extra Info, SampleID, ProcessID, Sequence Length,  
Colorization :  
  
Sequence Count : 625  
Species count : 32  
Genus count : 1  
Family count : 1  
Unidentified : 0

Belvosia Woodley09|HCIC019-05|DHJPAR0001192|Eacles Janzen02|614bp  
 Belvosia Woodley09|HCIC430-05|DHJPAR0001914|Eacles Janzen02|658bp  
 Belvosia Woodley09|HCIC428-05|DHJPAR0001912|Eacles Janzen02|627bp  
 Belvosia Woodley09|HCIC432-05|DHJPAR0001916|Eacles Janzen02|641bp  
 Belvosia Woodley09|HCIC437-05|DHJPAR0001921|Eacles Janzen02|657bp  
 Belvosia Woodley09|HCIC443-05|DHJPAR0001927|Eacles Janzen02|658bp  
 Belvosia Woodley09|HCIC442-05|DHJPAR0001926|Eacles Janzen02|658bp  
 Belvosia Woodley09|HCIC441-05|DHJPAR0001925|Eacles Janzen02|658bp  
 Belvosia Woodley09|HCIC429-05|DHJPAR0001913|Eacles Janzen02|658bp  
 Belvosia Woodley09|HCIC427-05|DHJPAR0001911|Eacles Janzen02|658bp  
 Belvosia Woodley09|HCIC092-05|DHJPAR0001189|Eacles Janzen02|662bp  
 Belvosia Woodley09|HCIC011-05|DHJPAR0001191|Eacles Janzen02|580bp  
 Belvosia Woodley09|HCIC043-05|DHJPAR0001195|Eacles Janzen02|561bp  
 Belvosia Woodley09|HCIC051-05|DHJPAR0001196|Eacles Janzen02|564bp  
 Belvosia Woodley09|HCIC100-05|DHJPAR0001190|Eacles Janzen02|613bp  
 Belvosia Woodley09|HCIC067-05|DHJPAR0001198|Eacles Janzen02|626bp  
 Belvosia Woodley09|HCIC431-05|DHJPAR0001915|Eacles Janzen02|658bp  
 Belvosia Woodley09|HCIC439-05|DHJPAR0001923|Eacles Janzen02|657bp  
 Belvosia Woodley09|HCIC433-05|DHJPAR0001917|Eacles Janzen02|658bp  
 Belvosia Woodley09|HCIC435-05|DHJPAR0001919|Eacles Janzen02|658bp  
 Belvosia Woodley09|HCIC436-05|DHJPAR0001920|Eacles Janzen02|658bp  
 Belvosia Woodley09|HCIC438-05|DHJPAR0001922|Eacles Janzen02|658bp  
 Belvosia Woodley09|HCIC444-05|DHJPAR0001928|Eacles Janzen02|658bp  
 Belvosia Woodley09|HCIC446-05|DHJPAR0001930|Eacles Janzen02|579bp  
 Belvosia Woodley10|HCIC120-05|DHJPAR0001204|Citheronia lobesis|662bp  
 Belvosia Woodley10|HCIC415-05|DHJPAR0001899|Citheronia lobesis|559bp  
 Belvosia Woodley10|HCIC409-05|DHJPAR0001893|Citheronia lobesis|582bp  
 Belvosia Woodley10|HCIC099-05|DHJPAR0001202|Citheronia lobesis|624bp  
 Belvosia Woodley10|HCIC091-05|DHJPAR0001201|Citheronia lobesis|530bp  
 Belvosia Woodley10|HCIC112-05|DHJPAR0001203|Citheronia lobesis|638bp  
 Belvosia Woodley10|HCIC413-05|DHJPAR0001897|Citheronia lobesis|554bp  
 Belvosia Woodley10|HCIC411-05|DHJPAR0001895|Citheronia lobesis|656bp  
 Belvosia Woodley10|HCIC412-05|DHJPAR0001896|Citheronia lobesis|566bp  
 Belvosia Woodley10|HCIC128-05|DHJPAR0001205|Citheronia lobesis|662bp  
 Belvosia Woodley10|HCIC083-05|DHJPAR0001200|Citheronia lobesis|662bp  
 Belvosia Woodley10|HCIC416-05|DHJPAR0001900|Citheronia lobesis|658bp  
 Belvosia Woodley10|HCIC410-05|DHJPAR0001894|Citheronia lobesis|658bp  
 Belvosia Woodley10|HCIC407-05|DHJPAR0001891|Citheronia lobesis|635bp  
 Belvosia Woodley10|HCIC408-05|DHJPAR0001892|Citheronia lobesis|655bp  
 Belvosia Woodley10|HCIC417-05|DHJPAR0001901|Citheronia lobesis|656bp  
 Belvosia Woodley10|HCIC418-05|DHJPAR0001902|Citheronia lobesis|658bp  
 Belvosia Woodley10|HCIC419-05|DHJPAR0001903|Citheronia lobesis|658bp  
 Belvosia Woodley10|HCIC422-05|DHJPAR0001906|Citheronia lobesis|658bp  
 Belvosia Woodley04A|HCIC664-05|DHJPAR0002149|Enyo ocypete|606bp  
 Belvosia Woodley04A|HCIC717-05|DHJPAR0003613|Enyo ocypete|626bp  
 Belvosia Woodley04A|HCIC730-05|DHJPAR0003626|Enyo ocypete|626bp  
 Belvosia Woodley04A|HCIC731-05|DHJPAR0003627|Enyo ocypete|626bp  
 Belvosia Woodley04A|HCIC735-05|DHJPAR0003631|Enyo ocypete|626bp  
 Belvosia Woodley04A|HCIC736-05|DHJPAR0003632|Enyo ocypete|626bp  
 Belvosia Woodley04A|HCIC740-05|DHJPAR0003636|Enyo ocypete|626bp  
 Belvosia Woodley04A|HCIC741-05|DHJPAR0003637|Enyo ocypete|626bp  
 Belvosia Woodley04A|HCIC568-05|DHJPAR0002052|Enyo ocypete|603bp  
 Belvosia Woodley04A|HCIC654-05|DHJPAR0002139|Enyo ocypete|636bp  
 Belvosia Woodley04A|HCIC653-05|DHJPAR0002138|Enyo ocypete|636bp  
 Belvosia Woodley04A|HCIC651-05|DHJPAR0002136|Enyo ocypete|636bp  
 Belvosia Woodley04A|HCIC650-05|DHJPAR0002135|Enyo ocypete|636bp  
 Belvosia Woodley04A|HCIC648-05|DHJPAR0002133|Enyo ocypete|636bp  
 Belvosia Woodley04A|HCIC644-05|DHJPAR0002129|Enyo ocypete|636bp  
 Belvosia Woodley04A|HCIC641-05|DHJPAR0002126|Enyo ocypete|636bp  
 Belvosia Woodley04A|HCIC639-05|DHJPAR0002124|Enyo ocypete|636bp  
 Belvosia Woodley04A|HCIC638-05|DHJPAR0002123|Enyo ocypete|636bp  
 Belvosia Woodley04A|HCIC637-05|DHJPAR0002122|Enyo ocypete|636bp  
 Belvosia Woodley04A|HCIC636-05|DHJPAR0002121|Enyo ocypete|636bp  
 Belvosia Woodley04A|HCIC634-05|DHJPAR0002119|Enyo ocypete|636bp  
 Belvosia Woodley04A|HCIC630-05|DHJPAR0002115|Enyo ocypete|636bp  
 Belvosia Woodley04A|HCIC627-05|DHJPAR0002112|Enyo ocypete|636bp  
 Belvosia Woodley04A|HCIC624-05|DHJPAR0002109|Enyo ocypete|636bp  
 Belvosia Woodley04A|HCIC617-05|DHJPAR0002102|Enyo ocypete|636bp  
 Belvosia Woodley04A|HCIC615-05|DHJPAR0002100|Enyo ocypete|636bp  
 Belvosia Woodley04A|HCIC612-05|DHJPAR0002097|Enyo ocypete|636bp  
 Belvosia Woodley04A|HCIC600-05|DHJPAR0002085|Enyo ocypete|636bp  
 Belvosia Woodley04A|HCIC593-05|DHJPAR0002078|Enyo ocypete|636bp  
 Belvosia Woodley04A|HCIC579-05|DHJPAR0002064|Enyo ocypete|636bp  
 Belvosia Woodley04A|HCIC687-05|DHJPAR0003583|Enyo ocypete|625bp  
 Belvosia Woodley04A|HCIC690-05|DHJPAR0003586|Enyo ocypete|625bp  
 Belvosia Woodley04A|HCIC709-05|DHJPAR0003605|Enyo ocypete|625bp  
 Belvosia Woodley04A|HCIC715-05|DHJPAR0003611|Enyo ocypete|625bp  
 Belvosia Woodley04A|HCIC605-05|DHJPAR0002090|Enyo ocypete|610bp  
 Belvosia Woodley04A|HCIC606-05|DHJPAR0002091|Enyo ocypete|610bp  
 Belvosia Woodley04A|HCIC716-05|DHJPAR0003612|Enyo ocypete|625bp  
 Belvosia Woodley04A|HCIC718-05|DHJPAR0003614|Enyo ocypete|625bp  
 Belvosia Woodley04A|HCIC720-05|DHJPAR0003616|Enyo ocypete|625bp  
 Belvosia Woodley04A|HCIC722-05|DHJPAR0003618|Unzela pronoe|625bp  
 Belvosia Woodley04A|HCIC255-05|DHJPAR0001737|Enyo ocypete|592bp  
 Belvosia Woodley04A|HCIC713-05|DHJPAR0003609|Enyo ocypete|624bp  
 Belvosia Woodley04A|HCIC260-05|DHJPAR0001742|Enyo ocypete|609bp  
 Belvosia Woodley04A|HCIC723-05|DHJPAR0003619|Enyo ocypete|621bp  
 Belvosia Woodley04A|HCIC320-05|DHJPAR0001804|Enyo ocypete|624bp  
 Belvosia Woodley04A|HCIC726-05|DHJPAR0003622|Unzela japix|624bp

|          |            |            |               |               |         |       |
|----------|------------|------------|---------------|---------------|---------|-------|
| Belvosia | Woodley04A | HCIC725-05 | DHJPAR0003621 | Enyo          | ocypete | 622bp |
| Belvosia | Woodley04A | HCIC320-05 | DHJPAR0001804 | Enyo          | ocypete | 624bp |
| Belvosia | Woodley04A | HCIC726-05 | DHJPAR0003622 | Unzela japix  |         | 624bp |
| Belvosia | Woodley04A | HCIC323-05 | DHJPAR0001807 | Enyo          | ocypete | 621bp |
| Belvosia | Woodley04A | HCIC708-05 | DHJPAR0003604 | Enyo          | ocypete | 623bp |
| Belvosia | Woodley04A | HCIC738-05 | DHJPAR0003634 | Enyo          | ocypete | 626bp |
| Belvosia | Woodley04A | HCIC755-05 | DHJPAR0003651 | Enyo          | ocypete | 575bp |
| Belvosia | Woodley04A | HCIC261-05 | DHJPAR0001743 | Enyo          | ocypete | 598bp |
| Belvosia | Woodley04A | HCIC711-05 | DHJPAR0003607 | Enyo          | ocypete | 626bp |
| Belvosia | Woodley04A | HCIC725-05 | DHJPAR0003621 | Unzela japix  |         | 622bp |
| Belvosia | Woodley04A | HCIC577-05 | DHJPAR0002062 | Enyo          | ocypete | 557bp |
| Belvosia | Woodley04A | HCIC578-05 | DHJPAR0002063 | Enyo          | ocypete | 610bp |
| Belvosia | Woodley04A | HCIC584-05 | DHJPAR0002069 | Enyo          | ocypete | 543bp |
| Belvosia | Woodley04A | HCIC710-05 | DHJPAR0003606 | Enyo          | ocypete | 625bp |
| Belvosia | Woodley04A | HCIC643-05 | DHJPAR0002128 | Enyo          | ocypete | 610bp |
| Belvosia | Woodley04A | HCIC658-05 | DHJPAR0002143 | Enyo          | ocypete | 632bp |
| Belvosia | Woodley04A | HCIC163-05 | DHJPAR0001268 | Unzela japix  |         | 662bp |
| Belvosia | Woodley04A | HCIC155-05 | DHJPAR0001267 | Enyo          | ocypete | 662bp |
| Belvosia | Woodley04A | HCIC567-05 | DHJPAR0002051 | Enyo          | ocypete | 658bp |
| Belvosia | Woodley04A | HCIC547-05 | DHJPAR0002031 | Unzela japix  |         | 658bp |
| Belvosia | Woodley04A | HCIC531-05 | DHJPAR0002015 | Unzela japix  |         | 658bp |
| Belvosia | Woodley04A | HCIC262-05 | DHJPAR0001744 | Enyo          | ocypete | 658bp |
| Belvosia | Woodley04A | HCIC259-05 | DHJPAR0001741 | Enyo          | ocypete | 658bp |
| Belvosia | Woodley04A | HCIC257-05 | DHJPAR0001739 | Enyo          | ocypete | 658bp |
| Belvosia | Woodley04A | HCIC256-05 | DHJPAR0001738 | Enyo          | ocypete | 658bp |
| Belvosia | Woodley04A | HCIC553-05 | DHJPAR0002037 | Unzela pronoe |         | 658bp |
| Belvosia | Woodley04A | HCIC625-05 | DHJPAR0002110 | Enyo          | ocypete | 658bp |
| Belvosia | Woodley04A | HCIC245-05 | DHJPAR0001727 | Enyo          | ocypete | 658bp |
| Belvosia | Woodley04A | HCIC635-05 | DHJPAR0002120 | Enyo          | ocypete | 658bp |
| Belvosia | Woodley04A | HCIC640-05 | DHJPAR0002125 | Enyo          | ocypete | 636bp |
| Belvosia | Woodley04A | HCIC628-05 | DHJPAR0002113 | Enyo          | ocypete | 636bp |
| Belvosia | Woodley04A | HCIC620-05 | DHJPAR0002105 | Enyo          | ocypete | 636bp |
| Belvosia | Woodley04A | HCIC550-05 | DHJPAR0002034 | Enyo          | ocypete | 632bp |
| Belvosia | Woodley04A | HCIC629-05 | DHJPAR0002114 | Enyo          | ocypete | 631bp |
| Belvosia | Woodley04A | HCIC237-05 | DHJPAR0001719 | Enyo          | ocypete | 625bp |
| Belvosia | Woodley04A | HCIC724-05 | DHJPAR0003620 | Enyo          | ocypete | 625bp |
| Belvosia | Woodley04A | HCIC727-05 | DHJPAR0003623 | Enyo          | ocypete | 626bp |
| Belvosia | Woodley04A | HCIC631-05 | DHJPAR0002116 | Enyo          | ocypete | 610bp |
| Belvosia | Woodley04A | HCIC607-05 | DHJPAR0002092 | Enyo          | ocypete | 605bp |
| Belvosia | Woodley04A | HCIC611-05 | DHJPAR0002096 | Enyo          | ocypete | 574bp |
| Belvosia | Woodley04A | HCIC657-05 | DHJPAR0002142 | Enyo          | ocypete | 601bp |
| Belvosia | Woodley04A | HCIC660-05 | DHJPAR0002145 | Enyo          | ocypete | 617bp |
| Belvosia | Woodley04A | HCIC661-05 | DHJPAR0002146 | Enyo          | ocypete | 637bp |
| Belvosia | Woodley04A | HCIC564-05 | DHJPAR0002048 | Enyo          | ocypete | 658bp |
| Belvosia | Woodley04A | HCIC526-05 | DHJPAR0002010 | Unzela pronoe |         | 624bp |
| Belvosia | Woodley04A | HCIC248-05 | DHJPAR0001730 | Enyo          | ocypete | 590bp |
| Belvosia | Woodley04A | HCIC236-05 | DHJPAR0001718 | Enyo          | ocypete | 592bp |
| Belvosia | Woodley04A | HCIC251-05 | DHJPAR0001733 | Enyo          | ocypete | 658bp |
| Belvosia | Woodley04A | HCIC574-05 | DHJPAR0002059 | Enyo          | ocypete | 574bp |
| Belvosia | Woodley04A | HCIC632-05 | DHJPAR0002117 | Enyo          | ocypete | 606bp |
| Belvosia | Woodley04A | HCIC662-05 | DHJPAR0002147 | Enyo          | ocypete | 624bp |
| Belvosia | Woodley04A | HCIC565-05 | DHJPAR0002049 | Enyo          | ocypete | 632bp |
| Belvosia | Woodley04A | HCIC552-05 | DHJPAR0002036 | Aleuron iphis |         | 638bp |
| Belvosia | Woodley04A | HCIC551-05 | DHJPAR0002035 | Aleuron iphis |         | 632bp |
| Belvosia | Woodley04A | HCIC541-05 | DHJPAR0002025 | Enyo          | ocypete | 632bp |
| Belvosia | Woodley04A | HCIC528-05 | DHJPAR0002012 | Unzela japix  |         | 641bp |
| Belvosia | Woodley04A | HCIC530-05 | DHJPAR0002014 | Unzela japix  |         | 632bp |
| Belvosia | Woodley04A | HCIC614-05 | DHJPAR0002099 | Enyo          | ocypete | 627bp |
| Belvosia | Woodley04A | HCIC581-05 | DHJPAR0002066 | Enyo          | ocypete | 633bp |
| Belvosia | Woodley04A | HCIC623-05 | DHJPAR0002108 | Enyo          | ocypete | 629bp |
| Belvosia | Woodley04A | HCIC566-05 | DHJPAR0002050 | Enyo          | ocypete | 632bp |
| Belvosia | Woodley04A | HCIC571-05 | DHJPAR0002055 | Enyo          | ocypete | 632bp |
| Belvosia | Woodley04A | HCIC590-05 | DHJPAR0002075 | Enyo          | ocypete | 635bp |
| Belvosia | Woodley04A | HCIC649-05 | DHJPAR0002134 | Enyo          | ocypete | 636bp |
| Belvosia | Woodley04A | HCIC663-05 | DHJPAR0002148 | Enyo          | ocypete | 631bp |
| Belvosia | Woodley04A | HCIC601-05 | DHJPAR0002086 | Enyo          | ocypete | 631bp |
| Belvosia | Woodley04A | HCIC575-05 | DHJPAR0002060 | Enyo          | ocypete | 624bp |
| Belvosia | Woodley04A | HCIC652-05 | DHJPAR0002137 | Enyo          | ocypete | 635bp |
| Belvosia | Woodley04A | HCIC588-05 | DHJPAR0002073 | Enyo          | ocypete | 624bp |
| Belvosia | Woodley04A | HCIC576-05 | DHJPAR0002061 | Enyo          | ocypete | 552bp |
| Belvosia | Woodley04A | HCIC665-05 | DHJPAR0002150 | Enyo          | ocypete | 595bp |
| Belvosia | Woodley04A | HCIC591-05 | DHJPAR0002076 | Enyo          | ocypete | 577bp |
| Belvosia | Woodley04A | HCIC659-05 | DHJPAR0002144 | Enyo          | ocypete | 598bp |
| Belvosia | Woodley04A | HCIC666-05 | DHJPAR0002151 | Enyo          | ocypete | 551bp |
| Belvosia | Woodley04C | HCIC532-05 | DHJPAR0002016 | Unzela japix  |         | 597bp |
| Belvosia | Woodley04A | HCIC603-05 | DHJPAR0002088 | Enyo          | ocypete | 613bp |
| Belvosia | Woodley04A | HCIC589-05 | DHJPAR0002074 | Enyo          | ocypete | 632bp |
| Belvosia | Woodley04A | HCIC583-05 | DHJPAR0002068 | Enyo          | ocypete | 635bp |
| Belvosia | Woodley04B | HCIC332-05 | DHJPAR0001816 | Enyo          | ocypete | 598bp |
| Belvosia | Woodley04B | HCIC244-05 | DHJPAR0001726 | Enyo          | ocypete | 658bp |
| Belvosia | Woodley04B | HCIC239-05 | DHJPAR0001721 | Enyo          | ocypete | 585bp |
| Belvosia | Woodley04B | HCIC316-05 | DHJPAR0001800 | Enyo          | ocypete | 632bp |
| Belvosia | Woodley04B | HCIC756-05 | DHJPAR0003652 | Enyo          | ocypete | 624bp |
| Belvosia | Woodley04B | HCIC757-05 | DHJPAR0003653 | Enyo          | ocypete | 624bp |
| Belvosia | Woodley04B | HCIC241-05 | DHJPAR0001723 | Enyo          | ocypete | 625bp |
| Belvosia | Woodley04B | HCIC760-05 | DHJPAR0003656 | Enyo          | ocypete | 624bp |
| Belvosia | Woodley04B | HCIC238-05 | DHJPAR0001720 | Enyo          | ocypete | 626bp |
| Belvosia | Woodley04B | HCIC754-05 | DHJPAR0003650 | Enyo          | ocypete | 626bp |
| Belvosia | Woodley04B | HCIC752-05 | DHJPAR0003648 | Enyo          | ocypete | 625bp |
| Belvosia | Woodley04B | HCIC753-05 | DHJPAR0003649 | Enyo          | ocypete | 625bp |
| Belvosia | Woodley04B | HCIC751-05 | DHJPAR0003647 | Enyo          | ocypete | 624bp |
| Belvosia | Woodley04B | HCIC758-05 | DHJPAR0003654 | Enyo          | ocypete | 625bp |
| Belvosia | Woodley04B | HCIC240-05 | DHJPAR0001722 | Enyo          | ocypete | 631bp |

Belvosia Woodley04B|HCIC751-05|DHJPAR000364|Enyo ocypte|624bp  
 Belvosia Woodley04B|HCIC758-05|DHJPAR0003654|Enyo ocypte|625bp  
 Belvosia Woodley04B|HCIC240-05|DHJPAR0001722|Enyo ocypte|631bp  
 Belvosia Woodley04B|HCIC331-05|DHJPAR0001815|Enyo lugubris|623bp  
 Belvosia Woodley04B|HCIC580-05|DHJPAR0002065|Enyo ocypte|636bp  
 Belvosia Woodley04B|HCIC602-05|DHJPAR0002087|Enyo ocypte|658bp  
 Belvosia Woodley04B|HCIC616-05|DHJPAR0002101|Enyo ocypte|636bp  
 Belvosia Woodley04B|HCIC647-05|DHJPAR0002132|Enyo ocypte|549bp  
 Belvosia Woodley04B|HCIC342-05|DHJPAR0001826|Enyo ocypte|624bp  
 Belvosia Woodley04B|HCIC594-05|DHJPAR0002079|Enyo ocypte|636bp  
 Belvosia Woodley04B|HCIC592-05|DHJPAR0002077|Enyo ocypte|658bp  
 Belvosia Woodley04B|HCIC572-05|DHJPAR0002056|Enyo ocypte|658bp  
 Belvosia Woodley04B|HCIC570-05|DHJPAR0002054|Enyo ocypte|658bp  
 Belvosia Woodley04B|HCIC562-05|DHJPAR0002046|data not yet available [2005 record]|658bp  
 Belvosia Woodley04B|HCIC252-05|DHJPAR0001734|Enyo lugubris|658bp  
 Belvosia Woodley04B|HCIC733-05|DHJPAR0003629|Enyo ocypte|625bp  
 Belvosia Woodley04B|HCIC187-05|DHJPAR0001271|Enyo ocypte|662bp  
 Belvosia Woodley04B|HCIC246-05|DHJPAR0001728|Enyo ocypte|570bp  
 Belvosia Woodley04B|HCIC706-05|DHJPAR0003602|Enyo ocypte|624bp  
 Belvosia Woodley04B|HCIC001-04|DHJPAR0001103|Enyo ocypte|645bp  
 Belvosia Woodley04B|HCIC315-05|DHJPAR0001799|Enyo ocypte|620bp  
 Belvosia Woodley04B|HCIC339-05|DHJPAR0001823|Enyo ocypte|623bp  
 Belvosia Woodley04B|HCIC595-05|DHJPAR0002080|Enyo ocypte|610bp  
 Belvosia Woodley04B|HCIC656-05|DHJPAR0002141|Enyo ocypte|601bp  
 Belvosia Woodley04B|HCIC249-05|DHJPAR0001731|Enyo ocypte|606bp  
 Belvosia Woodley04B|HCIC250-05|DHJPAR0001732|Enyo ocypte|608bp  
 Belvosia Woodley04B|HCIC563-05|DHJPAR0002047|data not yet available [2005 record]|658bp  
 Belvosia Woodley04B|HCIC253-05|DHJPAR0001735|Enyo lugubris|595bp  
 Belvosia Woodley04B|HCIC759-05|DHJPAR0003655|Enyo ocypte|623bp  
 Belvosia Woodley04B|HCIC732-05|DHJPAR0003628|Enyo ocypte|624bp  
 Belvosia Woodley04B|HCIC322-05|DHJPAR0001806|Enyo ocypte|623bp  
 Belvosia Woodley04B|HCIC728-05|DHJPAR0003624|Unzela japix|626bp  
 Belvosia Woodley04B|HCIC737-05|DHJPAR0003633|Enyo ocypte|624bp  
 Belvosia Woodley04B|HCIC569-05|DHJPAR0002053|Enyo ocypte|606bp  
 Belvosia Woodley04B|HCIC618-05|DHJPAR0002103|Enyo ocypte|636bp  
 Belvosia Woodley04B|HCIC534-05|DHJPAR0002018|Unzela japix|576bp  
 Belvosia Woodley04B|HCIC582-05|DHJPAR0002067|Enyo ocypte|609bp  
 Belvosia Woodley04B|HCIC667-05|DHJPAR0002152|Enyo ocypte|609bp  
 Belvosia Woodley04C|HCIC104-05|DHJPAR0001142|Unzela japix|562bp  
 Belvosia Woodley04C|HCIC340-05|DHJPAR0001824|Aleuron iphis|618bp  
 Belvosia Woodley04C|HCIC529-05|DHJPAR0002013|Unzela japix|633bp  
 Belvosia Woodley04C|HCIC544-05|DHJPAR0002028|Unzela japix|633bp  
 Belvosia Woodley04C|HCIC537-05|DHJPAR0002021|Unzela japix|621bp  
 Belvosia Woodley04C|HCIC096-05|DHJPAR0001141|Unzela japix|662bp  
 Belvosia Woodley04C|HCIC195-05|DHJPAR0001272|Unzela japix|662bp  
 Belvosia Woodley04C|HCIC055-05|DHJPAR0001148|Unzela japix|662bp  
 Belvosia Woodley04C|HCIC088-05|DHJPAR0001140|Unzela japix|662bp  
 Belvosia Woodley04C|HCIC047-05|DHJPAR0001147|Unzela japix|662bp  
 Belvosia Woodley04C|HCIC039-05|DHJPAR0001146|Unzela japix|662bp  
 Belvosia Woodley04C|HCIC031-05|DHJPAR0001145|Unzela japix|662bp  
 Belvosia Woodley04C|HCIC023-05|DHJPAR0001144|Unzela japix|662bp  
 Belvosia Woodley04C|HCIC015-05|DHJPAR0001143|Unzela japix|662bp  
 Belvosia Woodley04C|HCIC542-05|DHJPAR0002026|Unzela japix|658bp  
 Belvosia Woodley04C|HCIC533-05|DHJPAR0002017|Unzela japix|658bp  
 Belvosia Woodley04C|HCIC527-05|DHJPAR0002011|Unzela japix|658bp  
 Belvosia Woodley04C|HCIC525-05|DHJPAR0002009|Unzela japix|658bp  
 Belvosia Woodley04C|HCIC523-05|DHJPAR0002007|Unzela japix|658bp  
 Belvosia Woodley04C|HCIC520-05|DHJPAR0002004|Unzela japix|658bp  
 Belvosia Woodley04C|HCIC535-05|DHJPAR0002019|Unzela japix|641bp  
 Belvosia Woodley04C|HCIC536-05|DHJPAR0002020|Unzela japix|639bp  
 Belvosia Woodley04C|HCIC330-05|DHJPAR0001814|Unzela japix|643bp  
 Belvosia Woodley04C|HCIC004-04|DHJPAR0001104|Unzela japix|636bp  
 Belvosia Woodley04C|HCIC318-05|DHJPAR0001802|Enyo ocypte|630bp  
 Belvosia Woodley04C|HCIC734-05|DHJPAR0003630|Enyo ocypte|623bp  
 Belvosia Woodley04C|HCIC333-05|DHJPAR0001817|Unzela japix|623bp  
 Belvosia Woodley04C|HCIC329-05|DHJPAR0001813|Unzela japix|623bp  
 Belvosia Woodley04C|HCIC328-05|DHJPAR0001812|Unzela japix|623bp  
 Belvosia Woodley04C|HCIC327-05|DHJPAR0001811|Unzela japix|623bp  
 Belvosia Woodley04C|HCIC314-05|DHJPAR0001798|Enyo ocypte|618bp  
 Belvosia Woodley04C|HCIC171-05|DHJPAR0001269|Enyo ocypte|632bp  
 Belvosia Woodley04C|HCIC335-05|DHJPAR0001819|Enyo ocypte|620bp  
 Belvosia Woodley04C|HCIC521-05|DHJPAR0002005|Unzela japix|636bp  
 Belvosia Woodley04C|HCIC522-05|DHJPAR0002006|Unzela japix|636bp  
 Belvosia Woodley04C|HCIC524-05|DHJPAR0002008|Unzela japix|636bp  
 Belvosia Woodley04C|HCIC538-05|DHJPAR0002022|Unzela japix|636bp  
 Belvosia Woodley04C|HCIC543-05|DHJPAR0002027|Unzela japix|636bp  
 Belvosia Woodley04C|HCIC548-05|DHJPAR0002032|Unzela japix|658bp  
 Belvosia Woodley04C|HCIC005-04|DHJPAR0001105|Unzela japix|620bp  
 Belvosia Woodley04C|HCIC179-05|DHJPAR0001270|Unzela japix|662bp  
 Belvosia Woodley04C|HCIC080-05|DHJPAR0001139|Unzela japix|662bp  
 Belvosia Woodley04C|HCIC688-05|DHJPAR0003584|Unzela japix|623bp  
 Belvosia Woodley04C|HCIC313-05|DHJPAR0001797|Unzela japix|618bp  
 Belvosia Woodley04C|HCIC326-05|DHJPAR0001810|Unzela japix|623bp  
 Belvosia Woodley04C|HCIC599-05|DHJPAR0002084|Unzela japix|636bp  
 Belvosia Woodley04C|HCIC604-05|DHJPAR0002089|Enyo ocypte|609bp  
 Belvosia Woodley04D|HCIC719-05|DHJPAR0003615|Enyo ocypte|625bp  
 Belvosia Woodley04D|HCIC714-05|DHJPAR0003610|Enyo ocypte|624bp  
 Belvosia Woodley04D|HCIC712-05|DHJPAR0003608|Enyo ocypte|623bp  
 Belvosia Woodley04D|HCIC234-05|DHJPAR0001716|Pachygonidia drucei|658bp  
 Belvosia Woodley04D|HCIC558-05|DHJPAR0002042|Eumorpha satellitia|613bp  
 Belvosia Woodley04D|HCIC559-05|DHJPAR0002043|Eumorpha satellitia|613bp  
 Belvosia Woodley04D|HCIC557-05|DHJPAR0002041|Eumorpha satellitia|614bp  
 Belvosia Woodley04D|HCIC556-05|DHJPAR0002040|Eumorpha satellitia|614bp

Belvosia Woodley04D|HCIC559-05|DHJPAR0002043|Eumorpha satellitia|613bp  
 Belvosia Woodley04D|HCIC557-05|DHJPAR0002041|Eumorpha satellitia|614bp  
 Belvosia Woodley04D|HCIC556-05|DHJPAR0002040|Pachygonidia drucei|614bp  
 Belvosia Woodley04D|HCIC555-05|DHJPAR0002039|Eumorpha satellitia|614bp  
 Belvosia Woodley04D|HCIC729-05|DHJPAR0003625|Pachygonidia drucei|626bp  
 Belvosia Woodley04D|HCIC739-05|DHJPAR0003635|Pachygonidia drucei|625bp  
 Belvosia Woodley04D|HCIC721-05|DHJPAR0003617|Pachygonidia drucei|625bp  
 Belvosia Woodley04D|HCIC707-05|DHJPAR0003603|Pachygonidia drucei|623bp  
 Belvosia Woodley04D|HCIC235-05|DHJPAR0001717|Eumorpha satellitia|626bp  
 Belvosia Woodley04D|HCIC242-05|DHJPAR0001724|Eumorpha satellitia|631bp  
 Belvosia Woodley04D|HCIC317-05|DHJPAR0001801|Enyo ocypete|624bp  
 Belvosia Woodley04D|HCIC539-05|DHJPAR0002023|Eumorpha satellitia|658bp  
 Belvosia Woodley04D|HCIC540-05|DHJPAR0002024|Unzela japix|633bp  
 Belvosia Woodley04D|HCIC545-05|DHJPAR0002029|Eumorpha satellitia|633bp  
 Belvosia Woodley04D|HCIC554-05|DHJPAR0002038|Pachygonidia drucei|658bp  
 Belvosia Woodley04D|HCIC549-05|DHJPAR0002033|Eumorpha satellitia|614bp  
 Belvosia Woodley04D|HCIC546-05|DHJPAR0002030|Eumorpha satellitia|614bp  
 Belvosia Woodley04D|HCIC243-05|DHJPAR0001725|Eumorpha satellitia|574bp  
 Belvosia Woodley04D|HCIC560-05|DHJPAR0002044|Eumorpha satellitia|613bp  
 Belvosia Woodley05|HCIC022-05|DHJPAR0001156|Rothschildia lebeau|662bp  
 Belvosia Woodley05|HCIC030-05|DHJPAR0001157|Rothschildia erycina|662bp  
 Belvosia Woodley05|HCIC682-05|DHJPAR0003578|Rothschildia lebeau|623bp  
 Belvosia Woodley05|HCIC038-05|DHJPAR0001158|Rothschildia erycina|662bp  
 Belvosia Woodley05|HCIC071-05|DHJPAR0001150|Rothschildia lebeau|662bp  
 Belvosia Woodley05|HCIC079-05|DHJPAR0001151|Rothschildia lebeau|662bp  
 Belvosia Woodley05|HCIC087-05|DHJPAR0001152|Rothschildia lebeau|662bp  
 Belvosia Woodley05|HCIC095-05|DHJPAR0001153|Rothschildia lebeau|662bp  
 Belvosia Woodley05|HCIC103-05|DHJPAR0001154|Rothschildia lebeau|662bp  
 Belvosia Woodley08|HCIC008-04|DHJPAR0001108|Automeris postalbida|619bp  
 Belvosia Woodley08|HCIC007-04|DHJPAR0001107|Automeris postalbida|630bp  
 Belvosia Woodley08|HCIC012-05|DHJPAR0001179|Automeris postalbida|613bp  
 Belvosia Woodley08|HCIC006-04|DHJPAR0001106|Automeris Janzen04|648bp  
 Belvosia Woodley08|HCIC694-05|DHJPAR0003590|Automeris banus|626bp  
 Belvosia Woodley08|HCIC686-05|DHJPAR0003582|Automeris banus|626bp  
 Belvosia Woodley08|HCIC685-05|DHJPAR0003581|Automeris postalbida|625bp  
 Belvosia Woodley08|HCIC036-05|DHJPAR0001182|Automeris Janzen04|662bp  
 Belvosia Woodley08|HCIC044-05|DHJPAR0001183|Automeris Janzen04|662bp  
 Belvosia Woodley08|HCIC052-05|DHJPAR0001184|Automeris Janzen04|662bp  
 Belvosia Woodley08|HCIC068-05|DHJPAR0001186|Automeris Janzen04|662bp  
 Belvosia Woodley08|HCIC020-05|DHJPAR0001180|Automeris postalbida|662bp  
 Belvosia Woodley08|HCIC028-05|DHJPAR0001181|Automeris Janzen04|662bp  
 Belvosia Woodley08|HCIC076-05|DHJPAR0001187|Automeris postalbida|662bp  
 Belvosia Woodley08|HCIC084-05|DHJPAR0001188|Automeris Janzen04|573bp  
 Belvosia Woodley16|HCIC175-05|DHJPAR0001222|Arsenura armida|662bp  
 Belvosia Woodley16|HCIC167-05|DHJPAR0001221|Arsenura armida|662bp  
 Belvosia Woodley16|HCIC159-05|DHJPAR0001220|Arsenura armida|662bp  
 Belvosia Woodley16|HCIC151-05|DHJPAR0001219|Arsenura armida|662bp  
 Belvosia Woodley16|HCIC134-05|DHJPAR0001228|Arsenura armida|662bp  
 Belvosia Woodley16|HCIC126-05|DHJPAR0001227|Arsenura armida|662bp  
 Belvosia Woodley16|HCIC118-05|DHJPAR0001226|Arsenura armida|662bp  
 Belvosia Woodley16|HCIC110-05|DHJPAR0001225|Arsenura armida|662bp  
 Belvosia Woodley16|HCIC183-05|DHJPAR0001223|Arsenura armida|658bp  
 Belvosia Woodley16|HCIC191-05|DHJPAR0001224|Arsenura armida|662bp  
 Belvosia Woodley18|HCIC180-05|DHJPAR0001258|Xylophanes tyndarus|662bp  
 Belvosia Woodley18|HCIC188-05|DHJPAR0001259|Xylophanes pistacina|662bp  
 Belvosia Woodley06|HCIC086-05|DHJPAR0001164|Manduca dilucida|554bp  
 Belvosia Woodley06|HCIC046-05|DHJPAR0001159|Manduca occulta|662bp  
 Belvosia Woodley06|HCIC062-05|DHJPAR0001161|Manduca Janzen1|579bp  
 Belvosia Woodley06|HCIC070-05|DHJPAR0001162|Manduca Janzen03|579bp  
 Belvosia Woodley06|HCIC078-05|DHJPAR0001163|Manduca dilucida|575bp  
 Belvosia Woodley06|HCIC013-05|DHJPAR0001167|Manduca rustica|567bp  
 Belvosia Woodley06|HCIC393-05|DHJPAR0001877|Manduca muscosa|658bp  
 Belvosia Woodley06|HCIC400-05|DHJPAR0001884|Manduca dilucida|585bp  
 Belvosia Woodley06|HCIC102-05|DHJPAR0001166|Manduca dilucida|580bp  
 Belvosia Woodley06|HCIC399-05|DHJPAR0001883|Manduca dilucida|632bp  
 Belvosia Woodley06|HCIC392-05|DHJPAR0001876|Manduca rustica|655bp  
 Belvosia Woodley06|HCIC387-05|DHJPAR0001871|Cocytius antaeus|656bp  
 Belvosia Woodley06|HCIC389-05|DHJPAR0001873|Manduca florestan|656bp  
 Belvosia Woodley06|HCIC395-05|DHJPAR0001879|Manduca muscosa|658bp  
 Belvosia Woodley06|HCIC394-05|DHJPAR0001878|Manduca muscosa|658bp  
 Belvosia Woodley06|HCIC391-05|DHJPAR0001875|Aellopos fadus|658bp  
 Belvosia Woodley06|HCIC390-05|DHJPAR0001874|Cocytius duponchel|658bp  
 Belvosia Woodley06|HCIC397-05|DHJPAR0001881|Manduca muscosa|658bp  
 Belvosia Woodley06|HCIC401-05|DHJPAR0001885|Manduca dilucida|658bp  
 Belvosia Woodley06|HCIC405-05|DHJPAR0001889|Manduca dilucida|658bp  
 Belvosia Woodley06|HCIC406-05|DHJPAR0001890|Manduca dilucida|658bp  
 Belvosia Woodley07E|HCIC354-05|DHJPAR0001838|Aellopos fadus|624bp  
 Belvosia Woodley07E|HCIC383-05|DHJPAR0001867|Erinnyis oenotrus|610bp  
 Belvosia Woodley07E|HCIC498-05|DHJPAR0001982|Aellopos fadus|614bp  
 Belvosia Woodley07E|HCIC485-05|DHJPAR0001969|Aellopos fadus|583bp  
 Belvosia Woodley07E|HCIC495-05|DHJPAR0001979|Aellopos fadus|621bp  
 Belvosia Woodley07E|HCIC503-05|DHJPAR0001987|Aellopos fadus|582bp  
 Belvosia Woodley07E|HCIC506-05|DHJPAR0001990|Aellopos fadus|583bp  
 Belvosia Woodley07E|HCIC489-05|DHJPAR0001973|Aellopos fadus|614bp  
 Belvosia Woodley07E|HCIC493-05|DHJPAR0001977|Aellopos fadus|582bp  
 Belvosia Woodley07E|HCIC085-05|DHJPAR0001176|Nyceryx coffaeae|662bp  
 Belvosia Woodley07E|HCIC484-05|DHJPAR0001968|Aellopos fadus|583bp  
 Belvosia Woodley07E|HCIC499-05|DHJPAR0001983|Aellopos fadus|583bp  
 Belvosia Woodley07E|HCIC509-05|DHJPAR0001993|Aellopos fadus|563bp  
 Belvosia Woodley07E|HCIC490-05|DHJPAR0001974|Aellopos fadus|563bp  
 Belvosia Woodley07E|HCIC381-05|DHJPAR0001865|Aellopos fadus|624bp  
 Belvosia Woodley07E|HCIC376-05|DHJPAR0001860|Aellopos fadus|623bp

Belvosia Woodley07E|HCIC490-05|DHJPAR0001974|Aellopos fadus|505bp  
 Belvosia Woodley07E|HCIC381-05|DHJPAR0001865|Aellopos fadus|624bp  
 Belvosia Woodley07E|HCIC376-05|DHJPAR0001860|Aellopos fadus|623bp  
 Belvosia Woodley07E|HCIC497-05|DHJPAR0001981|Erinnyis oenotrus|524bp  
 Belvosia Woodley07E|HCIC513-05|DHJPAR0001997|Erinnyis oenotrus|583bp  
 Belvosia Woodley07E|HCIC514-05|DHJPAR0001998|Erinnyis oenotrus|614bp  
 Belvosia Woodley07D|HCIC345-05|DHJPAR0001829|Callionima falcifera|623bp  
 Belvosia Woodley07D|HCIC743-05|DHJPAR0003639|Aellopos titan|623bp  
 Belvosia Woodley07D|HCIC291-05|DHJPAR0001773|Cautethia yucataana|615bp  
 Belvosia Woodley07D|HCIC370-05|DHJPAR0001854|Cautethia yucataana|618bp  
 Belvosia Woodley07D|HCIC478-05|DHJPAR0001962|Cautethia yucataana|658bp  
 Belvosia Woodley07D|HCIC482-05|DHJPAR0001966|Cautethia yucataana|580bp  
 Belvosia Woodley07D|HCIC483-05|DHJPAR0001967|Cautethia yucataana|580bp  
 Belvosia Woodley07D|HCIC748-05|DHJPAR0003644|Xylophanes chiron|626bp  
 Belvosia Woodley07D|HCIC357-05|DHJPAR0001841|Aellopos fadus|622bp  
 Belvosia Woodley07D|HCIC061-05|DHJPAR0001173|Xylophanes chiron|612bp  
 Belvosia Woodley07D|HCIC037-05|DHJPAR0001170|Xylophanes chiron|662bp  
 Belvosia Woodley07D|HCIC264-05|DHJPAR0001746|Xylophanes chiron|658bp  
 Belvosia Woodley07D|HCIC093-05|DHJPAR0001177|Xylophanes chiron|662bp  
 Belvosia Woodley07D|HCIC488-05|DHJPAR0001972|Aellopos titan|663bp  
 Belvosia Woodley07D|HCIC378-05|DHJPAR0001862|Aellopos titan|630bp  
 Belvosia Woodley07D|HCIC377-05|DHJPAR0001861|Aellopos titan|619bp  
 Belvosia Woodley07D|HCIC518-05|DHJPAR0002002|Aellopos titan|581bp  
 Belvosia Woodley07F|HCIC746-05|DHJPAR0003642|Xylophanes tersa|623bp  
 Belvosia Woodley07F|HCIC129-05|DHJPAR0001288|Xylophanes tersa|662bp  
 Belvosia Woodley07F|HCIC271-05|DHJPAR0001753|Xylophanes tersa|625bp  
 Belvosia Woodley07F|HCIC277-05|DHJPAR0001759|Xylophanes tersa|544bp  
 Belvosia Woodley07F|HCIC278-05|DHJPAR0001760|Xylophanes tersa|592bp  
 Belvosia Woodley07G|HCIC368-05|DHJPAR0001852|Xylophanes chiron|614bp  
 Belvosia Woodley07G|HCIC473-05|DHJPAR0001957|Xylophanes pluto|657bp  
 Belvosia Woodley07G|HCIC476-05|DHJPAR0001960|Xylophanes pluto|659bp  
 Belvosia Woodley07G|HCIC121-05|DHJPAR0001287|Xylophanes guianensis|662bp  
 Belvosia Woodley07G|HCIC053-05|DHJPAR0001172|Xylophanes pluto|618bp  
 Belvosia Woodley07G|HCIC749-05|DHJPAR0003645|Xylophanes pluto|625bp  
 Belvosia Woodley07G|HCIC289-05|DHJPAR0001771|Unzela japix|632bp  
 Belvosia Woodley07G|HCIC274-05|DHJPAR0001756|Xylophanes pluto|658bp  
 Belvosia Woodley07G|HCIC287-05|DHJPAR0001769|Xylophanes chiron|658bp  
 Belvosia Woodley07G|HCIC286-05|DHJPAR0001768|Xylophanes pluto|658bp  
 Belvosia Woodley07G|HCIC285-05|DHJPAR0001767|Xylophanes pluto|658bp  
 Belvosia Woodley07G|HCIC279-05|DHJPAR0001761|Xylophanes chiron|658bp  
 Belvosia Woodley07G|HCIC272-05|DHJPAR0001754|Xylophanes guianensis|658bp  
 Belvosia Woodley07G|HCIC263-05|DHJPAR0001745|Xylophanes chiron|657bp  
 Belvosia Woodley07G|HCIC137-05|DHJPAR0001289|Xylophanes chiron|612bp  
 Belvosia Woodley07G|HCIC288-05|DHJPAR0001770|Xylophanes chiron|610bp  
 Belvosia Woodley07G|HCIC468-05|DHJPAR0001952|Xylophanes anubus|636bp  
 Belvosia Woodley07G|HCIC470-05|DHJPAR0001954|Xylophanes pluto|658bp  
 Belvosia Woodley07G|HCIC471-05|DHJPAR0001955|Xylophanes pluto|658bp  
 Belvosia Woodley07G|HCIC472-05|DHJPAR0001956|Xylophanes pluto|658bp  
 Belvosia Woodley07G|HCIC474-05|DHJPAR0001958|Xylophanes pluto|658bp  
 Belvosia Woodley07G|HCIC475-05|DHJPAR0001959|Xylophanes pluto|658bp  
 Belvosia Woodley07G|HCIC276-05|DHJPAR0001758|Xylophanes chiron|578bp  
 Belvosia Woodley07G|HCIC352-05|DHJPAR0001836|Xylophanes pluto|620bp  
 Belvosia Woodley07G|HCIC273-05|DHJPAR0001755|Xylophanes chiron|593bp  
 Belvosia Woodley07G|HCIC355-05|DHJPAR0001839|Xylophanes zurcheri|577bp  
 Belvosia Woodley07G|HCIC265-05|DHJPAR0001747|Xylophanes guianensis|598bp  
 Belvosia Woodley07G|HCIC292-05|DHJPAR0001774|Xylophanes Janzen02|577bp  
 Belvosia Woodley07G|HCIC515-05|DHJPAR0001999|unknowable|533bp  
 Belvosia Woodley07G|HCIC519-05|DHJPAR0002003|unknowable|613bp  
 Belvosia Woodley07B|HCIC745-05|DHJPAR0003641|Erinnyis ello|625bp  
 Belvosia Woodley07B|HCIC364-05|DHJPAR0001848|Erinnyis crameri|607bp  
 Belvosia Woodley07B|HCIC366-05|DHJPAR0001850|Erinnyis crameri|618bp  
 Belvosia Woodley07B|HCIC365-05|DHJPAR0001849|Aellopos titan|634bp  
 Belvosia Woodley07B|HCIC367-05|DHJPAR0001851|Erinnyis crameri|624bp  
 Belvosia Woodley07B|HCIC742-05|DHJPAR0003638|Aellopos titan|625bp  
 Belvosia Woodley07B|HCIC351-05|DHJPAR0001835|Aellopos fadus|623bp  
 Belvosia Woodley07B|HCIC069-05|DHJPAR0001174|Erinnyis ello|662bp  
 Belvosia Woodley07B|HCIC266-05|DHJPAR0001748|Erinnyis ello|658bp  
 Belvosia Woodley07B|HCIC477-05|DHJPAR0001961|Erinnyis ello|655bp  
 Belvosia Woodley07B|HCIC290-05|DHJPAR0001772|Erinnyis ello|547bp  
 Belvosia Woodley07B|HCIC275-05|DHJPAR0001757|Aellopos fadus|543bp  
 Belvosia Woodley07B|HCIC501-05|DHJPAR0001985|Aellopos fadus|580bp  
 Belvosia Woodley07B|HCIC267-05|DHJPAR0001749|Erinnyis ello|640bp  
 Belvosia Woodley07B|HCIC353-05|DHJPAR0001837|Erinnyis ello|625bp  
 Belvosia Woodley07B|HCIC077-05|DHJPAR0001175|Eupyrrhoglossum sagra|662bp  
 Belvosia Woodley07B|HCIC363-05|DHJPAR0001847|Aellopos titan|624bp  
 Belvosia Woodley07B|HCIC469-05|DHJPAR0001953|Aellopos fadus|656bp  
 Belvosia Woodley07B|HCIC486-05|DHJPAR0001970|Aellopos titan|581bp  
 Belvosia Woodley07B|HCIC494-05|DHJPAR0001978|Erinnyis alope|580bp  
 Belvosia Woodley07B|HCIC194-05|DHJPAR0001284|Erinnyis alope|662bp  
 Belvosia Woodley07B|HCIC045-05|DHJPAR0001171|Erinnyis alope|662bp  
 Belvosia Woodley07B|HCIC280-05|DHJPAR0001762|Erinnyis alope|550bp  
 Belvosia Woodley07B|HCIC502-05|DHJPAR0001986|Aellopos fadus|582bp  
 Belvosia Woodley07B|HCIC505-05|DHJPAR0001989|Aellopos fadus|662bp  
 Belvosia Woodley07B|HCIC348-05|DHJPAR0001832|Erinnyis crameri|635bp  
 Belvosia Woodley07B|HCIC487-05|DHJPAR0001971|Aellopos fadus|580bp  
 Belvosia Woodley07B|HCIC479-05|DHJPAR0001963|Aellopos titan|656bp  
 Belvosia Woodley07B|HCIC380-05|DHJPAR0001864|Erinnyis ello|630bp  
 Belvosia Woodley07B|HCIC375-05|DHJPAR0001859|Aellopos titan|545bp  
 Belvosia Woodley07B|HCIC480-05|DHJPAR0001964|Erinnyis crameri|580bp  
 Belvosia Woodley07B|HCIC500-05|DHJPAR0001984|Aellopos fadus|583bp  
 Belvosia Woodley07C|HCIC101-05|DHJPAR0001178|Pachylia syces|517bp  
 Belvosia Woodley07C|HCIC284-05|DHJPAR0001766|Pachylia ficus|658bp  
 Belvosia Woodley07C|HCIC186-05|DHJPAR0001283|Pachylia syces|662bp

Belvosia Woodley07C|HCIC101-05|DHJPAR0001178|Pachylia syces|517bp  
Belvosia Woodley07C|HCIC284-05|DHJPAR0001766|Pachylia ficus|658bp  
Belvosia Woodley07C|HCIC186-05|DHJPAR0001283|Pachylia syces|662bp  
Belvosia Woodley07C|HCIC029-05|DHJPAR0001169|Pachylia syces|563bp  
Belvosia Woodley07C|HCIC344-05|DHJPAR0001828|Pachylia ficus|613bp  
Belvosia Woodley07C|HCIC113-05|DHJPAR0001286|Xylophanes chiron|634bp  
Belvosia Woodley07C|HCIC691-05|DHJPAR0003587|Pachylia syces|626bp  
Belvosia Woodley07C|HCIC282-05|DHJPAR0001764|Pachylia ficus|547bp  
Belvosia Woodley07C|HCIC268-05|DHJPAR0001750|Pachylia syces|627bp  
Belvosia Woodley07C|HCIC283-05|DHJPAR0001765|Pachylia syces|580bp  
Belvosia Woodley07C|HCIC346-05|DHJPAR0001830|Pachylia syces|634bp  
Belvosia Woodley07C|HCIC379-05|DHJPAR0001863|Pachylia syces|634bp  
Belvosia Woodley07A|HCIC747-05|DHJPAR0003643|Xylophanes zurcheri|619bp  
Belvosia Woodley07A|HCIC269-05|DHJPAR0001751|Xylophanes chiron|616bp  
Belvosia Woodley07A|HCIC343-05|DHJPAR0001827|Xylophanes maculator|623bp  
Belvosia Woodley07A|HCIC178-05|DHJPAR0001282|Xylophanes chiron|662bp  
Belvosia Woodley07A|HCIC170-05|DHJPAR0001281|Xylophanes chiron|662bp  
Belvosia Woodley07A|HCIC105-05|DHJPAR0001285|Xylophanes germen|662bp  
Belvosia Woodley07A|HCIC467-05|DHJPAR0001951|Xylophanes hannemanni|656bp  
Belvosia Woodley07H|HCIC369-05|DHJPAR0001853|Erinnyis obscura|629bp  
Belvosia Woodley07H|HCIC481-05|DHJPAR0001965|Erinnyis obscura|663bp  
Belvosia Woodley13|HCIC125-05|DHJPAR0001239|Coloradia marathusa|656bp  
Belvosia Woodley13|HCIC141-05|DHJPAR0001241|Coloradia marathusa|662bp  
Belvosia Woodley14|HCIC230-05|DHJPAR0001712|Ochrodota marina|658bp  
Belvosia Woodley14|HCIC231-05|DHJPAR0001713|Ochrodota marina|632bp  
Belvosia Woodley14|HCIC232-05|DHJPAR0001714|Ochrodota pronapides|658bp  
Belvosia Woodley14|HCIC233-05|DHJPAR0001715|Ochrodota pronapides|658bp  
Belvosia Woodley15|HCIC132-05|DHJPAR0001252|Hapigia repandens|525bp  
Belvosia Woodley15|HCIC692-05|DHJPAR0003588|Hapigia repandens|623bp  
Belvosia Woodley15|HCIC140-05|DHJPAR0001253|Hapigia repandens|662bp  
Belvosia Woodley15|HCIC148-05|DHJPAR0001254|Antaea lichyi|662bp  
Belvosia Woodley17|HCIC142-05|DHJPAR0001229|Pseudaletia sequax|662bp  
Belvosia Woodley17|HCIC158-05|DHJPAR0001231|Pseudaletia sequax|662bp  
Belvosia Woodley17|HCIC182-05|DHJPAR0001234|Pseudaletia sequax|662bp  
Belvosia Woodley17|HCIC190-05|DHJPAR0001235|Pseudaletia sequax|662bp  
Belvosia Woodley17|HCIC198-05|DHJPAR0001236|Pseudaletia sequax|662bp  
Belvosia Woodley19|HCIC149-05|DHJPAR0001242|Rothschildia triloba|662bp  
Belvosia Woodley19|HCIC173-05|DHJPAR0001245|Rothschildia triloba|662bp  
Belvosia Woodley01|HCIC058-05|DHJPAR0001114|Periphoba arcae|614bp  
Belvosia Woodley01|HCIC042-05|DHJPAR0001112|Periphoba arcae|562bp  
Belvosia Woodley01|HCIC009-04|DHJPAR0001099|Periphoba arcae|621bp  
Belvosia Woodley01|HCIC066-05|DHJPAR0001115|Periphoba arcae|575bp  
Belvosia Woodley01|HCIC107-05|DHJPAR0001261|Periphoba arcae|623bp  
Belvosia Woodley01|HCIC082-05|DHJPAR0001117|Periphoba arcae|662bp  
Belvosia Woodley01|HCIC147-05|DHJPAR0001266|Periphoba arcae|662bp  
Belvosia Woodley01|HCIC034-05|DHJPAR0001111|Periphoba arcae|618bp  
Belvosia Woodley01|HCIC018-05|DHJPAR0001109|Periphoba arcae|620bp  
Belvosia Woodley01|HCIC671-05|DHJPAR0003567|Periphoba arcae|622bp  
Belvosia Woodley01|HCIC050-05|DHJPAR0001113|Periphoba arcae|614bp  
Belvosia Woodley01|HCIC010-04|DHJPAR0001100|Periphoba arcae|648bp  
Belvosia Woodley01|HCIC670-05|DHJPAR0003566|Periphoba arcae|623bp  
Belvosia Woodley01|HCIC090-05|DHJPAR0001118|Periphoba arcae|662bp  
Belvosia Woodley01|HCIC115-05|DHJPAR0001262|Periphoba arcae|662bp  
Belvosia Woodley01|HCIC123-05|DHJPAR0001263|Periphoba arcae|662bp  
Belvosia Woodley01|HCIC139-05|DHJPAR0001265|Periphoba arcae|662bp  
Belvosia Woodley01|HCIC026-05|DHJPAR0001110|Automeris banus|662bp  
Belvosia Woodley01|HCIC074-05|DHJPAR0001116|Periphoba arcae|662bp  
Belvosia Woodley01|HCIC196-05|DHJPAR0001260|Periphoba arcae|662bp  
Belvosia Woodley02|HCIC025-05|DHJPAR0001121|Automeris exigua|581bp  
Belvosia Woodley02|HCIC033-05|DHJPAR0001122|Automeris exigua|575bp  
Belvosia Woodley02|HCIC680-05|DHJPAR0003576|Automeris zugana01|625bp  
Belvosia Woodley02|HCIC669-05|DHJPAR0003565|Automeris zugana01|626bp  
Belvosia Woodley02|HCIC673-05|DHJPAR0003569|Automeris zugana01|626bp  
Belvosia Woodley02|HCIC675-05|DHJPAR0003571|Automeris zugana01|626bp  
Belvosia Woodley02|HCIC699-05|DHJPAR0003595|Automeris Janzen01|626bp  
Belvosia Woodley02|HCIC700-05|DHJPAR0003596|Automeris Janzen01|626bp  
Belvosia Woodley02|HCIC676-05|DHJPAR0003572|Automeris zugana01|625bp  
Belvosia Woodley02|HCIC681-05|DHJPAR0003577|Automeris zugana01|625bp  
Belvosia Woodley02|HCIC674-05|DHJPAR0003570|Automeris zugana01|624bp  
Belvosia Woodley02|HCIC679-05|DHJPAR0003575|Automeris zugana01|624bp  
Belvosia Woodley02|HCIC684-05|DHJPAR0003580|Automeris zugana01|624bp  
Belvosia Woodley02|HCIC002-04|DHJPAR0001101|Automeris pallidior|623bp  
Belvosia Woodley02|HCIC003-04|DHJPAR0001102|Automeris pallidior|623bp  
Belvosia Woodley02|HCIC678-05|DHJPAR0003574|Automeris zugana01|625bp  
Belvosia Woodley02|HCIC049-05|DHJPAR0001124|Automeris celata|625bp  
Belvosia Woodley02|HCIC693-05|DHJPAR0003589|Automeris zugana|625bp  
Belvosia Woodley02|HCIC697-05|DHJPAR0003593|Automeris Janzen01|625bp  
Belvosia Woodley02|HCIC122-05|DHJPAR0001275|Automeris Janzen01|662bp  
Belvosia Woodley02|HCIC041-05|DHJPAR0001123|Automeris exigua|625bp  
Belvosia Woodley02|HCIC114-05|DHJPAR0001274|Automeris banus|662bp  
Belvosia Woodley02|HCIC065-05|DHJPAR0001126|Automeris pallidior|662bp  
Belvosia Woodley02|HCIC017-05|DHJPAR0001120|Automeris Janzen01|662bp  
Belvosia Woodley02|HCIC130-05|DHJPAR0001276|Automeris Janzen01|662bp  
Belvosia Woodley02|HCIC073-05|DHJPAR0001127|Automeris Janzen01|612bp  
Belvosia Woodley02|HCIC098-05|DHJPAR0001119|Automeris Janzen01|662bp  
Belvosia Woodley02|HCIC677-05|DHJPAR0003573|Automeris zugana01|625bp  
Belvosia Woodley02|HCIC146-05|DHJPAR0001278|Automeris Janzen01|662bp  
Belvosia Woodley02|HCIC057-05|DHJPAR0001125|Molippa nibasa|662bp  
Belvosia Woodley02|HCIC138-05|DHJPAR0001277|Automeris banus|658bp  
Belvosia Woodley02|HCIC162-05|DHJPAR0001280|Automeris Janzen02|662bp  
Belvosia Woodley03A|HCIC218-05|DHJPAR0001700|Hylesia umbrata|578bp  
Belvosia Woodley03A|HCIC211-05|DHJPAR0001693|Hylesia umbrata|586bp



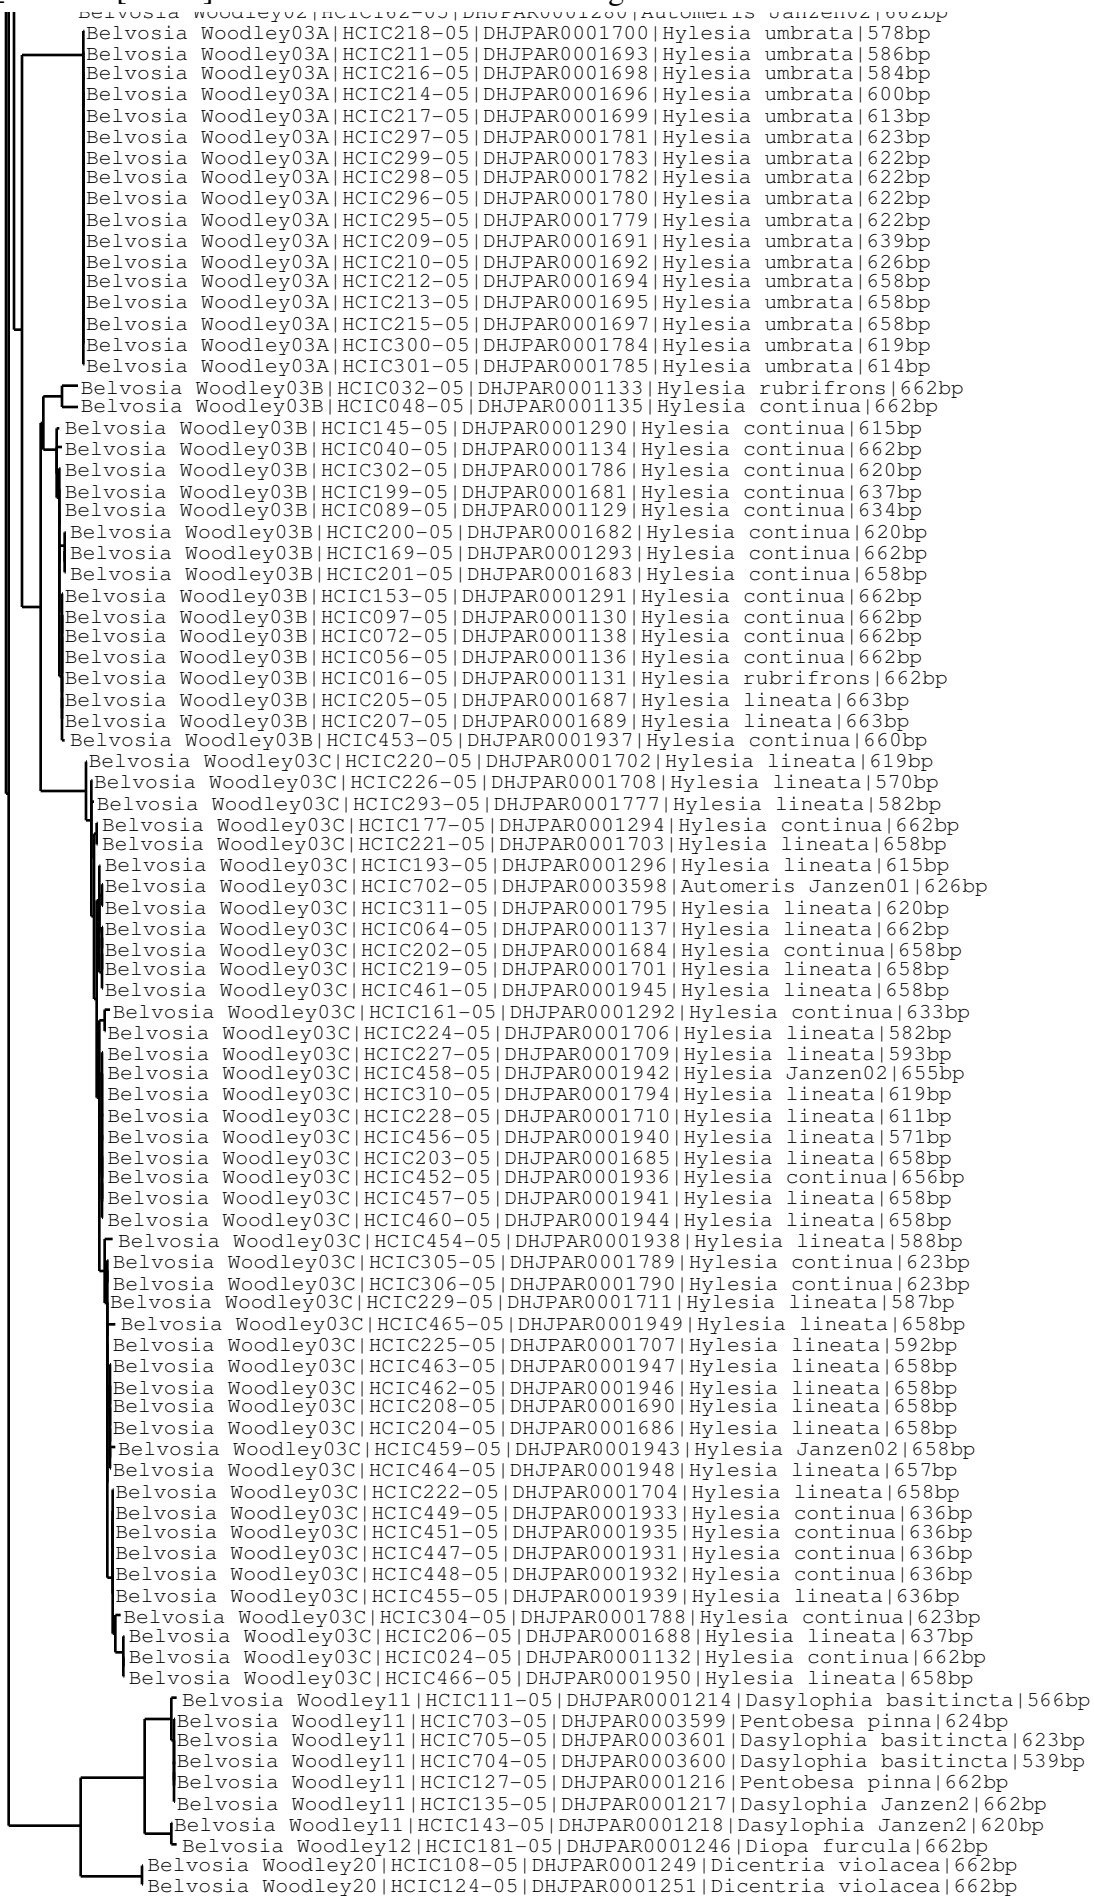

Supplement: pnas_0511318103_1.pdf [file pnas_0511318103_1.pdf]
