# Supplementary material
Source: PubMed Central journal article supplement (PMC1450138)
Supplement: pnas_0511318103_2.pdf [file pnas_0511318103_2.pdf]

| Appendix 2: Collection (http://janzen.sas.upenn) and sequence (www.barcodinglife.org - ACG Belvisia) information for specimens examined by this study. |                 |                |                       |                        |                 |                     |                     |             |                  |                                 |                      |                        |          |           |          |                      |
|--------------------------------------------------------------------------------------------------------------------------------------------------------|-----------------|----------------|-----------------------|------------------------|-----------------|---------------------|---------------------|-------------|------------------|---------------------------------|----------------------|------------------------|----------|-----------|----------|----------------------|
| Accession number                                                                                                                                       | BOLD Process ID | COI Seq Length | CO1 Genbank Accession | ITS1 Genbank Accession | Collection Date | Identification      | Host Species        | Host Family | Host Voucher     | Region                          | Sector               | Site                   | Latitude | Longitude | Elev (m) | Collectors           |
| DHJPAR0001099                                                                                                                                          | HCI009-04       | 621            | DQ348085              |                        | 01-May-2004     | Belvisia Woodley01  | Periphoba arcae     | Saurimidae  | 03-SRNP-26947    | Area de Conservacion Guanacaste | Sector Santa Rosa    | Cafetal                | 10.8527  | -85.6109  | 280      | Guillermo Pereira    |
| DHJPAR0001100                                                                                                                                          | HCI010-04       | 648            | DQ348086              |                        | 01-Aug-2004     | Belvisia Woodley01  | Periphoba arcae     | Saurimidae  | 03-SRNP-27167    | Area de Conservacion Guanacaste | Sector Santa Rosa    | Sendero Natural        | 10.8429  | -85.6125  | 290      | Ruth Franco          |
| DHJPAR0001109                                                                                                                                          | HCI018-05       | 620            | DQ348087              |                        | 04-Nov-2004     | Belvisia Woodley01  | Periphoba arcae     | Saurimidae  | 04-SRNP-13814    | Area de Conservacion Guanacaste | Sector Santa Rosa    | Camino Borrachos       | 10.8429  | -85.6161  | 295      | Ruth Franco          |
| DHJPAR0001110                                                                                                                                          | HCI026-05       | 662            | DQ348088              |                        | 11-Jan-2005     | Belvisia Woodley01  | Automeris banus     | Saurimidae  | 04-SRNP-26238    | Area de Conservacion Guanacaste | Del Oro              | Puente Mena            | 11.0456  | -85.4574  | 280      | Lucia Rios           |
| DHJPAR0001111                                                                                                                                          | HCI034-05       | 618            | DQ348089              |                        | 05-Feb-2004     | Belvisia Woodley01  | Periphoba arcae     | Saurimidae  | 03-SRNP-27218    | Area de Conservacion Guanacaste | Sector Naranjo       | Ojocal                 | 10.7651  | -85.6637  | 10       | Guillermo Pereira    |
| DHJPAR0001112                                                                                                                                          | HCI042-05       | 562            | DQ348090              |                        | 25-Oct-2003     | Belvisia Woodley01  | Periphoba arcae     | Saurimidae  | 03-SRNP-14215.07 | Area de Conservacion Guanacaste | Sector Santa Rosa    | Area Administrativa    | 10.8376  | -85.6187  | 295      | Adrian Guadamuz      |
| DHJPAR0001113                                                                                                                                          | HCI050-05       | 614            | DQ348091              |                        | 30-Sep-2003     | Belvisia Woodley01  | Periphoba arcae     | Saurimidae  | 03-SRNP-14984    | Area de Conservacion Guanacaste | Sector Santa Rosa    | Bosque San Emilio      | 10.8439  | -85.6138  | 300      | Ruth Franco          |
| DHJPAR0001114                                                                                                                                          | HCI058-05       | 614            | DQ348092              |                        | 04-Jul-2004     | Belvisia Woodley01  | Periphoba arcae     | Saurimidae  | 03-SRNP-27057    | Area de Conservacion Guanacaste | Sector Santa Rosa    | Sendero Natural        | 10.8377  | -85.6125  | 290      | Ruth Franco          |
| DHJPAR0001115                                                                                                                                          | HCI066-05       | 575            | DQ348093              |                        | 22-Jan-2004     | Belvisia Woodley01  | Periphoba arcae     | Saurimidae  | 03-SRNP-26926    | Area de Conservacion Guanacaste | Sector Santa Rosa    | Area Administrativa    | 10.8376  | -85.6187  | 295      | Ruth Franco          |
| DHJPAR0001116                                                                                                                                          | HCI074-05       | 662            | DQ348094              |                        | 04-Oct-2002     | Belvisia Woodley01  | Periphoba arcae     | Saurimidae  | 02-SRNP-27990    | Area de Conservacion Guanacaste | Sector El Hacha      | Finca Arraya           | 11.0154  | -85.5113  | 295      | Harry Ramirez        |
| DHJPAR0001117                                                                                                                                          | HCI082-05       | 662            | DQ348095              |                        | 13-Oct-2002     | Belvisia Woodley01  | Periphoba arcae     | Saurimidae  | 02-SRNP-27221    | Area de Conservacion Guanacaste | Del Oro              | Puente Mena            | 11.0456  | -85.4574  | 280      | Elieth Carrillano    |
| DHJPAR0001118                                                                                                                                          | HCI090-05       | 662            | DQ348096              |                        | 12-Jun-2002     | Belvisia Woodley01  | Periphoba arcae     | Saurimidae  | 01-SRNP-24104    | Area de Conservacion Guanacaste | Sector El Hacha      | Finca Arraya           | 11.0154  | -85.5113  | 295      | Tony Lara            |
| DHJPAR0001261                                                                                                                                          | HCI107-05       | 623            | DQ348097              |                        | 04-Jul-2004     | Belvisia Woodley01  | Periphoba arcae     | Saurimidae  | 03-SRNP-26934    | Area de Conservacion Guanacaste | Sector Santa Rosa    | Area Administrativa    | 10.8376  | -85.6187  | 295      | Jose Cortez          |
| DHJPAR0001262                                                                                                                                          | HCI115-05       | 662            | DQ348098              |                        | 05-Jul-2004     | Belvisia Woodley01  | Periphoba arcae     | Saurimidae  | 03-SRNP-27083    | Area de Conservacion Guanacaste | Sector Santa Rosa    | Casona Santa Rosa      | 10.8338  | -85.6127  | 295      | Ruth Franco          |
| DHJPAR0001263                                                                                                                                          | HCI123-05       | 662            | DQ348099              |                        | 10-Oct-2002     | Belvisia Woodley01  | Periphoba arcae     | Saurimidae  | 02-SRNP-27220    | Area de Conservacion Guanacaste | Del Oro              | Puente Mena            | 11.0456  | -85.4574  | 280      | Elieth Carrillano    |
| DHJPAR0001264                                                                                                                                          | HCI131-05       | 375            | DQ348100              |                        | 26-Jan-2002     | Belvisia Woodley01  | Periphoba arcae     | Saurimidae  | 01-SRNP-24311    | Area de Conservacion Guanacaste | Sector El Hacha      | Finca Arraya           | 11.0154  | -85.5113  | 295      | Roster Moraga        |
| DHJPAR0001265                                                                                                                                          | HCI139-05       | 662            | DQ348101              |                        | 07-Sep-2001     | Belvisia Woodley01  | Periphoba arcae     | Saurimidae  | 01-SRNP-15593    | Area de Conservacion Guanacaste | Sector Santa Rosa    | Cafetal                | 10.8583  | -85.6109  | 280      | guianeros            |
| DHJPAR0001266                                                                                                                                          | HCI147-05       | 662            | DQ348102              |                        | 28-Jun-2000     | Belvisia Woodley01  | Periphoba arcae     | Saurimidae  | 99-SRNP-17825    | Area de Conservacion Guanacaste | Sector Pallas        | Porton Rivas           | 10.7585  | -85.3727  | 570      | Guillermo Pereira    |
| DHJPAR0001267                                                                                                                                          | HCI196-05       | 662            | DQ348103              |                        | 04-Jul-2004     | Belvisia Woodley01  | Periphoba arcae     | Saurimidae  | 03-SRNP-26925    | Area de Conservacion Guanacaste | Sector Santa Rosa    | Area Administrativa    | 10.8376  | -85.6187  | 295      | Ruth Franco          |
| DHJPAR0003560                                                                                                                                          | HCI670-05       | 623            | DQ348084              |                        | 23-Sep-2005     | Belvisia Woodley01  | Periphoba arcae     | Saurimidae  | 05-SRNP-58598    | Area de Conservacion Guanacaste | Sector Mundo Nuevo   | Porton Mario Rivas     |          |           |          | Mariano Pereira      |
| DHJPAR0003567                                                                                                                                          | HCI671-05       | 622            | DQ348083              |                        | 30-Sep-2005     | Belvisia Woodley01  | Periphoba arcae     | Saurimidae  | 05-SRNP-58365    | Area de Conservacion Guanacaste | Sector Mundo Nuevo   | Estacion La Perla      |          |           |          | Jose Alberto Sanchez |
| DHJPAR0003593                                                                                                                                          | HCI697-05       | 625            | DQ348107              |                        | 20-May-2005     | Belvisia Woodley01  | Automeris Janzen01  | Saurimidae  | 04-SRNP-15251    | Area de Conservacion Guanacaste | Sector Santa Elena   | Casa Potrero Grande    | 10.84918 | -85.77315 | 17       | Freddy Quesada       |
| DHJPAR0001101                                                                                                                                          | HCI002-04       | 623            | DQ348123              |                        | 22-Dec-2003     | Belvisia Woodley02  | Automeris pallidior | Saurimidae  | 03-SRNP-30290    | Area de Conservacion Guanacaste | Sector Del Oro       | Quebrada Tigral        | 11.02681 | -85.49547 | 290      | A. Guadamuz          |
| DHJPAR0001102                                                                                                                                          | HCI003-04       | 623            | DQ348124              |                        | 25-Dec-2003     | Belvisia Woodley02  | Automeris pallidior | Saurimidae  | 03-SRNP-30290    | Area de Conservacion Guanacaste | Sector Del Oro       | Quebrada Tigral        | 11.02681 | -85.49547 | 290      | A. Guadamuz          |
| DHJPAR0001120                                                                                                                                          | HCI017-05       | 662            | DQ348125              |                        | 28-Jun-2005     | Belvisia Woodley02  | Automeris Janzen01  | Saurimidae  | 04-SRNP-49298    | Area de Conservacion Guanacaste | Sector Cacao         | Guayabal               | 10.8657  | -85.4918  | 500      | Harry Ramirez        |
| DHJPAR0001121                                                                                                                                          | HCI025-05       | 581            | DQ348126              |                        | 28-Jun-2004     | Belvisia Woodley02  | Automeris exigua    | Saurimidae  | 04-SRNP-41066    | Area de Conservacion Guanacaste | Rincon Raniforest    | Puente Rio Negro       | 10.9038  | -85.3027  | 340      | Covadonga Espinoza   |
| DHJPAR0001122                                                                                                                                          | HCI033-05       | 575            | DQ348127              |                        | 15-Jun-2004     | Belvisia Woodley02  | Automeris exigua    | Saurimidae  | 04-SRNP-41053    | Area de Conservacion Guanacaste | Rincon Raniforest    | Puente Rio Negro       | 10.9038  | -85.3027  | 340      | Jose Perez           |
| DHJPAR0001123                                                                                                                                          | HCI041-05       | 625            | DQ348128              |                        | 11-Jun-2004     | Belvisia Woodley02  | Automeris exigua    | Saurimidae  | 04-SRNP-41024    | Area de Conservacion Guanacaste | Rincon Raniforest    | Puente Rio Negro       | 10.9038  | -85.3027  | 340      | Jose Perez           |
| DHJPAR0001124                                                                                                                                          | HCI049-05       | 625            | DQ348129              |                        | 31-May-2004     | Belvisia Woodley02  | Automeris celata    | Saurimidae  | 04-SRNP-1125     | Area de Conservacion Guanacaste | Sector San Cristobal | Rio Blanco Abajo       | 10.9004  | -85.3725  | 500      | Neylin Hernandez     |
| DHJPAR0001125                                                                                                                                          | HCI067-05       | 662            | DQ348130              |                        | 10-Jul-2004     | Belvisia Woodley02  | Motopa nibasa       | Saurimidae  | 03-SRNP-27250    | Area de Conservacion Guanacaste | Sector Santa Rosa    | Area Administrativa    | 10.8376  | -85.6187  | 295      | Ruth Franco          |
| DHJPAR0001126                                                                                                                                          | HCI065-05       | 662            | DQ348131              |                        | 28-Sep-2004     | Belvisia Woodley02  | Automeris pallidior | Saurimidae  | 04-SRNP-47899    | Area de Conservacion Guanacaste | Sector Cacao         | Quebrada Otillo        | 10.89    | -85.4797  | 550      | Dunia Garcia         |
| DHJPAR0001127                                                                                                                                          | HCI073-05       | 612            | DQ348132              |                        | 09-Sep-2004     | Belvisia Woodley02  | Automeris Janzen01  | Saurimidae  | 04-SRNP-47343    | Area de Conservacion Guanacaste | Sector Cacao         | Quebrada Otillo        | 10.89    | -85.4797  | 550      | Harry Ramirez        |
| DHJPAR0001128                                                                                                                                          | HCI081-05       | 334            | DQ348133              |                        | 23-Aug-2003     | Belvisia Woodley02  | Automeris Janzen01  | Saurimidae  | 03-SRNP-14129    | Area de Conservacion Guanacaste | Sector Santa Rosa    | Vado Cuaquilinj        | 10.8827  | -85.612   | 255      | Guillermo Pereira    |
| DHJPAR0001129                                                                                                                                          | HCI088-05       | 662            | DQ348134              |                        | 03-Jan-2005     | Belvisia Woodley02  | Automeris Janzen01  | Saurimidae  | 04-SRNP-49926    | Area de Conservacion Guanacaste | Sector Cacao         | Quebrada Heliconia     | 10.8858  | -85.4922  | 390      | Mariano Pereira      |
| DHJPAR0001174                                                                                                                                          | HCI114-05       | 662            | DQ348135              |                        | 18-Sep-2003     | Belvisia Woodley02  | Automeris banus     | Saurimidae  | 03-SRNP-7342     | Area de Conservacion Guanacaste | Sector San Cristobal | Sendero Corredor       | 10.8787  | -85.3896  | 620      | Carolina Cano        |
| DHJPAR0001275                                                                                                                                          | HCI122-05       | 662            | DQ348136              |                        | 16-Nov-2002     | Belvisia Woodley02  | Automeris Janzen01  | Saurimidae  | 02-SRNP-17886    | Area de Conservacion Guanacaste | Sector El Hacha      | Sendero Tigre          | 11.0317  | -85.5262  | 280      | Lucia Rios           |
| DHJPAR0001276                                                                                                                                          | HCI130-05       | 662            | DQ348137              |                        | 27-Aug-2002     | Belvisia Woodley02  | Automeris Janzen01  | Saurimidae  | 02-SRNP-16839    | Area de Conservacion Guanacaste | Sector El Hacha      | Finca Arraya           | 11.0154  | -85.5113  | 295      | Elieth Carrillano    |
| DHJPAR0001277                                                                                                                                          | HCI136-05       | 658            | DQ348138              |                        | 30-Aug-2002     | Belvisia Woodley02  | Automeris banus     | Saurimidae  | 02-SRNP-1586     | Area de Conservacion Guanacaste | Sector San Cristobal | Rio Blanco Abajo       | 10.9004  | -85.3725  | 500      | Freddy Quesada       |
| DHJPAR0001278                                                                                                                                          | HCI146-05       | 662            | DQ348139              |                        | 21-Aug-2001     | Belvisia Woodley02  | Automeris Janzen01  | Saurimidae  | 01-SRNP-9531     | Area de Conservacion Guanacaste | Sector El Hacha      | Sendero Congo          | 11.021   | -85.5253  | 290      | Roster Moraga        |
| DHJPAR0001279                                                                                                                                          | HCI154-05       | 375            | DQ348140              |                        | 06-Dec-2001     | Belvisia Woodley02  | Automeris Janzen01  | Saurimidae  | 01-SRNP-11685    | Area de Conservacion Guanacaste | Sector El Hacha      | Sendero Bejuquilla     | 11.03    | -85.527   | 280      | Lucia Rios           |
| DHJPAR0001280                                                                                                                                          | HCI162-05       | 662            | DQ348141              |                        | 03-Feb-2002     | Belvisia Woodley02  | Automeris Janzen02  | Saurimidae  | 01-SRNP-22002    | Area de Conservacion Guanacaste | Sector San Cristobal | Sitio San Geronimo     | 10.873   | -85.3814  | 680      | Freddy Quesada       |
| DHJPAR0003564                                                                                                                                          | HCI666-05       | 430            | DQ348122              |                        | 22-Sep-2005     | Belvisia Woodley02  | Automeris zugana01  | Saurimidae  | 05-SRNP-58962    | Area de Conservacion Guanacaste | Sector Mundo Nuevo   | Estacion La Perla      |          |           |          | Jose Cortez          |
| DHJPAR0003565                                                                                                                                          | HCI669-05       | 626            | DQ348121              |                        | 16-Sep-2005     | Belvisia Woodley02  | Automeris zugana01  | Saurimidae  | 05-SRNP-58948    | Area de Conservacion Guanacaste | Sector Mundo Nuevo   | Estacion La Perla      |          |           |          | Jose Cortez          |
| DHJPAR0003568                                                                                                                                          | HCI672-05       | 626            | DQ348120              |                        | 15-Sep-2005     | Belvisia Woodley02  | Automeris zugana01  | Saurimidae  | 05-SRNP-58961    | Area de Conservacion Guanacaste | Sector Mundo Nuevo   | Estacion La Perla      |          |           |          | Jose Cortez          |
| DHJPAR0003569                                                                                                                                          | HCI673-05       | 626            | DQ348119              |                        | 2-Sep-2005      | Belvisia Woodley02  | Automeris zugana01  | Saurimidae  | 05-SRNP-57675    | Area de Conservacion Guanacaste | Sector Mundo Nuevo   | Estacion La Perla      |          |           |          | Yerfing Campos       |
| DHJPAR0003570                                                                                                                                          | HCI674-05       | 624            | DQ348118              |                        | 5-Sep-2005      | Belvisia Woodley02  | Automeris zugana01  | Saurimidae  | 05-SRNP-58073    | Area de Conservacion Guanacaste | Sector Mundo Nuevo   | Vado San Antonio       |          |           |          | Mariano Pereira      |
| DHJPAR0003571                                                                                                                                          | HCI675-05       | 626            | DQ348117              |                        | 9-Sep-2005      | Belvisia Woodley02  | Automeris zugana01  | Saurimidae  | 05-SRNP-58610    | Area de Conservacion Guanacaste | Sector Mundo Nuevo   | Vado Quebrada Agria    |          |           |          | Jose Alberto Sanchez |
| DHJPAR0003572                                                                                                                                          | HCI676-05       | 625            | DQ348116              |                        | 15-Sep-2005     | Belvisia Woodley02  | Automeris zugana01  | Saurimidae  | 05-SRNP-58133    | Area de Conservacion Guanacaste | Sector Mundo Nuevo   | Quebrada Tibio Perla   |          |           |          | Jose Alberto Sanchez |
| DHJPAR0003573                                                                                                                                          | HCI677-05       | 625            | DQ348115              |                        | 17-Sep-2005     | Belvisia Woodley02  | Automeris zugana01  | Saurimidae  | 05-SRNP-58834    | Area de Conservacion Guanacaste | Sector Mundo Nuevo   | Quebrada Tibio Perla   |          |           |          | Mariano Pereira      |
| DHJPAR0003574                                                                                                                                          | HCI678-05       | 625            | DQ348114              |                        | 16-Sep-2005     | Belvisia Woodley02  | Automeris zugana01  | Saurimidae  | 05-SRNP-58825    | Area de Conservacion Guanacaste | Sector Mundo Nuevo   | Quebrada Tibio Perla   |          |           |          | Mariano Pereira      |
| DHJPAR0003575                                                                                                                                          | HCI679-05       | 624            | DQ348113              |                        | 18-Sep-2005     | Belvisia Woodley02  | Automeris zugana01  | Saurimidae  | 05-SRNP-58144    | Area de Conservacion Guanacaste | Sector Mundo Nuevo   | Vado San Antonio       |          |           |          | Jose Alberto Sanchez |
| DHJPAR0003576                                                                                                                                          | HCI680-05       | 625            | DQ348112              |                        | 17-Sep-2005     | Belvisia Woodley02  | Automeris zugana01  | Saurimidae  | 05-SRNP-58830    | Area de Conservacion Guanacaste | Sector Mundo Nuevo   | Quebrada Tibio Perla   |          |           |          | Mariano Pereira      |
| DHJPAR0003577                                                                                                                                          | HCI681-05       | 625            | DQ348111              |                        | 15-Sep-2005     | Belvisia Woodley02  | Automeris zugana01  | Saurimidae  | 05-SRNP-58961    | Area de Conservacion Guanacaste | Sector Mundo Nuevo   | Estacion La Perla      |          |           |          | Jose Cortez          |
| DHJPAR0003580                                                                                                                                          | HCI684-05       | 624            | DQ348110              |                        | 22-Sep-2005     | Belvisia Woodley02  | Automeris zugana01  | Saurimidae  | 05-SRNP-58829    | Area de Conservacion Guanacaste | Sector Mundo Nuevo   | Quebrada Tibio Perla   |          |           |          | Mariano Pereira      |
| DHJPAR0003589                                                                                                                                          | HCI693-05       | 625            | DQ348109              |                        | 25-Sep-2005     | Belvisia Woodley02  | Automeris zugana    | Saurimidae  | 05-SRNP-49309    | Area de Conservacion Guanacaste | Sector Cacao         | Quebrada Otillo        | 10.89996 | -85.47966 | 950      | Manuel Pereira       |
| DHJPAR0003591                                                                                                                                          | HCI695-05       | 418            | DQ348108              |                        | 16-Aug-1984     | Belvisia Woodley02  | Manibuca lanuginosa | Sphingidae  | 99-SRNP-1199     | Area de Conservacion Guanacaste | Sector Santa Rosa    | Bosque Humedo          | 10.85145 | -85.69061 | 290      | Daniel H. Janzen     |
| DHJPAR0003592                                                                                                                                          | HCI696-05       | 419            | DQ348106              |                        | 23-Aug-1984     | Belvisia Woodley02  | Manibuca lanuginosa | Sphingidae  | 99-SRNP-1199     | Area de Conservacion Guanacaste | Sector Santa Rosa    | Bosque Humedo          | 10.85145 | -85.69061 | 290      | Daniel H. Janzen     |
| DHJPAR0003593                                                                                                                                          | HCI699-05       | 626            | DQ348105              |                        | 17-Jun-2005     | Belvisia Woodley02  | Automeris Janzen01  | Saurimidae  | 04-SRNP-15225    | Area de Conservacion Guanacaste | Sector Santa Elena   | Casa Potrero Grande    | 10.84918 | -85.77315 | 17       | Freddy Quesada       |
| DHJPAR0003594                                                                                                                                          | HCI700-05       | 626            | DQ348104              |                        | 13-Oct-1990     | Belvisia Woodley02  | Automeris Janzen01  | Saurimidae  | 99-SRNP-1763     | Area de Conservacion Guanacaste | Sector Santa Rosa    | Cafetal                | 10.8527  | -85.6109  | 380      | guianeros            |
| DHJPAR0003597                                                                                                                                          | HCI701-05       | 626            | DQ348103              |                        | 13-Oct-1990     | Belvisia Woodley02  | Automeris Janzen01  | Saurimidae  | 99-SRNP-1763     | Area de Conservacion Guanacaste | Sector Santa Rosa    | Cafetal                | 10.8527  | -85.6109  | 380      | guianeros            |
| DHJPAR0001991                                                                                                                                          | HCI209-05       | 639            | DQ348142              |                        | 27-Jan-2000     | Belvisia Woodley03A | Hyleisia umbrata    | Saurimidae  | 99-SRNP-15352    | Area de Conservacion Guanacaste | Sector El Hacha      | Estacion Los Almendros | 11.0285  | -85.5278  | 290      | Roster Moraga        |
| DHJPAR0001992                                                                                                                                          | HCI210-05       | 626            | DQ348143              |                        | 12-Nov-1999     | Belvisia Woodley03A | Hyleisia umbrata    | Saurimidae  | 99-SRNP-15087    | Area de Conservacion Guanacaste | Sector El Hacha      | Estacion Los Almendros | 11.0285  | -85.5278  | 290      | Roster Moraga        |
| DHJPAR0001993                                                                                                                                          | HCI211-05       | 586            | DQ348144              |                        | 24-Nov-1999     | Belvisia Woodley03A | Hyleisia umbrata    | Saurimidae  | 99-SRNP-15076    | Area de Conservacion Guanacaste | Sector El Hacha      | Estacion Los Almendros | 11.0285  | -85.5278  | 290      | Roster Moraga        |
| DHJPAR0001994                                                                                                                                          | HCI212-05       | 588            | DQ348145              |                        | 12-Nov-1999     | Belvisia Woodley03A | Hyleisia umbrata    | Saurimidae  | 99-SRNP-3997     | Area de Conservacion Guanacaste | Sector El Hacha      | Estacion Los Almendros | 11.0285  | -85.5278  | 290      | Roster Moraga        |
| DHJPAR0001995                                                                                                                                          | HCI213-05       | 588            | DQ348146              |                        | 08-Nov-1999     | Belvisia Woodley03A | Hyleisia umbrata    | Saurimidae  | 99-SRNP-3964     | Area de Conservacion Guanacaste | Sector El Hacha      | Estacion Los Almendros | 11.0285  | -85.5278  | 290      | Roster Moraga        |
| DHJPAR0001996                                                                                                                                          | HCI214-05       | 600            | DQ348147              |                        | 08-Nov-1999     | Belvisia Woodley03A | Hyleisia umbrata    | Saurimidae  | 99-SRNP-3930     | Area de Conservacion Guanacaste | Sector El Hacha      | Estacion Los Almendros | 11.0285  | -85.5278  | 290      | Roster Moraga        |
| DHJPAR0001997                                                                                                                                          | HCI215-05       | 588            | DQ348148              |                        | 08-Nov-1999     | Belvisia Woodley03A | Hyleisia umbrata    | Saurimidae  | 99-SRNP-3870     | Area de Conservacion Guanacaste | Sector El Hacha      | Estacion Los Almendros | 11.0285  | -85.5278  |          |                      |

|               |            |     |          |  |             |                     |                     |             |                  |                                 |                      |                     |          |           |      |                   |
|---------------|------------|-----|----------|--|-------------|---------------------|---------------------|-------------|------------------|---------------------------------|----------------------|---------------------|----------|-----------|------|-------------------|
| DHJPAR0001131 | HIC1016-05 | 662 | DO348160 |  | 03-Jul-2003 | Belvosia Woodley03B | Hyleisia rubrifrons | Saturniidae | 03-SRNP-10608    | Area de Conservacion Guanacaste | Rincon Rainforest    | San Lucas           | 10.9185  | -85.3034  | 320  | Minor Carmona     |
| DHJPAR0001133 | HIC1032-05 | 662 | DO348161 |  | 10-Jun-2003 | Belvosia Woodley03B | Hyleisia rubrifrons | Saturniidae | 03-SRNP-10736    | Area de Conservacion Guanacaste | Rincon Rainforest    | Camino Rio Francia  | 10.9043  | -85.2865  | 410  | Carolina Cano     |
| DHJPAR0001134 | HIC1040-05 | 662 | DO348162 |  | 06-Jun-2003 | Belvosia Woodley03B | Hyleisia continua   | Saturniidae | 03-SRNP-6038     | Area de Conservacion Guanacaste | Sector San Cristobal | Rio Blanco Abajo    | 10.9004  | -85.3725  | 500  | Ovaldo Espinoza   |
| DHJPAR0001135 | HIC1048-05 | 662 | DO348163 |  | 18-Jun-2003 | Belvosia Woodley03B | Hyleisia continua   | Saturniidae | 03-SRNP-5965     | Area de Conservacion Guanacaste | Sector San Cristobal | Rio Blanco Abajo    | 10.9004  | -85.3725  | 500  | Gloria Shezear    |
| DHJPAR0001136 | HIC1056-05 | 662 | DO348164 |  | 30-Jan-2002 | Belvosia Woodley03B | Hyleisia continua   | Saturniidae | 02-SRNP-20219    | Area de Conservacion Guanacaste | Sector San Cristobal | Sendero Perdido     | 10.8794  | -85.3861  | 620  | Carolina Cano     |
| DHJPAR0001138 | HIC1072-05 | 662 | DO348165 |  | 06-Mar-2003 | Belvosia Woodley03B | Hyleisia continua   | Saturniidae | 02-SRNP-21534    | Area de Conservacion Guanacaste | Rincon Rainforest    | Montaña Figueres    | 10.8837  | -85.2908  | 460  | Jose Perez        |
| DHJPAR0001129 | HIC1089-05 | 634 | DO348166 |  | 11-Oct-2004 | Belvosia Woodley03B | Hyleisia continua   | Saturniidae | 04-SRNP-23873    | Area de Conservacion Guanacaste | Sector El Hacha      | La Gutarrá          | 10.9938  | -85.5211  | 355  | Guillermo         |
| DHJPAR0001130 | HIC1097-05 | 662 | DO348167 |  | 24-Sep-2003 | Belvosia Woodley03B | Hyleisia continua   | Saturniidae | 03-SRNP-18486    | Area de Conservacion Guanacaste | Del Oro              | Quebrada Trigal     | 11.0268  | -85.4955  | 290  | Elieth Carrilano  |
| DHJPAR0001290 | HIC1145-05 | 615 | DO348168 |  | 30-Sep-2002 | Belvosia Woodley03B | Hyleisia continua   | Saturniidae | 02-SRNP-18638    | Area de Conservacion Guanacaste | Sector San Cristobal | Rio Blanco Abajo    | 10.9004  | -85.3725  | 500  | Gloria Shezear    |
| DHJPAR0001291 | HIC1153-05 | 662 | DO348169 |  | 27-Jun-2002 | Belvosia Woodley03B | Hyleisia continua   | Saturniidae | 02-SRNP-2623     | Area de Conservacion Guanacaste | Sector San Cristobal | Sendero Corredor    | 10.8787  | -85.3896  | 620  | Gloria Shezear    |
| DHJPAR0001293 | HIC1169-05 | 662 | DO348170 |  | 22-Jan-2002 | Belvosia Woodley03B | Hyleisia continua   | Saturniidae | 01-SRNP-22480    | Area de Conservacion Guanacaste | Sector San Cristobal | Rio Blanco Abajo    | 10.9004  | -85.3725  | 500  | Carolina Cano     |
| DHJPAR0001681 | HIC1189-05 | 637 | DO348171 |  | 21-Oct-2002 | Belvosia Woodley03B | Hyleisia continua   | Saturniidae | 02-SRNP-18965    | Area de Conservacion Guanacaste | Sector San Cristobal | Rio Blanco Abajo    | 10.9004  | -85.3725  | 500  | Carolina Cano     |
| DHJPAR0001682 | HIC1200-05 | 620 | DO348172 |  | 25-Oct-2002 | Belvosia Woodley03B | Hyleisia continua   | Saturniidae | 02-SRNP-18647    | Area de Conservacion Guanacaste | Sector San Cristobal | Rio Blanco Abajo    | 10.9004  | -85.3725  | 500  | Carolina Cano     |
| DHJPAR0001683 | HIC1201-05 | 658 | DO348173 |  | 08-Sep-2002 | Belvosia Woodley03B | Hyleisia continua   | Saturniidae | 02-SRNP-17639    | Area de Conservacion Guanacaste | Del Oro              | Sendero Puertas     | 11.0109  | -85.4882  | 400  | Roster Moraga     |
| DHJPAR0001687 | HIC1205-05 | 663 | DO348174 |  | 01-Sep-2001 | Belvosia Woodley03B | Hyleisia lineata    | Saturniidae | 01-SRNP-15600    | Area de Conservacion Guanacaste | Sector Santa Rosa    | Cafetal             | 10.8583  | -85.6109  | 280  | guaneros          |
| DHJPAR0001689 | HIC1207-05 | 663 | DO348175 |  | 22-Sep-2001 | Belvosia Woodley03B | Hyleisia lineata    | Saturniidae | 01-SRNP-15370    | Area de Conservacion Guanacaste | Sector Santa Rosa    | Bosque Humedo       | 10.8514  | -85.608   | 290  | guaneros          |
| DHJPAR0001786 | HIC1302-05 | 620 | DO348176 |  | 10-Sep-1998 | Belvosia Woodley03B | Hyleisia continua   | Saturniidae | 99-SRNP-5571     | Area de Conservacion Guanacaste | Sector El Hacha      | Sendero Potrero     | 11.0264  | -85.5278  | 290  | Lucia Rios        |
| DHJPAR0001837 | HIC1453-05 | 660 | DO348177 |  | 9-Jun-1997  | Belvosia Woodley03B | Hyleisia continua   | Saturniidae | 97-SRNP-4042     | Area de Conservacion Guanacaste | Sector El Hacha      | Sendero Tigre       | 11.0372  | -85.53815 | 280  | Manoel Pereira    |
| DHJPAR0001132 | HIC1024-05 | 662 | DO348178 |  | 19-Jul-2003 | Belvosia Woodley03C | Hyleisia continua   | Saturniidae | 03-SRNP-6193     | Area de Conservacion Guanacaste | Sector San Cristobal | Sendero Perdido     | 10.8794  | -85.3861  | 620  | Jose Perez        |
| DHJPAR0001137 | HIC1064-05 | 662 | DO348180 |  | 07-Jan-2003 | Belvosia Woodley03C | Hyleisia lineata    | Saturniidae | 02-SRNP-32771    | Area de Conservacion Guanacaste | Sector Horizontes    | Vado Estero         | 10.7627  | -85.58    | 95   | Manuel Pereira    |
| DHJPAR0001292 | HIC181-05  | 662 | DO348181 |  | 11-May-2002 | Belvosia Woodley03C | Hyleisia continua   | Saturniidae | 02-SRNP-14122.07 | Area de Conservacion Guanacaste | Del Oro              | Puente Mena         | 11.0456  | -85.4574  | 380  | Adrian Cuadrum    |
| DHJPAR0001294 | HIC1177-05 | 662 | DO348182 |  | 15-May-2002 | Belvosia Woodley03C | Hyleisia continua   | Saturniidae | 02-SRNP-2237     | Area de Conservacion Guanacaste | Sector San Cristobal | Rio Blanco Abajo    | 10.9004  | -85.3725  | 500  | Gloria Shezear    |
| DHJPAR0001295 | HIC1185-05 | 374 | DO348183 |  | 20-Feb-2002 | Belvosia Woodley03C | Hyleisia lineata    | Saturniidae | 01-SRNP-18463    | Area de Conservacion Guanacaste | Sector Santa Rosa    | Quebrada Costa Rica | 10.8274  | -85.6365  | 275  | guaneros          |
| DHJPAR0001296 | HIC1193-05 | 615 | DO348184 |  | 16-Sep-2001 | Belvosia Woodley03C | Hyleisia lineata    | Saturniidae | 01-SRNP-15543    | Area de Conservacion Guanacaste | Sector Santa Rosa    | Bosque San Emilio   | 10.8439  | -85.6138  | 300  | guaneros          |
| DHJPAR0001684 | HIC1202-05 | 658 | DO348185 |  | 13-May-2002 | Belvosia Woodley03C | Hyleisia continua   | Saturniidae | 02-SRNP-14123.01 | Area de Conservacion Guanacaste | Del Oro              | Puente Mena         | 11.0456  | -85.4574  | 290  | Dunia Garcia      |
| DHJPAR0001685 | HIC1203-05 | 658 | DO348186 |  | 05-Feb-2002 | Belvosia Woodley03C | Hyleisia lineata    | Saturniidae | 01-SRNP-18535    | Area de Conservacion Guanacaste | Sector Santa Rosa    | Quebrada Costa Rica | 10.8274  | -85.6365  | 275  | Manuel Pereira    |
| DHJPAR0001686 | HIC1204-05 | 658 | DO348187 |  | 18-Feb-2002 | Belvosia Woodley03C | Hyleisia lineata    | Saturniidae | 01-SRNP-18495    | Area de Conservacion Guanacaste | Sector Santa Rosa    | Quebrada Costa Rica | 10.8274  | -85.6365  | 275  | guaneros          |
| DHJPAR0001688 | HIC1206-05 | 637 | DO348188 |  | 29-Aug-2001 | Belvosia Woodley03C | Hyleisia lineata    | Saturniidae | 01-SRNP-15460    | Area de Conservacion Guanacaste | Sector Santa Rosa    | Cafetal             | 10.8583  | -85.6109  | 280  | guaneros          |
| DHJPAR0001690 | HIC1208-05 | 658 | DO348189 |  | 13-Jan-2001 | Belvosia Woodley03C | Hyleisia lineata    | Saturniidae | 02-SRNP-20099    | Area de Conservacion Guanacaste | Sector Santa Rosa    | Quebrada Costa Rica | 10.8274  | -85.6365  | 275  | Manuel Pereira    |
| DHJPAR0001701 | HIC1219-05 | 658 | DO348190 |  | 22-Sep-1997 | Belvosia Woodley03C | Hyleisia lineata    | Saturniidae | 97-SRNP-3689     | Area de Conservacion Guanacaste | Sector Santa Rosa    | Quebrada Costa Rica | 10.8274  | -85.6365  | 275  | guaneros          |
| DHJPAR0001702 | HIC1220-05 | 619 | DO348191 |  | 04-Oct-1997 | Belvosia Woodley03C | Hyleisia lineata    | Saturniidae | 97-SRNP-3603     | Area de Conservacion Guanacaste | Sector Santa Rosa    | Quebrada Costa Rica | 10.8274  | -85.6365  | 275  | Elieth Carrilano  |
| DHJPAR0001703 | HIC1221-05 | 658 | DO348192 |  | 24-Sep-1997 | Belvosia Woodley03C | Hyleisia lineata    | Saturniidae | 97-SRNP-3526     | Area de Conservacion Guanacaste | Sector Santa Rosa    | Quebrada Costa Rica | 10.8274  | -85.6365  | 275  | Guillermo Pereira |
| DHJPAR0001704 | HIC1222-05 | 658 | DO348193 |  | 17-Dec-1996 | Belvosia Woodley03C | Hyleisia lineata    | Saturniidae | 96-SRNP-11578.36 | Area de Conservacion Guanacaste | Sector Santa Rosa    | Las Mesas           | 10.8465  | -85.6092  | 305  | guaneros          |
| DHJPAR0001705 | HIC1223-05 | 366 | DO348194 |  | 02-Sep-1996 | Belvosia Woodley03C | Hyleisia lineata    | Saturniidae | 96-SRNP-5219     | Area de Conservacion Guanacaste | Sector Santa Rosa    | Cafetal             | 10.8583  | -85.6109  | 280  | guaneros          |
| DHJPAR0001706 | HIC1224-05 | 582 | DO348195 |  | 29-Jan-1993 | Belvosia Woodley03C | Hyleisia lineata    | Saturniidae | 92-SRNP-6096     | Area de Conservacion Guanacaste | Sector Santa Rosa    | Bosque San Emilio   | 10.8439  | -85.6138  | 300  | guaneros          |
| DHJPAR0001707 | HIC1225-05 | 592 | DO348196 |  | 16-Feb-1993 | Belvosia Woodley03C | Hyleisia lineata    | Saturniidae | 92-SRNP-6089.41  | Area de Conservacion Guanacaste | Sector Santa Rosa    | Bosque San Emilio   | 10.8439  | -85.6138  | 300  | guaneros          |
| DHJPAR0001708 | HIC1226-05 | 570 | DO348197 |  | 20-Feb-1992 | Belvosia Woodley03C | Hyleisia lineata    | Saturniidae | 92-SRNP-6087.12  | Area de Conservacion Guanacaste | Sector Santa Rosa    | Cafetal             | 10.8583  | -85.6109  | 280  | guaneros          |
| DHJPAR0001709 | HIC1227-05 | 593 | DO348198 |  | 16-Jan-1992 | Belvosia Woodley03C | Hyleisia lineata    | Saturniidae | 91-SRNP-3136.223 | Area de Conservacion Guanacaste | Sector Santa Rosa    | Bosque San Emilio   | 10.8439  | -85.6138  | 300  | guaneros          |
| DHJPAR0001710 | HIC1228-05 | 611 | DO348199 |  | 18-Jan-1992 | Belvosia Woodley03C | Hyleisia lineata    | Saturniidae | 91-SRNP-3136.215 | Area de Conservacion Guanacaste | Sector Santa Rosa    | Bosque San Emilio   | 10.8439  | -85.6138  | 300  | guaneros          |
| DHJPAR0001711 | HIC1229-05 | 587 | DO348200 |  | 03-Jan-1992 | Belvosia Woodley03C | Hyleisia lineata    | Saturniidae | 91-SRNP-3136.204 | Area de Conservacion Guanacaste | Sector Santa Rosa    | Bosque San Emilio   | 10.8439  | -85.6138  | 300  | guaneros          |
| DHJPAR0001777 | HIC1233-05 | 582 | DO348201 |  | 02-Feb-2002 | Belvosia Woodley03C | Hyleisia lineata    | Saturniidae | 01-SRNP-18636    | Area de Conservacion Guanacaste | Sector Santa Rosa    | Quebrada Costa Rica | 10.8274  | -85.6365  | 275  | Manuel Pereira    |
| DHJPAR0001787 | HIC1303-05 | 418 | DO348202 |  | 09-Jun-1997 | Belvosia Woodley03C | Hyleisia continua   | Saturniidae | 97-SRNP-4101     | Area de Conservacion Guanacaste | Sector El Hacha      | Sendero Tigre       | 11.0317  | -85.5262  | 280  | Lucia Rios        |
| DHJPAR0001788 | HIC1304-05 | 623 | DO348203 |  | 30-May-1997 | Belvosia Woodley03C | Hyleisia continua   | Saturniidae | 97-SRNP-4013     | Area de Conservacion Guanacaste | Sector El Hacha      | Sendero Bejuquilla  | 11.03    | -85.527   | 280  | Lucia Rios        |
| DHJPAR0001789 | HIC1305-05 | 623 | DO348204 |  | 17-Jun-1997 | Belvosia Woodley03C | Hyleisia continua   | Saturniidae | 97-SRNP-704.09   | Area de Conservacion Guanacaste | Sector Cacao         | Estacion Cacao      | 10.9269  | -85.4682  | 1150 | guaneros          |
| DHJPAR0001790 | HIC1306-05 | 623 | DO348205 |  | 20-May-1997 | Belvosia Woodley03C | Hyleisia continua   | Saturniidae | 97-SRNP-664.56   | Area de Conservacion Guanacaste | Sector Cacao         | Estacion Cacao      | 10.9269  | -85.4682  | 1150 | guaneros          |
| DHJPAR0001791 | HIC1307-05 | 419 | DO348206 |  | 27-Feb-1993 | Belvosia Woodley03C | Hyleisia lineata    | Saturniidae | 92-SRNP-6091.53  | Area de Conservacion Guanacaste | Sector Santa Rosa    | Cafetal             | 10.8583  | -85.6109  | 280  | guaneros          |
| DHJPAR0001792 | HIC1308-05 | 418 | DO348207 |  | 19-Jan-1993 | Belvosia Woodley03C | Hyleisia lineata    | Saturniidae | 92-SRNP-6064     | Area de Conservacion Guanacaste | Sector Santa Rosa    | Cafetal             | 10.8583  | -85.6109  | 280  | guaneros          |
| DHJPAR0001793 | HIC1309-05 | 339 | DO348208 |  | 10-Sep-1992 | Belvosia Woodley03C | Hyleisia lineata    | Saturniidae | 92-SRNP-4385     | Area de Conservacion Guanacaste | Sector Santa Rosa    | Cafetal             | 10.8583  | -85.6109  | 280  | guaneros          |
| DHJPAR0001794 | HIC1310-05 | 619 | DO348209 |  | 19-Sep-1992 | Belvosia Woodley03C | Hyleisia lineata    | Saturniidae | 92-SRNP-3718     | Area de Conservacion Guanacaste | Sector Santa Rosa    | Cafetal             | 10.8583  | -85.6109  | 280  | guaneros          |
| DHJPAR0001795 | HIC1311-05 | 620 | DO348210 |  | 21-Jan-1992 | Belvosia Woodley03C | Hyleisia lineata    | Saturniidae | 91-SRNP-3177     | Area de Conservacion Guanacaste | Sector Santa Rosa    | Bosque San Emilio   | 10.8439  | -85.6138  | 300  | guaneros          |
| DHJPAR0001796 | HIC1312-05 | 418 | DO348211 |  | 18-Jan-1991 | Belvosia Woodley03C | Hyleisia lineata    | Saturniidae | 90-SRNP-227.71   | Area de Conservacion Guanacaste | Sector Santa Rosa    | Bosque San Emilio   | 10.8439  | -85.6138  | 300  | guaneros          |
| DHJPAR0001831 | HIC1447-05 | 636 | DO348212 |  | 10-Jun-1997 | Belvosia Woodley03C | Hyleisia continua   | Saturniidae | 97-SRNP-704.21   | Area de Conservacion Guanacaste | Sector Cacao         | Estacion Cacao      | 10.9269  | -85.4682  | 1150 | guaneros          |
| DHJPAR0001932 | HIC1448-05 | 636 | DO348213 |  | 22-May-1997 | Belvosia Woodley03C | Hyleisia continua   | Saturniidae | 97-SRNP-704.07   | Area de Conservacion Guanacaste | Sector Cacao         | Estacion Cacao      | 10.9269  | -85.4682  | 1150 | guaneros          |
| DHJPAR0001933 | HIC1449-05 | 636 | DO348214 |  | 22-May-1997 | Belvosia Woodley03C | Hyleisia continua   | Saturniidae | 97-SRNP-704.06   | Area de Conservacion Guanacaste | Sector Cacao         | Estacion Cacao      | 10.9269  | -85.4682  | 1150 | guaneros          |
| DHJPAR0001934 | HIC1450-05 | 636 | DO348215 |  | 30-May-1997 | Belvosia Woodley03C | Hyleisia continua   | Saturniidae | 97-SRNP-704.04   | Area de Conservacion Guanacaste | Sector Cacao         | Estacion Cacao      | 10.9269  | -85.4682  | 1150 | guaneros          |
| DHJPAR0001935 | HIC1451-05 | 636 | DO348216 |  | 20-May-1997 | Belvosia Woodley03C | Hyleisia continua   | Saturniidae | 97-SRNP-654.61   | Area de Conservacion Guanacaste | Sector Cacao         | Estacion Cacao      | 10.9269  | -85.4682  | 1150 | guaneros          |
| DHJPAR0001936 | HIC1452-05 | 656 | DO348217 |  | 19-May-1997 | Belvosia Woodley03C | Hyleisia continua   | Saturniidae | 97-SRNP-664.14   | Area de Conservacion Guanacaste | Sector Cacao         | Estacion Cacao      | 10.9269  | -85.4682  | 1150 | guaneros          |
| DHJPAR0001938 | HIC1454-05 | 658 | DO348218 |  | 16-Jan-1997 | Belvosia Woodley03C | Hyleisia lineata    | Saturniidae | 96-SRNP-11578.76 | Area de Conservacion Guanacaste | Sector Santa Rosa    | Las Mesas           | 10.8465  | -85.60915 | 305  | guaneros          |
| DHJPAR0001939 | HIC1455-05 | 636 | DO348219 |  | 5-Jan-1997  | Belvosia Woodley03C | Hyleisia lineata    | Saturniidae | 96-SRNP-11578.13 | Area de Conservacion Guanacaste | Sector Santa Rosa    | Las Mesas           | 10.8465  | -85.60915 | 305  | guaneros          |
| DHJPAR0001940 | HIC1456-05 | 571 | DO348220 |  | 15-Feb-1993 | Belvosia Woodley03C | Hyleisia lineata    | Saturniidae | 92-SRNP-6090.60  | Area de Conservacion Guanacaste | Sector Santa Rosa    | Cafetal             | 10.85827 | -85.61089 | 280  | guaneros          |
| DHJPAR0001941 | HIC1457-05 | 658 | DO348221 |  | 15-Feb-1993 | Belvosia Woodley03C | Hyleisia lineata    | Saturniidae | 92-SRNP-6090.14  | Area de Conservacion Guanacaste | Sector Santa Rosa    | Cafetal             | 10.85827 | -85.61089 | 280  | guaneros          |
| DHJPAR0001942 | HIC1458-05 | 655 | DO348222 |  | 4-Feb-1993  | Belvosia Woodley03C | Hyleisia Janzen02   | Saturniidae | 92-SRNP-6086.112 | Area de Conservacion Guanacaste | Sector Santa Rosa    | Cafetal             | 10.85827 | -85.61089 | 280  | guaneros          |
| DHJPAR0001943 | HIC1459-05 | 658 | DO348223 |  | 26-Jan-1993 | Belvosia Woodley03C | Hyleisia Janzen02   | Saturniidae | 92-SRNP-6085.3   | Area de Conservacion Guanacaste | Sector Santa Rosa    | Cafetal             | 10.85827 | -85.61089 | 280  | guaneros          |
| DHJPAR0001944 | HIC1460-05 | 658 | DO348224 |  | 18-Jan-1993 | Belvosia Woodley03C | Hyleisia lineata    | Saturniidae | 92-SRNP-6069     | Area de Conservacion Guanacaste | Sector Santa Rosa    | Tanquetas           | 10.87078 | -85.60035 | 295  | guaneros          |
| DHJPAR0001945 | HIC1461-05 | 658 | DO348225 |  | 1-Oct-1992  | Belvosia Woodley03C | Hyleisia lineata    | Saturniidae | 92-SRNP-4081     | Area de Conservacion Guanacaste | Sector Santa Rosa    | Quebrada Costa Rica | 10.82745 | -85.63652 | 275  | guaneros          |
| DHJPAR0001946 | HIC1462-05 | 658 | DO348226 |  | 29-Jan-1992 | Belvosia Woodley03C | Hyleisia lineata    | Saturniidae | 91-SRNP-3178     | Area de Conservacion Guanacaste | Sector Santa Rosa    | Bosque San Emilio   | 10.84389 | -85.61384 | 300  | guaneros          |
| DHJPAR0001947 | HIC1463-05 | 658 | DO348227 |  | 9-Jan-1992  | Belvosia Woodley03C | Hyleisia lineata    | Saturniidae | 9                |                                 |                      |                     |          |           |      |                   |

|               |            |     |          |          |             |                     |                |            |               |                                 |                      |                        |            |           |     |                   |
|---------------|------------|-----|----------|----------|-------------|---------------------|----------------|------------|---------------|---------------------------------|----------------------|------------------------|------------|-----------|-----|-------------------|
| DHJPAR0001727 | HIC1245-05 | 658 | DQ348262 |          | 16-Jul-2000 | Belvosia Woodley04A | Eryio ocypte   | Springidae | 00-SRNP-7603  | Area de Conservacion Guanacaste | Sector Horizontes    | Quebrada San Pancho    | 10.7477    | -85.5858  | 90  | guaneros          |
| DHJPAR0001730 | HIC1248-05 | 590 | DQ348263 |          | 04-Jul-1999 | Belvosia Woodley04A | Eryio ocypte   | Springidae | 99-SRNP-8571  | Area de Conservacion Guanacaste | Sector Horizontes    | Quebrada San Pancho    | 10.7477    | -85.5858  | 90  | guaneros          |
| DHJPAR0001733 | HIC1251-05 | 658 | DQ348264 |          | 29-Jun-1999 | Belvosia Woodley04A | Eryio ocypte   | Springidae | 99-SRNP-8400  | Area de Conservacion Guanacaste | Sector Santa Rosa    | Bosque San Emilio      | 10.8439    | -85.6138  | 300 | guaneros          |
| DHJPAR0001736 | HIC1254-05 | 343 | DQ348265 |          | 23-Jun-1999 | Belvosia Woodley04A | Eryio ocypte   | Springidae | 99-SRNP-6224  | Area de Conservacion Guanacaste | Sector Santa Rosa    | Tanquetas              | 10.8708    | -85.6053  | 295 | Ruif Franco       |
| DHJPAR0001737 | HIC1255-05 | 592 | DQ348266 |          | 21-Jun-1999 | Belvosia Woodley04A | Eryio ocypte   | Springidae | 99-SRNP-6222  | Area de Conservacion Guanacaste | Sector Santa Rosa    | Tanquetas              | 10.8708    | -85.6053  | 295 | Elieth Carrillano |
| DHJPAR0001738 | HIC1256-05 | 658 | DQ348267 |          | 13-Jun-1999 | Belvosia Woodley04A | Eryio ocypte   | Springidae | 99-SRNP-6221  | Area de Conservacion Guanacaste | Sector Santa Rosa    | Tanquetas              | 10.8708    | -85.6053  | 295 | Elieth Carrillano |
| DHJPAR0001739 | HIC1257-05 | 658 | DQ348268 |          | 24-Feb-1999 | Belvosia Woodley04A | Eryio ocypte   | Springidae | 99-SRNP-6006  | Area de Conservacion Guanacaste | Sector Santa Rosa    | Mirador Santa Elena    | 10.8665    | -85.6089  | 305 | guaneros          |
| DHJPAR0001740 | HIC1258-05 | 373 | DQ348269 |          | 30-Dec-1998 | Belvosia Woodley04A | Eryio ocypte   | Springidae | 99-SRNP-12930 | Area de Conservacion Guanacaste | Sector Santa Rosa    | Alcarran               | 10.8925    | -85.6034  | 260 | guaneros          |
| DHJPAR0001741 | HIC1259-05 | 658 | DQ348270 |          | 07-Jan-1999 | Belvosia Woodley04A | Eryio ocypte   | Springidae | 99-SRNP-12925 | Area de Conservacion Guanacaste | Sector Santa Rosa    | Alcarran               | 10.8925    | -85.6034  | 260 | guaneros          |
| DHJPAR0001742 | HIC1260-05 | 609 | DQ348271 |          | 30-Dec-1998 | Belvosia Woodley04A | Eryio ocypte   | Springidae | 99-SRNP-12866 | Area de Conservacion Guanacaste | Sector Santa Rosa    | Alcarran               | 10.8925    | -85.6034  | 260 | Guillermo Pereira |
| DHJPAR0001743 | HIC1261-05 | 598 | DQ348272 |          | 10-Dec-1999 | Belvosia Woodley04A | Eryio ocypte   | Springidae | 99-SRNP-12837 | Area de Conservacion Guanacaste | Sector El Hacha      | Casa Uno               | 11.0056    | -85.5743  | 280 | Manuel Pereira    |
| DHJPAR0001744 | HIC1262-05 | 658 | DQ348273 |          | 01-Jan-1999 | Belvosia Woodley04A | Eryio ocypte   | Springidae | 99-SRNP-12764 | Area de Conservacion Guanacaste | Sector Santa Rosa    | Alcarran               | 10.8925    | -85.6034  | 260 | Manuel Pereira    |
| DHJPAR0001803 | HIC1319-05 | 418 | DQ348274 |          | 14-Jan-2003 | Belvosia Woodley04A | Eryio ocypte   | Springidae | 04-SRNP-56391 | Area de Conservacion Guanacaste | Sector Pailita       | Estacion Pailita       | 10.9893    | -85.4258  | 675 | Calixto Moraga    |
| DHJPAR0001804 | HIC1320-05 | 624 | DQ348275 |          | 03-Sep-2005 | Belvosia Woodley04A | Eryio ocypte   | Springidae | 03-SRNP-20161 | Area de Conservacion Guanacaste | Sector Pailita       | Pasmompa               | 11.0193    | -85.41    | 440 | Calixto Moraga    |
| DHJPAR0001805 | HIC1321-05 | 418 | DQ348276 |          | 30-Aug-2002 | Belvosia Woodley04A | Eryio ocypte   | Springidae | 03-SRNP-16753 | Area de Conservacion Guanacaste | Del Oro              | Puente Mena            | 11.0456    | -85.4574  | 280 | Manuel Pereira    |
| DHJPAR0001807 | HIC1323-05 | 621 | DQ348277 |          | 24-Jul-2003 | Belvosia Woodley04A | Eryio ocypte   | Springidae | 03-SRNP-15964 | Area de Conservacion Guanacaste | Del Oro              | Quebrada Trigal        | 11.0228    | -85.4955  | 290 | Manuel Pereira    |
| DHJPAR0001808 | HIC1324-05 | 418 | DQ348278 |          | 11-Jul-2003 | Belvosia Woodley04A | Eryio ocypte   | Springidae | 03-SRNP-2850  | Area de Conservacion Guanacaste | Del Oro              | Quebrada Trigal        | 11.0228    | -85.4955  | 290 | Roster Moraga     |
| DHJPAR0001809 | HIC1325-05 | 418 | DQ348279 |          | 21-Jul-2003 | Belvosia Woodley04A | Eryio ocypte   | Springidae | 03-SRNP-2794  | Area de Conservacion Guanacaste | Del Oro              | Quebrada Trigal        | 11.0228    | -85.4955  | 290 | Manuel Pereira    |
| DHJPAR0001818 | HIC1334-05 | 418 | DQ348280 |          | 01-Jul-2002 | Belvosia Woodley04A | Eryio ocypte   | Springidae | 02-SRNP-17718 | Area de Conservacion Guanacaste | Sector El Hacha      | Finca Arroya           | 11.0154    | -85.5113  | 295 | Manuel Pereira    |
| DHJPAR0001821 | HIC1337-05 | 418 | DQ348281 |          | 20-Jul-2002 | Belvosia Woodley04A | Eryio ocypte   | Springidae | 02-SRNP-15955 | Area de Conservacion Guanacaste | Sector El Hacha      | Finca Arroya           | 11.0154    | -85.5113  | 295 | Manuel Pereira    |
| DHJPAR0001822 | HIC1338-05 | 418 | DQ348282 |          | 22-Jul-2002 | Belvosia Woodley04A | Eryio ocypte   | Springidae | 02-SRNP-15738 | Area de Conservacion Guanacaste | Sector El Hacha      | Finca Arroya           | 11.0154    | -85.5113  | 295 | Elieth Carrillano |
| DHJPAR0002010 | HIC1526-05 | 624 | DQ348283 |          | 24-Jul-2002 | Belvosia Woodley04A | Unzella jagux  | Springidae | 02-SRNP-15733 | Area de Conservacion Guanacaste | Sector El Hacha      | Finca Arroya           | 11.0154    | -85.5126  | 295 | Dunia Garcia      |
| DHJPAR0002012 | HIC1528-05 | 641 | DQ348284 |          | 19-May-2002 | Belvosia Woodley04A | Unzella jagux  | Springidae | 02-SRNP-6734  | Area de Conservacion Guanacaste | Rincon Rainforest    | Sendero Rincon         | 10.8962    | -85.2769  | 430 | Jose Perez        |
| DHJPAR0002014 | HIC1530-05 | 632 | DQ348285 |          | 26-Jan-2003 | Belvosia Woodley04A | Unzella jagux  | Springidae | 01-SRNP-23513 | Area de Conservacion Guanacaste | Rincon Rainforest    | Sendero Rincon         | 10.8962    | -85.2769  | 430 | Jose Perez        |
| DHJPAR0002015 | HIC1531-05 | 658 | DQ348286 |          | 16-Jan-2002 | Belvosia Woodley04A | Unzella jagux  | Springidae | 01-SRNP-23408 | Area de Conservacion Guanacaste | Rincon Rainforest    | Sendero Annas          | 10.90528   | -85.2782  | 405 | Jose Perez        |
| DHJPAR0002021 | HIC1541-05 | 632 | DQ348287 |          | 15-Mar-1999 | Belvosia Woodley04A | Eryio ocypte   | Springidae | 99-SRNP-2157  | Area de Conservacion Guanacaste | Del Oro              | Quebrada Serrano       | 11.00225   | -85.45614 | 585 | Lucia Rios        |
| DHJPAR0002031 | HIC1547-05 | 658 | DQ348288 | DQ347662 | 21-Jan-1998 | Belvosia Woodley04A | Unzella jagux  | Springidae | 99-SRNP-4234  | Area de Conservacion Guanacaste | Del Oro              | Quebrada Serrano       | 11.00225   | -85.45614 | 585 | guaneros          |
| DHJPAR0002034 | HIC1550-05 | 632 | DQ348289 | DQ347663 | 11-Jan-1998 | Belvosia Woodley04A | Eryio ocypte   | Springidae | 99-SRNP-11351 | Area de Conservacion Guanacaste | Sector Pocosol       | Quebrada Aseradero     | 10.89557   | -85.56419 | 160 | guaneros          |
| DHJPAR0002035 | HIC1551-05 | 632 | DQ348290 | DQ347664 | 3-Dec-1995  | Belvosia Woodley04A | Aleuron iphis  | Springidae | 99-SRNP-10445 | Area de Conservacion Guanacaste | Sector Santa Rosa    | Bosque Humedo          | 10.85145   | -85.60801 | 290 | guaneros          |
| DHJPAR0002036 | HIC1552-05 | 638 | DQ348291 | DQ347665 | 27-Nov-1995 | Belvosia Woodley04A | Aleuron iphis  | Springidae | 99-SRNP-10338 | Area de Conservacion Guanacaste | Sector Santa Rosa    | Bosque Humedo          | 10.85145   | -85.60801 | 290 | guaneros          |
| DHJPAR0002037 | HIC1553-05 | 658 | DQ348292 | DQ347666 | 1-Nov-1995  | Belvosia Woodley04A | Unzella pronoe | Springidae | 99-SRNP-9428  | Area de Conservacion Guanacaste | Sector Santa Rosa    | Bosque Humedo          | 10.85145   | -85.60801 | 290 | guaneros          |
| DHJPAR0002048 | HIC1564-05 | 658 | DQ348293 | DQ347672 | 9-Mar-2005  | Belvosia Woodley04A | Eryio ocypte   | Springidae | 04-SRNP-56887 | Area de Conservacion Guanacaste | Sector Pailita       | Pasmompa               | 11.01926   | -85.40997 | 440 | Petrona Rios      |
| DHJPAR0002049 | HIC1565-05 | 632 | DQ348294 |          | 4-Feb-2005  | Belvosia Woodley04A | Eryio ocypte   | Springidae | 04-SRNP-56652 | Area de Conservacion Guanacaste | Sector Pailita       | Ingas                  | 11.00311   | -85.42041 | 580 | Manuel Rios       |
| DHJPAR0002050 | HIC1566-05 | 632 | DQ348295 |          | 22-Sep-2003 | Belvosia Woodley04A | Eryio ocypte   | Springidae | 03-SRNP-20248 | Area de Conservacion Guanacaste | Sector Pailita       | Pasmompa               | 11.01926   | -85.40997 | 440 | Petrona Rios      |
| DHJPAR0002051 | HIC1567-05 | 658 | DQ348296 | DQ347673 | 22-Sep-2003 | Belvosia Woodley04A | Eryio ocypte   | Springidae | 03-SRNP-20246 | Area de Conservacion Guanacaste | Sector Pailita       | Pasmompa               | 11.01926   | -85.40997 | 440 | Petrona Rios      |
| DHJPAR0002052 | HIC1568-05 | 603 | DQ348297 |          | 5-Sep-2003  | Belvosia Woodley04A | Eryio ocypte   | Springidae | 03-SRNP-20093 | Area de Conservacion Guanacaste | Sector Pailita       | Estacion Pailita       | 10.98931   | -85.42581 | 675 | Calixto Moraga    |
| DHJPAR0002055 | HIC1571-05 | 632 | DQ348298 | DQ347675 | 8-Jul-2003  | Belvosia Woodley04A | Eryio ocypte   | Springidae | 03-SRNP-2804  | Area de Conservacion Guanacaste | Del Oro              | Quebrada Trigal        | 11.02281   | -85.49547 | 290 | Lucia Rios        |
| DHJPAR0002059 | HIC1574-05 | 574 | DQ348299 |          | 23-Jul-2002 | Belvosia Woodley04A | Eryio ocypte   | Springidae | 02-SRNP-15819 | Area de Conservacion Guanacaste | Sector El Hacha      | Sendero Bejuquilla     | 11.03004   | -85.52899 | 280 | Lucia Rios        |
| DHJPAR0002060 | HIC1575-05 | 624 | DQ348300 |          | 23-Jul-2002 | Belvosia Woodley04A | Eryio ocypte   | Springidae | 02-SRNP-15738 | Area de Conservacion Guanacaste | Sector El Hacha      | Finca Arroya           | 11.01541   | -85.5126  | 295 | Manuel Pereira    |
| DHJPAR0002061 | HIC1576-05 | 552 | DQ348301 |          | 18-Jul-2002 | Belvosia Woodley04A | Eryio ocypte   | Springidae | 02-SRNP-15481 | Area de Conservacion Guanacaste | Sector El Hacha      | Sendero Bejuquilla     | 11.03004   | -85.52899 | 280 | Lucia Rios        |
| DHJPAR0002062 | HIC1577-05 | 557 | DQ348302 |          | 16-Jul-2002 | Belvosia Woodley04A | Eryio ocypte   | Springidae | 02-SRNP-15480 | Area de Conservacion Guanacaste | Sector El Hacha      | Sendero Bejuquilla     | 11.03004   | -85.52899 | 280 | Lucia Rios        |
| DHJPAR0002063 | HIC1578-05 | 610 | DQ348303 |          | 26-Jul-2002 | Belvosia Woodley04A | Eryio ocypte   | Springidae | 02-SRNP-15382 | Area de Conservacion Guanacaste | Sector El Hacha      | Finca Arroya           | 11.01541   | -85.5126  | 295 | Manuel Pereira    |
| DHJPAR0002064 | HIC1579-05 | 636 | DQ348304 |          | 14-Jul-2002 | Belvosia Woodley04A | Eryio ocypte   | Springidae | 02-SRNP-15380 | Area de Conservacion Guanacaste | Sector El Hacha      | Finca Arroya           | 11.01541   | -85.5126  | 295 | Manuel Pereira    |
| DHJPAR0002066 | HIC1581-05 | 633 | DQ348305 |          | 24-Jul-2002 | Belvosia Woodley04A | Eryio ocypte   | Springidae | 02-SRNP-15375 | Area de Conservacion Guanacaste | Sector El Hacha      | Finca Arroya           | 11.01541   | -85.5126  | 295 | Dunia Garcia      |
| DHJPAR0002068 | HIC1583-05 | 635 | DQ348306 |          | 24-Jul-2002 | Belvosia Woodley04A | Eryio ocypte   | Springidae | 02-SRNP-15854 | Area de Conservacion Guanacaste | Sector El Hacha      | Finca Arroya           | 11.01541   | -85.5126  | 295 | Manuel Pereira    |
| DHJPAR0002069 | HIC1584-05 | 543 | DQ348307 |          | 21-Jul-2002 | Belvosia Woodley04A | Eryio ocypte   | Springidae | 02-SRNP-16296 | Area de Conservacion Guanacaste | Sector El Hacha      | Finca Arroya           | 11.01541   | -85.5126  | 295 | Elieth Carrillano |
| DHJPAR0002070 | HIC1585-05 | 289 | DQ348308 |          | 18-Jul-2002 | Belvosia Woodley04A | Eryio ocypte   | Springidae | 02-SRNP-16297 | Area de Conservacion Guanacaste | Sector El Hacha      | Finca Arroya           | 11.01541   | -85.5126  | 295 | Elieth Carrillano |
| DHJPAR0002071 | HIC1586-05 | 320 | DQ348309 |          | 27-Jul-2002 | Belvosia Woodley04A | Eryio ocypte   | Springidae | 02-SRNP-16488 | Area de Conservacion Guanacaste | Sector El Hacha      | Finca Arroya           | 11.01541   | -85.5126  | 295 | Dunia Garcia      |
| DHJPAR0002072 | HIC1587-05 | 323 | DQ348310 |          | 2-Aug-2002  | Belvosia Woodley04A | Eryio ocypte   | Springidae | 02-SRNP-16702 | Area de Conservacion Guanacaste | Sector El Hacha      | Finca Arroya           | 11.01541   | -85.5126  | 295 | Roster Moraga     |
| DHJPAR0002073 | HIC1588-05 | 624 | DQ348311 |          | 26-Jul-2002 | Belvosia Woodley04A | Eryio ocypte   | Springidae | 02-SRNP-16704 | Area de Conservacion Guanacaste | Sector El Hacha      | Finca Arroya           | 11.01541   | -85.5126  | 295 | Manuel Pereira    |
| DHJPAR0002074 | HIC1589-05 | 632 | DQ348312 |          | 15-Jul-2002 | Belvosia Woodley04A | Eryio ocypte   | Springidae | 02-SRNP-15389 | Area de Conservacion Guanacaste | Sector El Hacha      | Finca Arroya           | 11.01541   | -85.5126  | 295 | Manuel Pereira    |
| DHJPAR0002075 | HIC1590-05 | 635 | DQ348313 |          | 17-Jul-2002 | Belvosia Woodley04A | Eryio ocypte   | Springidae | 02-SRNP-15107 | Area de Conservacion Guanacaste | Sector El Hacha      | Finca Arroya           | 11.01541   | -85.5126  | 295 | Dunia Garcia      |
| DHJPAR0002076 | HIC1591-05 | 577 | DQ348314 |          | 13-Jul-2002 | Belvosia Woodley04A | Eryio ocypte   | Springidae | 02-SRNP-15106 | Area de Conservacion Guanacaste | Sector El Hacha      | Finca Arroya           | 11.01541   | -85.5126  | 295 | Manuel Pereira    |
| DHJPAR0002078 | HIC1593-05 | 630 | DQ348315 |          | 5-Jul-2002  | Belvosia Woodley04A | Eryio ocypte   | Springidae | 02-SRNP-14979 | Area de Conservacion Guanacaste | Del Oro              | Bosque Aguare          | 11.0096    | -85.438   | 620 | Dunia Garcia      |
| DHJPAR0002081 | HIC1596-05 | 295 | DQ348316 |          | 5-Jul-2001  | Belvosia Woodley04A | Eryio ocypte   | Springidae | 01-SRNP-12436 | Area de Conservacion Guanacaste | Pomeriles            | Rio Azulado            | 10.81224   | -85.54438 | 65  | guaneros          |
| DHJPAR0002082 | HIC1597-05 | 328 | DQ348317 |          | 29-Jun-2001 | Belvosia Woodley04A | Eryio ocypte   | Springidae | 01-SRNP-9476  | Area de Conservacion Guanacaste | Sector El Hacha      | Estacion Los Almendros | 11.02845   | -85.52777 | 290 | Lucia Rios        |
| DHJPAR0002083 | HIC1598-05 | 326 | DQ348318 |          | 3-Jul-2001  | Belvosia Woodley04A | Eryio ocypte   | Springidae | 01-SRNP-9435  | Area de Conservacion Guanacaste | Sector El Hacha      | Estacion Los Almendros | 11.02845   | -85.52777 | 290 | Lucia Rios        |
| DHJPAR0002085 | HIC1600-05 | 636 | DQ348319 |          | 15-Apr-2001 | Belvosia Woodley04A | Eryio ocypte   | Springidae | 01-SRNP-483   | Area de Conservacion Guanacaste | Sector San Cristobal | Rio Blanco Abap        | 10.90337   | -85.37254 | 500 | Freddy Quesada    |
| DHJPAR0002086 | HIC1601-05 | 631 | DQ348320 |          | 2-Feb-2001  | Belvosia Woodley04A | Eryio ocypte   | Springidae | 02-SRNP-21074 | Area de Conservacion Guanacaste | Rincon Rainforest    | Estacion Caribe        | 10.90187   | -85.27495 | 415 | Jose Perez        |
| DHJPAR0002088 | HIC1603-05 | 613 | DQ348321 |          | 12-Nov-2000 | Belvosia Woodley04A | Eryio ocypte   | Springidae | 02-SRNP-14771 | Area de Conservacion Guanacaste | Rincon Rainforest    | Sendero Perya          | 10.89928   | -85.27486 | 420 | Freyd Vargas      |
| DHJPAR0002090 | HIC1605-05 | 610 | DQ348322 |          | 26-Sep-2000 | Belvosia Woodley04A | Eryio ocypte   | Springidae | 02-SRNP-14140 | Area de Conservacion Guanacaste | Rincon Rainforest    | Estacion Caribe        | 10.90187   | -85.27495 | 415 | Freyd Vargas      |
| DHJPAR0002091 | HIC1606-05 | 610 | DQ348323 | DQ347679 | 21-Jul-2000 | Belvosia Woodley04A | Eryio ocypte   | Springidae | 02-SRNP-7336  | Area de Conservacion Guanacaste | Sector Horizontes    | Quebrada San Pancho    | 10.74769   | -85.58577 | 90  | guaneros          |
| DHJPAR0002092 | HIC1607-05 | 605 | DQ348324 |          | 17-Jul-2000 | Belvosia Woodley04A | Eryio ocypte   | Springidae | 02-SRNP-7258  | Area de Conservacion Guanacaste | Sector Horizontes    | Quebrada San Pancho    | 10.74769   | -85.58577 | 90  | guaneros          |
| DHJPAR0002094 | HIC1609-05 | 325 | DQ348325 |          | 16-Jul-2000 | Belvosia Woodley04A | Eryio ocypte   | Springidae | 02-SRNP-7198  | Area de Conservacion Guanacaste | Sector Horizontes    | Quebrada San Pancho    | 10.74769   | -85.58577 | 90  | guaneros          |
| DHJPAR0002095 | HIC1610-05 | 325 | DQ348326 |          | 13-Jul-2000 | Belvosia Woodley04A | Eryio ocypte   | Springidae | 02-SRNP-7189  | Area de Conservacion Guanacaste | Sector Horizontes    | Quebrada San Pancho    | 10.74769   | -85.58577 | 90  | guaneros          |
| DHJPAR0002096 | HIC1611-05 | 574 | DQ348327 | DQ347681 | 3-Jul-1999  | Belvosia Woodley04A | Eryio ocypte   | Springidae | 99-SRNP-8566  | Area de Conservacion Guanacaste | Sector Horizontes    | Quebrada San Pancho    | 10.74769</ |           |     |                   |

|               |             |     |          |          |             |                     |                |            |               |                                 |                    |                        |          |           |     |                      |
|---------------|-------------|-----|----------|----------|-------------|---------------------|----------------|------------|---------------|---------------------------------|--------------------|------------------------|----------|-----------|-----|----------------------|
| DHJPAR0002115 | HICIC630-05 | 636 | DQ348342 |          | 30-Sep-1998 | Belvosia Woodley04A | Eryno ocyptae  | Sphingidae | 96-SRNP-5934  | Area de Conservacion Guanacaste | Sector El Hacha    | Estacion Los Almendros | 11.02845 | -85.52777 | 290 | Lucia Rios           |
| DHJPAR0002116 | HICIC631-05 | 610 | DQ348343 |          | 30-Sep-1998 | Belvosia Woodley04A | Eryno ocyptae  | Sphingidae | 96-SRNP-5937  | Area de Conservacion Guanacaste | Sector El Hacha    | Estacion Los Almendros | 11.02845 | -85.52777 | 290 | Lucia Rios           |
| DHJPAR0002117 | HICIC632-05 | 606 | DQ348344 |          | 3-Oct-1998  | Belvosia Woodley04A | Eryno ocyptae  | Sphingidae | 96-SRNP-5966  | Area de Conservacion Guanacaste | Sector El Hacha    | Estacion Los Almendros | 11.02845 | -85.52777 | 290 | Lucia Rios           |
| DHJPAR0002118 | HICIC633-05 | 322 | DQ348345 | DQ347688 | 30-Sep-1998 | Belvosia Woodley04A | Eryno ocyptae  | Sphingidae | 96-SRNP-5969  | Area de Conservacion Guanacaste | Sector El Hacha    | Estacion Los Almendros | 11.02845 | -85.52777 | 290 | Lucia Rios           |
| DHJPAR0002119 | HICIC634-05 | 636 | DQ348346 | DQ347689 | 12-Nov-1998 | Belvosia Woodley04A | Eryno ocyptae  | Sphingidae | 96-SRNP-12219 | Area de Conservacion Guanacaste | Sector Pocosol     | Vado Terciopelo        | 10.90756 | -85.56914 | 170 | Manuel Pereira       |
| DHJPAR0002120 | HICIC635-05 | 658 | DQ348347 | DQ347690 | 10-Nov-1998 | Belvosia Woodley04A | Eryno ocyptae  | Sphingidae | 96-SRNP-12222 | Area de Conservacion Guanacaste | Sector Pocosol     | Vado Terciopelo        | 10.90756 | -85.56914 | 170 | Manuel Pereira       |
| DHJPAR0002121 | HICIC636-05 | 636 | DQ348348 |          | 8-Oct-1998  | Belvosia Woodley04A | Eryno ocyptae  | Sphingidae | 96-SRNP-5970  | Area de Conservacion Guanacaste | Sector El Hacha    | Estacion Los Almendros | 11.02845 | -85.52777 | 290 | Lucia Rios           |
| DHJPAR0002122 | HICIC637-05 | 636 | DQ348349 | DQ347691 | 11-Aug-1997 | Belvosia Woodley04A | Eryno ocyptae  | Sphingidae | 97-SRNP-2862  | Area de Conservacion Guanacaste | Sector Santa Rosa  | Boquete Humedo         | 10.85145 | -85.60001 | 290 | guaneros             |
| DHJPAR0002123 | HICIC638-05 | 636 | DQ348350 |          | 15-Aug-1997 | Belvosia Woodley04A | Eryno ocyptae  | Sphingidae | 97-SRNP-2945  | Area de Conservacion Guanacaste | Sector Pocosol     | Estacion Pocosol       | 10.89131 | -85.59798 | 260 | Elieth Carrillano    |
| DHJPAR0002124 | HICIC639-05 | 636 | DQ348351 |          | 1-Aug-1997  | Belvosia Woodley04A | Eryno ocyptae  | Sphingidae | 97-SRNP-2946  | Area de Conservacion Guanacaste | Sector Pocosol     | Estacion Pocosol       | 10.89131 | -85.59798 | 260 | Elieth Carrillano    |
| DHJPAR0002125 | HICIC640-05 | 636 | DQ348352 |          | 5-Aug-1997  | Belvosia Woodley04A | Eryno ocyptae  | Sphingidae | 97-SRNP-3188  | Area de Conservacion Guanacaste | Sector Santa Rosa  | Boquete San Emilio     | 10.84389 | -85.61384 | 300 | Guillermo Pereira    |
| DHJPAR0002126 | HICIC641-05 | 636 | DQ348353 |          | 3-Aug-1997  | Belvosia Woodley04A | Eryno ocyptae  | Sphingidae | 97-SRNP-3208  | Area de Conservacion Guanacaste | Sector Santa Rosa  | Boquete San Emilio     | 10.84389 | -85.61384 | 300 | guaneros             |
| DHJPAR0002128 | HICIC643-05 | 610 | DQ348354 |          | 21-Jul-1997 | Belvosia Woodley04A | Eryno ocyptae  | Sphingidae | 97-SRNP-2461  | Area de Conservacion Guanacaste | Sector Horizontes  | Vado Esteron           | 10.76271 | -85.56004 | 95  | guaneros             |
| DHJPAR0002129 | HICIC644-05 | 636 | DQ348355 | DQ347692 | 23-Jul-1997 | Belvosia Woodley04A | Eryno ocyptae  | Sphingidae | 97-SRNP-2464  | Area de Conservacion Guanacaste | Sector Horizontes  | Vado Esteron           | 10.76271 | -85.56004 | 95  | guaneros             |
| DHJPAR0002130 | HICIC645-05 | 324 | DQ348356 |          | 20-Jul-1997 | Belvosia Woodley04A | Eryno ocyptae  | Sphingidae | 97-SRNP-2467  | Area de Conservacion Guanacaste | Sector Horizontes  | Vado Esteron           | 10.76271 | -85.56004 | 95  | guaneros             |
| DHJPAR0002131 | HICIC646-05 | 324 | DQ348357 | DQ347694 | 25-Jul-1997 | Belvosia Woodley04A | Eryno ocyptae  | Sphingidae | 97-SRNP-2478  | Area de Conservacion Guanacaste | Sector Santa Rosa  | Sendero Natural        | 10.83575 | -85.61253 | 290 | guaneros             |
| DHJPAR0002133 | HICIC648-05 | 636 | DQ348358 |          | 7-Aug-1997  | Belvosia Woodley04A | Eryno ocyptae  | Sphingidae | 97-SRNP-2536  | Area de Conservacion Guanacaste | Sector Horizontes  | Quebrada San Pancho    | 10.74769 | -85.58577 | 90  | guaneros             |
| DHJPAR0002134 | HICIC649-05 | 636 | DQ348359 |          | 9-Aug-1997  | Belvosia Woodley04A | Eryno ocyptae  | Sphingidae | 97-SRNP-2765  | Area de Conservacion Guanacaste | Sector Santa Rosa  | Boquete Humedo         | 10.85145 | -85.60001 | 290 | guaneros             |
| DHJPAR0002135 | HICIC650-05 | 636 | DQ348360 |          | 29-Jul-1997 | Belvosia Woodley04A | Eryno ocyptae  | Sphingidae | 97-SRNP-2857  | Area de Conservacion Guanacaste | Sector Santa Rosa  | Boquete Humedo         | 10.85145 | -85.60001 | 290 | guaneros             |
| DHJPAR0002136 | HICIC651-05 | 636 | DQ348361 |          | 24-Jul-1997 | Belvosia Woodley04A | Eryno ocyptae  | Sphingidae | 97-SRNP-2859  | Area de Conservacion Guanacaste | Sector Santa Rosa  | Boquete Humedo         | 10.85145 | -85.60001 | 290 | guaneros             |
| DHJPAR0002137 | HICIC652-05 | 636 | DQ348362 |          | 14-Mar-1997 | Belvosia Woodley04A | Eryno ocyptae  | Sphingidae | 97-SRNP-285   | Area de Conservacion Guanacaste | Sector Pocosol     | Vado Terciopelo        | 10.90756 | -85.56914 | 170 | guaneros             |
| DHJPAR0002138 | HICIC653-05 | 636 | DQ348363 | DQ347696 | 14-Jul-1997 | Belvosia Woodley04A | Eryno ocyptae  | Sphingidae | 97-SRNP-2460  | Area de Conservacion Guanacaste | Sector Horizontes  | Vado Esteron           | 10.76271 | -85.56004 | 95  | guaneros             |
| DHJPAR0002139 | HICIC654-05 | 636 | DQ348364 |          | 15-Jul-1997 | Belvosia Woodley04A | Eryno ocyptae  | Sphingidae | 97-SRNP-2462  | Area de Conservacion Guanacaste | Sector Horizontes  | Vado Esteron           | 10.76271 | -85.56004 | 95  | guaneros             |
| DHJPAR0002140 | HICIC655-05 | 323 | DQ348365 |          | 19-Jul-1997 | Belvosia Woodley04A | Eryno ocyptae  | Sphingidae | 97-SRNP-2465  | Area de Conservacion Guanacaste | Sector Horizontes  | Vado Esteron           | 10.76271 | -85.56004 | 95  | guaneros             |
| DHJPAR0002142 | HICIC657-05 | 601 | DQ348366 |          | 14-Jun-1994 | Belvosia Woodley04A | Eryno ocyptae  | Sphingidae | 94-SRNP-909   | Area de Conservacion Guanacaste | Sector Santa Rosa  | Tanquetas              | 10.87078 | -85.60356 | 295 | guaneros             |
| DHJPAR0002143 | HICIC658-05 | 632 | DQ348367 | DQ347697 | 11-Jun-1994 | Belvosia Woodley04A | Eryno ocyptae  | Sphingidae | 94-SRNP-922   | Area de Conservacion Guanacaste | Sector Santa Elena | Porton Perros          | 10.85991 | -85.63396 | 340 | guaneros             |
| DHJPAR0002144 | HICIC659-05 | 598 | DQ348368 |          | 17-Jun-1994 | Belvosia Woodley04A | Eryno ocyptae  | Sphingidae | 94-SRNP-927   | Area de Conservacion Guanacaste | Sector Santa Rosa  | Tanquetas              | 10.87078 | -85.60356 | 295 | guaneros             |
| DHJPAR0002145 | HICIC660-05 | 617 | DQ348369 | DQ347698 | 10-Aug-1996 | Belvosia Woodley04A | Eryno ocyptae  | Sphingidae | 96-SRNP-7031  | Area de Conservacion Guanacaste | Sector El Hacha    | Agua Buena             | 11.03239 | -85.57545 | 220 | guaneros             |
| DHJPAR0002146 | HICIC661-05 | 637 | DQ348370 | DQ347699 | 14-Aug-1996 | Belvosia Woodley04A | Eryno ocyptae  | Sphingidae | 96-SRNP-7030  | Area de Conservacion Guanacaste | Sector El Hacha    | Agua Buena             | 11.03239 | -85.57545 | 220 | guaneros             |
| DHJPAR0002147 | HICIC662-05 | 624 | DQ348371 |          | 23-Jun-1996 | Belvosia Woodley04A | Eryno ocyptae  | Sphingidae | 96-SRNP-1245  | Area de Conservacion Guanacaste | Sector Orosi       | Quebrada Las Yeguas    | 10.9616  | -85.49585 | 560 | guaneros             |
| DHJPAR0002148 | HICIC663-05 | 631 | DQ348372 | DQ347700 | 3-Jun-1996  | Belvosia Woodley04A | Eryno ocyptae  | Sphingidae | 96-SRNP-1186  | Area de Conservacion Guanacaste | Sector Orosi       | Mata Redonda           | 10.94106 | -85.50822 | 445 | guaneros             |
| DHJPAR0002149 | HICIC664-05 | 606 | DQ348373 |          | 17-Jun-1994 | Belvosia Woodley04A | Eryno ocyptae  | Sphingidae | 94-SRNP-937   | Area de Conservacion Guanacaste | Sector Pocosol     | Estacion Pocosol       | 10.89131 | -85.59798 | 260 | guaneros             |
| DHJPAR0002150 | HICIC665-05 | 595 | DQ348374 | DQ347701 | 10-Jun-1994 | Belvosia Woodley04A | Eryno ocyptae  | Sphingidae | 94-SRNP-945   | Area de Conservacion Guanacaste | Sector Santa Rosa  | Las Mesas              | 10.84653 | -85.60915 | 305 | guaneros             |
| DHJPAR0002151 | HICIC666-05 | 551 | DQ348375 |          | 19-Nov-1994 | Belvosia Woodley04A | Eryno ocyptae  | Sphingidae | 94-SRNP-9229  | Area de Conservacion Guanacaste | Sector Marino      | Isla San Jose          | 10.85434 | -85.61039 | 20  | guaneros             |
| DHJPAR0003585 | HICIC687-05 | 625 | DQ348257 |          | 13-Oct-2005 | Belvosia Woodley04A | Eryno ocyptae  | Sphingidae | 05-SRNP-23906 | Area de Conservacion Guanacaste | Del Oro            | Quebrada Romero        | 11.00519 | -85.47398 | 490 | Roster Moraga        |
| DHJPAR0003586 | HICIC689-05 | 419 | DQ348256 |          | 5-Sep-2005  | Belvosia Woodley04A | Eryno ocyptae  | Sphingidae | 05-SRNP-32772 | Area de Conservacion Guanacaste | Sector Pitilla     | Pasmopma               | 11.01926 | -85.49097 | 440 | Petrona Rios         |
| DHJPAR0003588 | HICIC690-05 | 625 | DQ348255 |          | 19-Sep-2005 | Belvosia Woodley04A | Eryno ocyptae  | Sphingidae | 05-SRNP-32675 | Area de Conservacion Guanacaste | Sector Pitilla     | Coneja                 | 11.01926 | -85.49097 | 440 | Petrona Rios         |
| DHJPAR0003604 | HICIC708-05 | 623 | DQ348254 |          | 21-May-2005 | Belvosia Woodley04A | Eryno ocyptae  | Sphingidae | 05-SRNP-31330 | Area de Conservacion Guanacaste | Sector Pitilla     | Ingas                  | 11.00311 | -85.42041 | 580 | Petrona Rios         |
| DHJPAR0003605 | HICIC709-05 | 625 | DQ348253 |          | 22-May-2005 | Belvosia Woodley04A | Eryno ocyptae  | Sphingidae | 05-SRNP-31327 | Area de Conservacion Guanacaste | Sector Pitilla     | Ingas                  | 11.00311 | -85.42041 | 580 | Petrona Rios         |
| DHJPAR0003606 | HICIC710-05 | 625 | DQ348252 |          | 26-May-2005 | Belvosia Woodley04A | Eryno ocyptae  | Sphingidae | 05-SRNP-31320 | Area de Conservacion Guanacaste | Sector Pitilla     | Ingas                  | 11.00311 | -85.42041 | 580 | Manuel Rios          |
| DHJPAR0003607 | HICIC711-05 | 626 | DQ348251 |          | 26-Jun-2005 | Belvosia Woodley04A | Eryno ocyptae  | Sphingidae | 05-SRNP-13529 | Area de Conservacion Guanacaste | Sector Santa Rosa  | Rio Azufrado           | 10.81224 | -85.54438 | 95  | Ruth Franco          |
| DHJPAR0003609 | HICIC713-05 | 624 | DQ348250 |          | 15-Mar-2005 | Belvosia Woodley04A | Eryno ocyptae  | Sphingidae | 05-SRNP-30003 | Area de Conservacion Guanacaste | Sector Pitilla     | Pasmopma               | 11.01926 | -85.49097 | 440 | Petrona Rios         |
| DHJPAR0003611 | HICIC715-05 | 625 | DQ348249 |          | 28-Apr-2005 | Belvosia Woodley04A | Eryno ocyptae  | Sphingidae | 05-SRNP-30976 | Area de Conservacion Guanacaste | Sector Pitilla     | Sendero Carica         | 10.99284 | -85.42936 | 660 | Petrona Rios         |
| DHJPAR0003612 | HICIC716-05 | 625 | DQ348248 |          | 1-May-2005  | Belvosia Woodley04A | Eryno ocyptae  | Sphingidae | 05-SRNP-30980 | Area de Conservacion Guanacaste | Sector Pitilla     | Sendero Carica         | 10.99284 | -85.42936 | 660 | Petrona Rios         |
| DHJPAR0003613 | HICIC717-05 | 626 | DQ348247 |          | 29-Apr-2005 | Belvosia Woodley04A | Eryno ocyptae  | Sphingidae | 05-SRNP-30984 | Area de Conservacion Guanacaste | Sector Pitilla     | Sendero Carica         | 10.99284 | -85.42936 | 660 | Petrona Rios         |
| DHJPAR0003614 | HICIC718-05 | 625 | DQ348246 |          | 29-Apr-2005 | Belvosia Woodley04A | Eryno ocyptae  | Sphingidae | 05-SRNP-30983 | Area de Conservacion Guanacaste | Sector Pitilla     | Sendero Carica         | 10.99284 | -85.42936 | 660 | Petrona Rios         |
| DHJPAR0003616 | HICIC720-05 | 625 | DQ348245 |          | 1-May-2005  | Belvosia Woodley04A | Eryno ocyptae  | Sphingidae | 05-SRNP-31034 | Area de Conservacion Guanacaste | Sector Pitilla     | Sendero Carica         | 10.99284 | -85.42936 | 660 | Petrona Rios         |
| DHJPAR0003618 | HICIC722-05 | 625 | DQ348244 |          | 23-May-2005 | Belvosia Woodley04A | Unzella pronoe | Sphingidae | 05-SRNP-31223 | Area de Conservacion Guanacaste | Sector Pitilla     | Sendero Nacho          | 10.98445 | -85.42461 | 710 | Manuel Rios          |
| DHJPAR0003619 | HICIC723-05 | 621 | DQ348243 |          | 28-Apr-2005 | Belvosia Woodley04A | Eryno ocyptae  | Sphingidae | 05-SRNP-30981 | Area de Conservacion Guanacaste | Sector Pitilla     | Sendero Carica         | 10.99284 | -85.42936 | 660 | Petrona Rios         |
| DHJPAR0003620 | HICIC724-05 | 625 | DQ348242 |          | 13-May-2005 | Belvosia Woodley04A | Eryno ocyptae  | Sphingidae | 05-SRNP-31249 | Area de Conservacion Guanacaste | Sector Pitilla     | Ingas                  | 11.00311 | -85.42041 | 580 | Petrona Rios         |
| DHJPAR0003621 | HICIC725-05 | 622 | DQ348241 |          | 20-May-2005 | Belvosia Woodley04A | Unzella japix  | Sphingidae | 05-SRNP-31250 | Area de Conservacion Guanacaste | Sector Pitilla     | Ingas                  | 11.00311 | -85.42041 | 580 | Petrona Rios         |
| DHJPAR0003622 | HICIC726-05 | 624 | DQ348240 |          | 23-May-2005 | Belvosia Woodley04A | Unzella japix  | Sphingidae | 05-SRNP-31251 | Area de Conservacion Guanacaste | Sector Pitilla     | Ingas                  | 11.00311 | -85.42041 | 580 | Petrona Rios         |
| DHJPAR0003623 | HICIC727-05 | 626 | DQ348239 |          | 17-May-2005 | Belvosia Woodley04A | Eryno ocyptae  | Sphingidae | 05-SRNP-31253 | Area de Conservacion Guanacaste | Sector Pitilla     | Ingas                  | 11.00311 | -85.42041 | 580 | Petrona Rios         |
| DHJPAR0003626 | HICIC730-05 | 628 | DQ348238 |          | 19-May-2005 | Belvosia Woodley04A | Eryno ocyptae  | Sphingidae | 05-SRNP-31309 | Area de Conservacion Guanacaste | Sector Pitilla     | Estacion Pitilla       | 10.98931 | -85.42581 | 675 | Petrona Rios         |
| DHJPAR0003627 | HICIC731-05 | 626 | DQ348237 |          | 26-May-2005 | Belvosia Woodley04A | Eryno ocyptae  | Sphingidae | 05-SRNP-31312 | Area de Conservacion Guanacaste | Sector Pitilla     | Ingas                  | 11.00311 | -85.42041 | 580 | Petrona Rios         |
| DHJPAR0003631 | HICIC735-05 | 626 | DQ348236 |          | 21-Jun-2005 | Belvosia Woodley04A | Eryno ocyptae  | Sphingidae | 05-SRNP-55989 | Area de Conservacion Guanacaste | Sector Mundo Nuevo | Punta de Plancha       | 11.01926 | -85.49097 | 440 | Jose Alberto Sanchez |
| DHJPAR0003632 | HICIC736-05 | 626 | DQ348235 |          | 25-May-2005 | Belvosia Woodley04A | Eryno ocyptae  | Sphingidae | 05-SRNP-31345 | Area de Conservacion Guanacaste | Sector Pitilla     | Ingas                  | 11.00311 | -85.42041 | 580 | Petrona Rios         |
| DHJPAR0003634 | HICIC739-05 | 626 | DQ348234 |          | 29-May-2005 | Belvosia Woodley04A | Eryno ocyptae  | Sphingidae | 05-SRNP-31388 | Area de Conservacion Guanacaste | Sector Pitilla     | Estacion Pitilla       | 10.98931 | -85.42581 | 675 | Petrona Rios         |
| DHJPAR0003636 | HICIC740-05 | 626 | DQ348233 |          | 21-May-2005 | Belvosia Woodley04A | Eryno ocyptae  | Sphingidae | 05-SRNP-31550 | Area de Conservacion Guanacaste | Sector Pitilla     | Estacion Pitilla       | 10.98931 | -85.42581 | 675 | Manuel Rios          |
| DHJPAR0003637 | HICIC741-05 | 626 | DQ348232 |          | 14-Jun-2005 | Belvosia Woodley04A | Eryno ocyptae  | Sphingidae | 05-SRNP-55889 | Area de Conservacion Guanacaste | Sector Mundo Nuevo | Cerro Gongora Pelado   | 11.01926 | -85.49097 | 440 | Jose Cortez          |
| DHJPAR0003651 | HICIC755-05 | 575 | DQ348231 |          | 22-Jul-2002 | Belvosia Woodley04A | Eryno ocyptae  | Sphingidae | 02-SRNP-15727 | Area de Conservacion Guanacaste | Sector El Hacha    | Finca Araya            | 11.01541 | -85.51125 | 295 | Manuel Pereira       |
| DHJPAR0003657 | HICIC761-05 | 282 | DQ348230 |          | 5-Aug-2000  | Belvosia Woodley04A | Eryno ocyptae  | Sphingidae | 00-SRNP-2988  | Area de Conservacion Guanacaste | Sector El Hacha    | Sendero Bejuquilla     | 11.03004 | -85.52699 | 280 | Roster Moraga        |
| DHJPAR0001103 | HICIC001-04 | 645 | DQ348390 |          | 26-Nov-2003 | Belvosia Woodley04B | Eryno ocyptae  | Sphingidae | 03-SRNP-30112 | Area de Conservacion Guanacaste | Sector Del Oro     | Guacimos               | 11.01454 | -85.47492 | 380 | Manuel Pereira       |
| DHJPAR0001271 | HICIC187-05 | 682 | DQ348391 | DQ347638 | 24-Jul-2003 | Belvosia Woodley04B | Eryno ocyptae  | Sphingidae | 03-SRNP-2813  | Area de Conservacion Guanacaste | Del Oro            | Quebrada Trigal        | 11.0268  | -85.4955  | 290 | Elieth Carrillano    |
| DHJPAR0001720 | HICIC238-05 | 626 | DQ348392 |          | 04-Jul-2001 | Belvosia Woodley04B | Eryno ocyptae  | Sphingidae | 01-SRNP-12492 | Area de Conservacion Guanacaste | Potrerillos        | Rio Azufrado           | 10.8122  | -85.5444  | 95  | guaneros             |

|               |            |     |          |          |             |                     |                |            |                 |                                 |                      |                        |          |           |     |                   |
|---------------|------------|-----|----------|----------|-------------|---------------------|----------------|------------|-----------------|---------------------------------|----------------------|------------------------|----------|-----------|-----|-------------------|
| DHJPAR0001823 | HIC1339-05 | 623 | DQ348408 |          | 27-Jul-2002 | Belvosia Woodley04B | Eryno ocyptete | Sphingidae | 02-SRNP-15568   | Area de Conservacion Guanacaste | Del Oro              | Uncaria                | 11.0175  | -85.4744  | 370 | Dunia Garcia      |
| DHJPAR0001826 | HIC1342-05 | 624 | DQ348409 | DQ347647 | 19-Feb-2002 | Belvosia Woodley04B | Eryno ocyptete | Sphingidae | 02-SRNP-10040   | Area de Conservacion Guanacaste | Potenillos           | Rio Azulrado           | 10.8122  | -85.5444  | 95  | guaneros          |
| DHJPAR0002018 | HIC1534-05 | 576 | DQ348410 | DQ347654 | 5-Dec-2001  | Belvosia Woodley04B | Unzela jaxix   | Sphingidae | 01-SRNP-11783   | Area de Conservacion Guanacaste | Del Oro              | Quebrada Raiz          | 11.02665 | -85.48669 | 280 | Roster Moraga     |
| DHJPAR0002046 | HIC1562-05 | 658 | DQ348411 | DQ347670 | 20-Apr-2005 | Belvosia Woodley04B | Eryno ocyptete | Sphingidae | 02-SRNP-21163   | Area de Conservacion Guanacaste | Del Oro              | Margarita              | 11.03234 | -85.43954 | 380 | Roster Moraga     |
| DHJPAR0002047 | HIC1563-05 | 658 | DQ348412 | DQ347671 | 27-May-2005 | Belvosia Woodley04B | Eryno ocyptete | Sphingidae | 02-SRNP-41089   | Area de Conservacion Guanacaste | Rincon Rainforest    | Sendero Tucan          | 10.90424 | -85.2712  | 410 | Minor Carmona     |
| DHJPAR0002053 | HIC1569-05 | 606 | DQ348413 |          | 24-Jul-2003 | Belvosia Woodley04B | Eryno ocyptete | Sphingidae | 01-SRNP-2806    | Area de Conservacion Guanacaste | Del Oro              | Quebrada Trigal        | 11.02681 | -85.49547 | 290 | Elieth Carrillano |
| DHJPAR0002054 | HIC1570-05 | 658 | DQ348414 | DQ347674 | 13-Jul-2003 | Belvosia Woodley04B | Eryno ocyptete | Sphingidae | 03-SRNP-2806    | Area de Conservacion Guanacaste | Del Oro              | Quebrada Trigal        | 11.02681 | -85.49547 | 290 | Lucia Rios        |
| DHJPAR0002056 | HIC1572-05 | 658 | DQ348415 |          | 21-Jul-2003 | Belvosia Woodley04B | Eryno ocyptete | Sphingidae | 01-SRNP-2787    | Area de Conservacion Guanacaste | Del Oro              | Quebrada Trigal        | 11.02681 | -85.49547 | 290 | Roster Moraga     |
| DHJPAR0002057 | HIC1573-05 | 323 | DQ348416 | DQ347676 | 29-Dec-2002 | Belvosia Woodley04B | Eryno ocyptete | Sphingidae | 02-SRNP-33029   | Area de Conservacion Guanacaste | Del Oro              | Sendero Puertas        | 11.01087 | -85.48817 | 400 | Elieth Carrillano |
| DHJPAR0002065 | HIC1580-05 | 636 | DQ348417 |          | 21-Jul-2002 | Belvosia Woodley04B | Eryno ocyptete | Sphingidae | 01-SRNP-15377   | Area de Conservacion Guanacaste | Sector El Hacha      | Finca Arraya           | 11.01541 | -85.51125 | 295 | Dunia Garcia      |
| DHJPAR0002067 | HIC1582-05 | 609 | DQ348418 |          | 14-Jul-2002 | Belvosia Woodley04B | Eryno ocyptete | Sphingidae | 02-SRNP-15371   | Area de Conservacion Guanacaste | Sector El Hacha      | Finca Arraya           | 11.01541 | -85.51125 | 295 | Manuel Pereira    |
| DHJPAR0002077 | HIC1582-05 | 658 | DQ348419 | DQ347677 | 18-Jul-2002 | Belvosia Woodley04B | Eryno ocyptete | Sphingidae | 02-SRNP-15105   | Area de Conservacion Guanacaste | Sector El Hacha      | Finca Arraya           | 11.01541 | -85.51125 | 295 | Dunia Garcia      |
| DHJPAR0002079 | HIC1584-05 | 636 | DQ348420 | DQ347678 | 7-Mar-2002  | Belvosia Woodley04B | Eryno ocyptete | Sphingidae | 02-SRNP-10234   | Area de Conservacion Guanacaste | Potenillos           | Rio Azulrado           | 10.81224 | -85.54438 | 95  | guaneros          |
| DHJPAR0002080 | HIC1595-05 | 610 | DQ348421 |          | 23-Jun-2001 | Belvosia Woodley04B | Eryno ocyptete | Sphingidae | 01-SRNP-12445   | Area de Conservacion Guanacaste | Potenillos           | Rio Azulrado           | 10.81224 | -85.54438 | 95  | guaneros          |
| DHJPAR0002087 | HIC1602-05 | 658 | DQ348422 |          | 2-Jan-2001  | Belvosia Woodley04B | Eryno ocyptete | Sphingidae | 00-SRNP-20928   | Area de Conservacion Guanacaste | Rincon Rainforest    | Camino Rio Francia     | 10.90425 | -85.28651 | 410 | Carolina Cano     |
| DHJPAR0002093 | HIC1608-05 | 325 | DQ348423 | DQ347680 | 17-Jul-2000 | Belvosia Woodley04B | Eryno ocyptete | Sphingidae | 01-SRNP-7208    | Area de Conservacion Guanacaste | Rincon Horizontes    | Quebrada San Pancho    | 10.74769 | -85.58577 | 90  | guaneros          |
| DHJPAR0002101 | HIC1616-05 | 636 | DQ348424 | DQ347683 | 1-Aug-1998  | Belvosia Woodley04B | Eryno ocyptete | Sphingidae | 01-SRNP-9071    | Area de Conservacion Guanacaste | Sector Santa Rosa    | Bosque San Emilio      | 10.84389 | -85.61384 | 300 | Manuel Pereira    |
| DHJPAR0002103 | HIC1618-05 | 636 | DQ348425 | DQ347684 | 12-Nov-1998 | Belvosia Woodley04B | Eryno ocyptete | Sphingidae | 01-SRNP-12218   | Area de Conservacion Guanacaste | Sector Pococot       | Vado Tercopelo         | 10.90756 | -85.58914 | 170 | Manuel Pereira    |
| DHJPAR0002132 | HIC1647-05 | 549 | DQ348426 | DQ347695 | 27-Jul-1997 | Belvosia Woodley04B | Eryno ocyptete | Sphingidae | 01-SRNP-5229    | Area de Conservacion Guanacaste | Sector Santa Rosa    | Laguna Escondida       | 10.84867 | -85.63846 | 285 | guaneros          |
| DHJPAR0002141 | HIC1659-05 | 601 | DQ348427 |          | 9-Jun-1994  | Belvosia Woodley04B | Eryno ocyptete | Sphingidae | 04-SRNP-681     | Area de Conservacion Guanacaste | Sector El Hacha      | Quebrada Jurco         | 10.97553 | -85.54628 | 290 | guaneros          |
| DHJPAR0002152 | HIC1667-05 | 609 | DQ348428 | DQ347702 | 17-Dec-1994 | Belvosia Woodley04B | Eryno ocyptete | Sphingidae | 04-SRNP-9846    | Area de Conservacion Guanacaste | Sector Pococot       | Quebrada Acaeradero    | 10.89517 | -85.56419 | 160 | guaneros          |
| DHJPAR0003602 | HIC1706-05 | 624 | DQ348389 |          | 30-Apr-2003 | Belvosia Woodley04B | Eryno ocyptete | Sphingidae | 01-SRNP-30975   | Area de Conservacion Guanacaste | Sector Pilla         | Sendero Carica         | 10.96294 | -85.42938 | 660 | Patrona Rios      |
| DHJPAR0003624 | HIC1728-05 | 626 | DQ348388 |          | 13-May-2005 | Belvosia Woodley04B | Unzela jaxix   | Sphingidae | 01-SRNP-31307   | Area de Conservacion Guanacaste | Sector Pilla         | Ingas                  | 11.00311 | -85.42041 | 580 | Manuel Rios       |
| DHJPAR0003628 | HIC1732-05 | 624 | DQ348387 |          | 26-May-2005 | Belvosia Woodley04B | Eryno ocyptete | Sphingidae | 01-SRNP-31313   | Area de Conservacion Guanacaste | Sector Pilla         | Ingas                  | 11.00311 | -85.42041 | 580 | Patrona Rios      |
| DHJPAR0003629 | HIC1733-05 | 625 | DQ348386 |          | 25-May-2005 | Belvosia Woodley04B | Eryno ocyptete | Sphingidae | 01-SRNP-31314   | Area de Conservacion Guanacaste | Sector Pilla         | Ingas                  | 11.00311 | -85.42041 | 580 | Patrona Rios      |
| DHJPAR0003633 | HIC1737-05 | 624 | DQ348385 |          | 26-May-2005 | Belvosia Woodley04B | Eryno ocyptete | Sphingidae | 01-SRNP-31384   | Area de Conservacion Guanacaste | Sector Pilla         | Estacion Pilla         | 10.98321 | -85.42581 | 675 | Patrona Rios      |
| DHJPAR0003647 | HIC1751-05 | 624 | DQ348384 |          | 17-Jul-2000 | Belvosia Woodley04B | Eryno ocyptete | Sphingidae | 02-SRNP-2624    | Area de Conservacion Guanacaste | Sector El Hacha      | Estacion Los Almendros | 11.02845 | -85.52777 | 290 | Lucia Rios        |
| DHJPAR0003648 | HIC1752-05 | 625 | DQ348383 |          | 14-Jul-2000 | Belvosia Woodley04B | Eryno ocyptete | Sphingidae | 02-SRNP-2624    | Area de Conservacion Guanacaste | Sector El Hacha      | Estacion Los Almendros | 11.02845 | -85.52777 | 290 | Lucia Rios        |
| DHJPAR0003649 | HIC1753-05 | 625 | DQ348382 |          | 8-Jul-2000  | Belvosia Woodley04B | Eryno ocyptete | Sphingidae | 02-SRNP-2627    | Area de Conservacion Guanacaste | Sector El Hacha      | Estacion Los Almendros | 11.02845 | -85.52777 | 290 | Lucia Rios        |
| DHJPAR0003650 | HIC1754-05 | 626 | DQ348381 |          | 7-Jul-2000  | Belvosia Woodley04B | Eryno ocyptete | Sphingidae | 02-SRNP-2635    | Area de Conservacion Guanacaste | Sector El Hacha      | Estacion Los Almendros | 11.02845 | -85.52777 | 290 | Lucia Rios        |
| DHJPAR0003652 | HIC1756-05 | 624 | DQ348380 |          | 12-Jul-2000 | Belvosia Woodley04B | Eryno ocyptete | Sphingidae | 02-SRNP-2647    | Area de Conservacion Guanacaste | Sector El Hacha      | Estacion Los Almendros | 11.02845 | -85.52777 | 290 | Lucia Rios        |
| DHJPAR0003653 | HIC1757-05 | 624 | DQ348379 |          | 12-Jul-2000 | Belvosia Woodley04B | Eryno ocyptete | Sphingidae | 02-SRNP-2662    | Area de Conservacion Guanacaste | Sector El Hacha      | Porton Cascaras        | 11.03184 | -85.52161 | 290 | Lucia Rios        |
| DHJPAR0003654 | HIC1758-05 | 625 | DQ348378 |          | 10-Jul-2000 | Belvosia Woodley04B | Eryno ocyptete | Sphingidae | 02-SRNP-2670    | Area de Conservacion Guanacaste | Sector El Hacha      | Estacion Los Almendros | 11.02845 | -85.52777 | 290 | Lucia Rios        |
| DHJPAR0003655 | HIC1759-05 | 623 | DQ348377 |          | 14-Jul-2000 | Belvosia Woodley04B | Eryno ocyptete | Sphingidae | 02-SRNP-2660    | Area de Conservacion Guanacaste | Sector El Hacha      | Porton Cascaras        | 11.03184 | -85.52161 | 290 | Lucia Rios        |
| DHJPAR0003656 | HIC1760-05 | 624 | DQ348376 |          | 6-Jul-2000  | Belvosia Woodley04B | Eryno ocyptete | Sphingidae | 02-SRNP-2612    | Area de Conservacion Guanacaste | Sector El Hacha      | Estacion Los Almendros | 11.02845 | -85.52777 | 290 | Lucia Rios        |
| DHJPAR0001104 | HIC1004-04 | 636 | DQ348432 |          | 1-Oct-2004  | Belvosia Woodley04C | Unzela jaxix   | Sphingidae | 03-SRNP-38045   | Area de Conservacion Guanacaste | Del Oro              | Quebrada Trigal        | 11.02681 | -85.49547 | 290 | Manuel Pereira    |
| DHJPAR0001105 | HIC1005-04 | 620 | DQ348433 |          | 17-Jan-2004 | Belvosia Woodley04C | Unzela jaxix   | Sphingidae | 01-SRNP-38050   | Area de Conservacion Guanacaste | Del Oro              | Guaucimos              | 11.01454 | -85.47492 | 380 | Manuel Pereira    |
| DHJPAR0001143 | HIC1015-05 | 662 | DQ348434 |          | 24-Jul-2004 | Belvosia Woodley04C | Unzela jaxix   | Sphingidae | 04-SRNP-41576   | Area de Conservacion Guanacaste | Rincon Rainforest    | Rio Francia Amba       | 10.8967  | -85.29    | 400 | Jose Perez        |
| DHJPAR0001144 | HIC1023-05 | 662 | DQ348435 |          | 05-Dec-2003 | Belvosia Woodley04C | Unzela jaxix   | Sphingidae | 03-SRNP-31198   | Area de Conservacion Guanacaste | Rincon Rainforest    | Sendero Anonas         | 10.9053  | -85.2788  | 405 | Minor Carmona     |
| DHJPAR0001145 | HIC1031-05 | 662 | DQ348436 |          | 25-Nov-2003 | Belvosia Woodley04C | Unzela jaxix   | Sphingidae | 03-SRNP-30109   | Area de Conservacion Guanacaste | Del Oro              | Guaucimos              | 11.0145  | -85.4749  | 380 | Manuel Pereira    |
| DHJPAR0001146 | HIC1039-05 | 662 | DQ348437 |          | 03-Oct-2003 | Belvosia Woodley04C | Unzela jaxix   | Sphingidae | 01-SRNP-28006   | Area de Conservacion Guanacaste | Del Oro              | Tangelo                | 11.0182  | -85.4502  | 410 | Lucia Rios        |
| DHJPAR0001147 | HIC1047-05 | 662 | DQ348438 |          | 22-Nov-2003 | Belvosia Woodley04C | Unzela jaxix   | Sphingidae | 03-SRNP-21295   | Area de Conservacion Guanacaste | Sector Pilla         | Pasmompa               | 11.0193  | -85.41    | 440 | Calixto Moraga    |
| DHJPAR0001148 | HIC1055-05 | 662 | DQ348439 |          | 17-Nov-2003 | Belvosia Woodley04C | Unzela jaxix   | Sphingidae | 01-SRNP-13083.1 | Area de Conservacion Guanacaste | Rincon Rainforest    | Camino Rio Francia     | 10.9043  | -85.2865  | 410 | Minor Carmona     |
| DHJPAR0001139 | HIC1080-05 | 662 | DQ348440 |          | 08-Nov-2004 | Belvosia Woodley04C | Unzela jaxix   | Sphingidae | 04-SRNP-55552   | Area de Conservacion Guanacaste | Sector Pilla         | Ingas                  | 11.0031  | -85.4204  | 580 | Manuel Rios       |
| DHJPAR0001140 | HIC1088-05 | 662 | DQ348441 |          | 18-Sep-2004 | Belvosia Woodley04C | Unzela jaxix   | Sphingidae | 04-SRNP-48039   | Area de Conservacion Guanacaste | Sector Cacao         | Quebrada Orillo        | 10.89    | -85.4797  | 550 | Mariano Pereira   |
| DHJPAR0001141 | HIC1096-05 | 662 | DQ348442 |          | 13-May-2004 | Belvosia Woodley04C | Unzela jaxix   | Sphingidae | 04-SRNP-40834   | Area de Conservacion Guanacaste | Rincon Rainforest    | Vado Rio Francia       | 10.9009  | -85.2691  | 400 | Ovaldo Espinoza   |
| DHJPAR0001142 | HIC104-05  | 562 | DQ348443 |          | 28-May-2004 | Belvosia Woodley04C | Unzela jaxix   | Sphingidae | 04-SRNP-41001   | Area de Conservacion Guanacaste | Rincon Rainforest    | Sendero Anonas         | 10.9053  | -85.2788  | 405 | Minor Carmona     |
| DHJPAR0001269 | HIC171-05  | 632 | DQ348444 |          | 09-Sep-2003 | Belvosia Woodley04C | Eryno ocyptete | Sphingidae | 03-SRNP-18276   | Area de Conservacion Guanacaste | Del Oro              | Quebrada Trigal        | 11.0268  | -85.4955  | 290 | Roster Moraga     |
| DHJPAR0001270 | HIC179-05  | 662 | DQ348445 |          | 23-Sep-2003 | Belvosia Woodley04C | Unzela jaxix   | Sphingidae | 03-SRNP-12100   | Area de Conservacion Guanacaste | Rincon Rainforest    | Sendero Venado         | 10.8968  | -85.27    | 420 | Minor Carmona     |
| DHJPAR0001272 | HIC195-05  | 662 | DQ348446 |          | 10-Jan-2003 | Belvosia Woodley04C | Unzela jaxix   | Sphingidae | 02-SRNP-33829   | Area de Conservacion Guanacaste | Del Oro              | Guaucimos              | 11.0145  | -85.4749  | 380 | Manuel Pereira    |
| DHJPAR0001797 | HIC1313-05 | 618 | DQ348447 |          | 15-Mar-2005 | Belvosia Woodley04C | Unzela jaxix   | Sphingidae | 01-SRNP-30252   | Area de Conservacion Guanacaste | Sector Pilla         | Pasmompa               | 11.0193  | -85.41    | 440 | Calixto Moraga    |
| DHJPAR0001798 | HIC1314-05 | 618 | DQ348448 |          | 5-Mar-2005  | Belvosia Woodley04C | Eryno ocyptete | Sphingidae | 01-SRNP-30238   | Area de Conservacion Guanacaste | Sector Pilla         | Pasmompa               | 11.0193  | -85.41    | 440 | Patrona Rios      |
| DHJPAR0001802 | HIC1316-05 | 630 | DQ348449 |          | 27-Jan-2005 | Belvosia Woodley04C | Eryno ocyptete | Sphingidae | 04-SRNP-56527   | Area de Conservacion Guanacaste | Sector Pilla         | Pasmompa               | 11.0193  | -85.41    | 440 | Patrona Rios      |
| DHJPAR0001810 | HIC1326-05 | 623 | DQ348450 |          | 19-Mar-2003 | Belvosia Woodley04C | Unzela jaxix   | Sphingidae | 03-SRNP-5214    | Area de Conservacion Guanacaste | Sector San Cristobal | Rio Blanco Abajo       | 10.9004  | -85.3725  | 500 | Ovaldo Espinoza   |
| DHJPAR0001811 | HIC1327-05 | 623 | DQ348451 |          | 30-Dec-2002 | Belvosia Woodley04C | Unzela jaxix   | Sphingidae | 02-SRNP-33443   | Area de Conservacion Guanacaste | Del Oro              | Puente Mena            | 11.0456  | -85.4674  | 380 | Manuel Pereira    |
| DHJPAR0001812 | HIC1328-05 | 623 | DQ348452 |          | 02-Jan-2003 | Belvosia Woodley04C | Unzela jaxix   | Sphingidae | 02-SRNP-33180   | Area de Conservacion Guanacaste | Del Oro              | Camino Mangos          | 11.0077  | -85.4793  | 480 | Dunia Garcia      |
| DHJPAR0001813 | HIC1329-05 | 623 | DQ348453 |          | 18-Jan-2003 | Belvosia Woodley04C | Unzela jaxix   | Sphingidae | 02-SRNP-32842   | Area de Conservacion Guanacaste | Sector Santa Rosa    | Catal                  | 10.8583  | -85.6109  | 380 | Ruth Franco       |
| DHJPAR0001814 | HIC1330-05 | 643 | DQ348454 |          | 15-Nov-2002 | Belvosia Woodley04C | Unzela jaxix   | Sphingidae | 02-SRNP-30603   | Area de Conservacion Guanacaste | Del Oro              | Quebrada Raiz          | 11.0287  | -85.4867  | 290 | Manuel Pereira    |
| DHJPAR0001817 | HIC1333-05 | 623 | DQ348455 |          | 11-Dec-2002 | Belvosia Woodley04C | Unzela jaxix   | Sphingidae | 02-SRNP-19624   | Area de Conservacion Guanacaste | Sector San Cristobal | Rio Blanco Abajo       | 10.9004  | -85.3725  | 500 | Ovaldo Espinoza   |
| DHJPAR0001819 | HIC1335-05 | 620 | DQ348456 |          | 04-Aug-2002 | Belvosia Woodley04C | Eryno ocyptete | Sphingidae | 02-SRNP-16709   | Area de Conservacion Guanacaste | Sector El Hacha      | Finca Arraya           | 11.0154  | -85.5113  | 295 | Elieth Carrillano |
| DHJPAR0001824 | HIC1340-05 | 618 | DQ348457 |          | 19-Jul-2002 | Belvosia Woodley04C | Alukon iphis   | Sphingidae | 02-SRNP-15113   | Area de Conservacion Guanacaste | Sector El Hacha      | Finca Arraya           | 11.0154  | -85.5113  | 295 | Lucia Rios        |
| DHJPAR0002004 | HIC1520-05 | 658 | DQ348458 |          | 24-Sep-2003 | Belvosia Woodley04C | Unzela jaxix   | Sphingidae | 01-SRNP-12173.1 | Area de Conservacion Guanacaste | Rincon Rainforest    | Estacion Caribe        | 10.90187 | -85.27495 | 415 | Armando Rios      |
| DHJPAR0002005 | HIC1521-05 | 636 | DQ348459 |          | 10-Jan-2003 | Belvosia Woodley04C | Unzela jaxix   | Sphingidae | 02-SRNP-33814   | Area de Conservacion Guanacaste | Del Oro              | Camino Mangos          | 11.00766 | -85.47926 | 480 | Manuel Pereira    |
| DHJPAR0002006 | HIC1522-05 | 636 | DQ348460 |          | 2-Jan-2003  | Belvosia Woodley04C | Unzela jaxix   | Sphingidae | 02-SRNP-33442   | Area de Conservacion Guanacaste | Sector El Hacha      | Finca Arraya           | 11.01541 | -85.51125 | 295 | Manuel Pereira    |
| DHJPAR0002007 | HIC1523-05 | 658 | DQ348461 | DQ347648 | 7-Jan-2003  | Belvosia Woodley04C | Unzela jaxix   | Sphingidae | 02-SRNP-33441   | Area de Conservacion Guanacaste | Sector El Hacha      | Finca Arraya           | 11.01541 | -85.51125 | 295 | Manuel Pereira    |
| DHJPAR0002    |            |     |          |          |             |                     |                |            |                 |                                 |                      |                        |          |           |     |                   |

|              |            |     |          |          |             |                     |                      |            |                 |                                 |                   |                     |          |           |     |                   |
|--------------|------------|-----|----------|----------|-------------|---------------------|----------------------|------------|-----------------|---------------------------------|-------------------|---------------------|----------|-----------|-----|-------------------|
| DHPAR0002089 | HIC1604-05 | 609 | DG348477 |          | 31-Oct-2000 | Belvisia Woodley04C | Enyo ocyptae         | Sphingidae | 00-SRNP-14683   | Area de Conservacion Guanacaste | Rincon Rainforest | Sendero Rincon      | 10.8962  | -85.27769 | 430 | Jose Perez        |
| DHPAR0003584 | HIC1688-05 | 623 | DG348431 |          | 1-Sep-2005  | Belvisia Woodley04C | Unzeia jaxix         | Sphingidae | 05-SRNP-23070   | Area de Conservacion Guanacaste | Del Oro           | Margarita           | 11.03234 | -85.43954 | 380 | Roster Moraga     |
| DHPAR0003630 | HIC1734-05 | 623 | DG348430 |          | 28-May-2005 | Belvisia Woodley04C | Enyo ocyptae         | Sphingidae | 05-SRNP-31315   | Area de Conservacion Guanacaste | Sector Pilla      | Ingas               | 11.00311 | -85.42041 | 580 | Petrona Rios      |
| DHPAR0004846 | HIC1750-05 | 419 | DG348429 |          | 18-Jun-2002 | Belvisia Woodley04C | Enyo ocyptae         | Sphingidae | 02-SRNP-15720   | Area de Conservacion Guanacaste | Sector El Hacha   | Finca Arroya        | 11.01541 | -85.51125 | 295 | Manuel Pereira    |
| DHPAR0001716 | HIC1234-05 | 658 | DG348485 |          | 12-Jun-2004 | Belvisia Woodley04D | Pachygonidia drucei  | Sphingidae | 04-SRNP-40980   | Area de Conservacion Guanacaste | Rincon Rainforest | Camino Rio Francia  | 10.9043  | -85.2865  | 410 | Maior Carmona     |
| DHPAR0001717 | HIC1235-05 | 626 | DG348486 |          | 20-Aug-2004 | Belvisia Woodley04D | Eumorphia satellitia | Sphingidae | 02-SRNP-13323   | Area de Conservacion Guanacaste | Sector Santa Rosa | Area Administrativa | 10.8376  | -85.6187  | 295 | Eric Olsen        |
| DHPAR0001724 | HIC1242-05 | 631 | DG348487 |          | 24-Jul-2000 | Belvisia Woodley04D | Eumorphia satellitia | Sphingidae | 00-SRNP-8888    | Area de Conservacion Guanacaste | Sector Santa Rosa | Cuesta Canyon Tigre | 10.817   | -85.6437  | 270 | guianeros         |
| DHPAR0001725 | HIC1243-05 | 574 | DG348488 |          | 24-Jul-2000 | Belvisia Woodley04D | Eumorphia satellitia | Sphingidae | 00-SRNP-8878    | Area de Conservacion Guanacaste | Sector Santa Rosa | Cuesta Canyon Tigre | 10.817   | -85.6437  | 270 | guianeros         |
| DHPAR0001729 | HIC1247-05 | 375 | DG348489 |          | 06-Jul-1999 | Belvisia Woodley04D | Eumorphia satellitia | Sphingidae | 99-SRNP-7252.1  | Area de Conservacion Guanacaste | Sector Santa Rosa | Sendero Carbonal    | 10.7759  | -85.658   | 7   | guianeros         |
| DHPAR0001801 | HIC1317-05 | 624 | DG348490 |          | 28-Feb-2005 | Belvisia Woodley04D | Enyo ocyptae         | Sphingidae | 04-SRNP-56681   | Area de Conservacion Guanacaste | Sector Pilla      | Pasmompa            | 11.0193  | -85.41    | 440 | Petrona Rios      |
| DHPAR0002023 | HIC1539-05 | 658 | DG348491 | DQ347658 | 7-Jul-1999  | Belvisia Woodley04D | Eumorphia satellitia | Sphingidae | 99-SRNP-7436    | Area de Conservacion Guanacaste | Sector Santa Rosa | Sendero Carbonal    | 10.77594 | -85.65799 | 7   | guianeros         |
| DHPAR0002024 | HIC1540-05 | 633 | DG348492 | DQ347659 | 18-Dec-1999 | Belvisia Woodley04D | Unzeia jaxix         | Sphingidae | 99-SRNP-15234   | Area de Conservacion Guanacaste | Del Oro           | Quebrada Serrano    | 11.00025 | -85.45614 | 585 | Roster Moraga     |
| DHPAR0002029 | HIC1545-05 | 633 | DG348493 | DQ347660 | 22-Jul-1998 | Belvisia Woodley04D | Eumorphia satellitia | Sphingidae | 99-SRNP-1815    | Area de Conservacion Guanacaste | Sector Santa Rosa | Cuesta Canyon Tigre | 10.81703 | -85.64366 | 270 | Guillermo Pereira |
| DHPAR0002030 | HIC1546-05 | 633 | DG348494 | DQ347661 | 29-Jul-1998 | Belvisia Woodley04D | Eumorphia satellitia | Sphingidae | 99-SRNP-1796    | Area de Conservacion Guanacaste | Sector Santa Rosa | Cuesta Canyon Tigre | 10.81703 | -85.64366 | 270 | Guillermo Pereira |
| DHPAR0002033 | HIC1549-05 | 614 | DG348495 |          | 17-Jul-1996 | Belvisia Woodley04D | Eumorphia satellitia | Sphingidae | 99-SRNP-4832    | Area de Conservacion Guanacaste | Sector Santa Rosa | Vado Nisperal       | 10.80212 | -85.65372 | 10  | guianeros         |
| DHPAR0002038 | HIC1554-05 | 658 | DG348496 | DQ347667 |             | Belvisia Woodley04D | Pachygonidia drucei  | Sphingidae | 99-SRNP-855     | Area de Conservacion Guanacaste | Sector Pilla      | Estacion Pilla      | 10.98931 | -85.42581 | 675 | guianeros         |
| DHPAR0002039 | HIC1555-05 | 614 | DG348497 |          | 30-Nov-1993 | Belvisia Woodley04D | Eumorphia satellitia | Sphingidae | 99-SRNP-7147    | Area de Conservacion Guanacaste | Sector Santa Rosa | Area Administrativa | 10.83764 | -85.61871 | 295 | guianeros         |
| DHPAR0002040 | HIC1556-05 | 614 | DG348498 | DQ347668 | 14-Oct-1991 | Belvisia Woodley04D | Pachygonidia drucei  | Sphingidae | 91-SRNP-2659    | Area de Conservacion Guanacaste | Sector Santa Rosa | Sendero Natural     | 10.83575 | -85.61253 | 290 | guianeros         |
| DHPAR0002041 | HIC1557-05 | 613 | DG348499 |          | 8-Aug-1990  | Belvisia Woodley04D | Eumorphia satellitia | Sphingidae | 99-SRNP-682     | Area de Conservacion Guanacaste | Sector Santa Rosa | Area Administrativa | 10.83764 | -85.61871 | 295 | guianeros         |
| DHPAR0002042 | HIC1558-05 | 613 | DG348500 | DQ347669 | 2-Aug-1990  | Belvisia Woodley04D | Eumorphia satellitia | Sphingidae | 99-SRNP-418     | Area de Conservacion Guanacaste | Sector Santa Rosa | Casona Santa Rosa   | 10.83391 | -85.61271 | 295 | guianeros         |
| DHPAR0002043 | HIC1559-05 | 613 | DG348501 |          | 29-Jul-1990 | Belvisia Woodley04D | Eumorphia satellitia | Sphingidae | 99-SRNP-313     | Area de Conservacion Guanacaste | Sector Santa Rosa | Cafetal             | 10.85827 | -85.61089 | 380 | guianeros         |
| DHPAR0002044 | HIC1560-05 | 613 | DG348502 |          | 28-Jul-1984 | Belvisia Woodley04D | Eumorphia satellitia | Sphingidae | 84-SRNP-776     | Area de Conservacion Guanacaste | Sector Santa Rosa | Cortafuegos Naranjo | 10.83255 | -85.62495 | 385 | Daniel H. Janzen  |
| DHPAR0002045 | HIC1561-05 | 327 | DG348503 |          | 23-Jul-1984 | Belvisia Woodley04D | Eumorphia satellitia | Sphingidae | 84-SRNP-518     | Area de Conservacion Guanacaste | Sector Santa Rosa | Quebrada Costa Rica | 10.82745 | -85.63852 | 275 | Daniel H. Janzen  |
| DHPAR0003603 | HIC1707-05 | 623 | DG348484 |          | 17-Jun-2005 | Belvisia Woodley04D | Pachygonidia drucei  | Sphingidae | 95-SRNP-31336   | Area de Conservacion Guanacaste | Sector Pilla      | Ingas               | 11.00311 | -85.42041 | 580 | Petrona Rios      |
| DHPAR0003608 | HIC1712-05 | 623 | DG348483 |          | 23-Mar-2005 | Belvisia Woodley04D | Enyo ocyptae         | Sphingidae | 95-SRNP-30223   | Area de Conservacion Guanacaste | Sector Pilla      | Pasmompa            | 11.01926 | -85.40997 | 440 | Petrona Rios      |
| DHPAR0003610 | HIC1714-05 | 624 | DG348482 |          | 10-May-2005 | Belvisia Woodley04D | Enyo ocyptae         | Sphingidae | 95-SRNP-30972   | Area de Conservacion Guanacaste | Sector Pilla      | Sendero Carica      | 10.98284 | -85.42936 | 660 | Petrona Rios      |
| DHPAR0003615 | HIC1719-05 | 625 | DG348481 |          | 10-May-2005 | Belvisia Woodley04D | Enyo ocyptae         | Sphingidae | 95-SRNP-30982   | Area de Conservacion Guanacaste | Sector Pilla      | Sendero Carica      | 10.98284 | -85.42936 | 660 | Petrona Rios      |
| DHPAR0003617 | HIC1721-05 | 625 | DG348480 |          | 25-May-2005 | Belvisia Woodley04D | Pachygonidia drucei  | Sphingidae | 95-SRNP-31069   | Area de Conservacion Guanacaste | Sector Pilla      | Sendero Carica      | 10.98284 | -85.42936 | 660 | Petrona Rios      |
| DHPAR0003625 | HIC1729-05 | 626 | DG348479 |          | 27-May-2005 | Belvisia Woodley04D | Pachygonidia drucei  | Sphingidae | 95-SRNP-31308   | Area de Conservacion Guanacaste | Sector Pilla      | Ingas               | 11.00311 | -85.42041 | 580 | Petrona Rios      |
| DHPAR0003635 | HIC1739-05 | 625 | DG348478 |          | 2-Jun-2005  | Belvisia Woodley04D | Pachygonidia drucei  | Sphingidae | 95-SRNP-31380   | Area de Conservacion Guanacaste | Sector Pilla      | Estacion Pilla      | 10.98931 | -85.42581 | 675 | Petrona Rios      |
| DHPAR0001155 | HIC1014-05 | 625 | DG348505 |          | 19-May-2001 | Belvisia Woodley05  | Rothschildia lebeau  | Saurimidae | 01-SRNP-12402   | Area de Conservacion Guanacaste | Sector Santa Rosa | Cortafuegos Naranjo | 10.8352  | -85.6248  | 285 | Daniel H. Janzen  |
| DHPAR0001156 | HIC1022-05 | 662 | DG348505 |          | 10-Jan-2001 | Belvisia Woodley05  | Rothschildia lebeau  | Saurimidae | 01-SRNP-12001   | Area de Conservacion Guanacaste | Sector Santa Rosa | Area Administrativa | 10.8376  | -85.6187  | 295 | Joel Diaz         |
| DHPAR0001157 | HIC1030-05 | 662 | DG348506 |          | 29-Aug-1997 | Belvisia Woodley05  | Rothschildia erycina | Saurimidae | 97-SRNP-4750    | Area de Conservacion Guanacaste | Sector El Hacha   | Sendero Tigre       | 11.0317  | -85.5282  | 280 | Mariano Pereira   |
| DHPAR0001158 | HIC1038-05 | 662 | DG348507 |          | 20-Apr-1997 | Belvisia Woodley05  | Rothschildia erycina | Saurimidae | 96-SRNP-7260.13 | Area de Conservacion Guanacaste | Sector Santa Rosa | Bosque San Emilio   | 10.8439  | -85.6138  | 300 | guianeros         |
| DHPAR0001149 | HIC1063-05 | 662 | DG348508 |          | 18-Aug-2004 | Belvisia Woodley05  | Rothschildia lebeau  | Saurimidae | 04-SRNP-22511   | Area de Conservacion Guanacaste | Del Oro           | Uncaria             | 11.0175  | -85.4744  | 370 | Lucia Rios        |
| DHPAR0001150 | HIC1071-05 | 662 | DG348509 |          | 01-Aug-2004 | Belvisia Woodley05  | Rothschildia lebeau  | Saurimidae | 04-SRNP-80004   | Area de Conservacion Guanacaste | Sector Santa Rosa | Area Administrativa | 10.8376  | -85.6187  | 295 | Sal Agosta        |
| DHPAR0001151 | HIC1079-05 | 662 | DG348509 |          | 11-Oct-2003 | Belvisia Woodley05  | Rothschildia lebeau  | Saurimidae | 03-SRNP-26541   | Area de Conservacion Guanacaste | Sector Santa Rosa | Cafetal             | 10.8583  | -85.6109  | 280 | Joel Diaz         |
| DHPAR0001152 | HIC1087-05 | 662 | DG348510 |          | 08-Aug-2003 | Belvisia Woodley05  | Rothschildia lebeau  | Saurimidae | 03-SRNP-25336   | Area de Conservacion Guanacaste | Sector Santa Rosa | Area Administrativa | 10.8376  | -85.6187  | 295 | Maria Garcia      |
| DHPAR0001153 | HIC1095-05 | 662 | DG348511 |          | 04-May-2003 | Belvisia Woodley05  | Rothschildia lebeau  | Saurimidae | 03-SRNP-12334   | Area de Conservacion Guanacaste | Sector Santa Rosa | Area Administrativa | 10.8376  | -85.6187  | 295 | Joel Diaz         |
| DHPAR0001154 | HIC1103-05 | 662 | DG348512 |          | 06-Aug-2002 | Belvisia Woodley05  | Rothschildia lebeau  | Saurimidae | 02-SRNP-13152   | Area de Conservacion Guanacaste | Sector Santa Rosa | Cafetal             | 10.8583  | -85.6109  | 280 | Felipe Chaverria  |
| DHPAR0003578 | HIC1682-05 | 623 | DG348504 |          |             | Belvisia Woodley05  | Rothschildia lebeau  | Saurimidae | 05-SRNP-17039   | Area de Conservacion Guanacaste | Sector Santa Rosa | Area Administrativa | 10.83764 | -85.61871 | 295 | Sal Agosta        |
| DHPAR0001167 | HIC1013-05 | 567 | DG348513 |          | 25-Aug-1989 | Belvisia Woodley06  | Manduca rustica      | Sphingidae | 89-SRNP-566     | Area de Conservacion Guanacaste | Sector Santa Rosa | Bosque San Emilio   | 10.8439  | -85.6138  | 300 | guianeros         |
| DHPAR0001168 | HIC1021-05 | 662 | DG348514 |          | 28-Apr-1989 | Belvisia Woodley06  | Manduca dilucida     | Sphingidae | 88-SRNP-174     | Area de Conservacion Guanacaste | Sector Santa Rosa | Cafetal             | 10.8583  | -85.6109  | 280 | guianeros         |
| DHPAR0001169 | HIC1046-05 | 662 | DG348514 |          | 20-Oct-2004 | Belvisia Woodley06  | Manduca occulta      | Sphingidae | 04-SRNP-48518   | Area de Conservacion Guanacaste | Sector Cacao      | Quebrada Orillo     | 10.89    | -85.4797  | 550 | Mariano Pereira   |
| DHPAR0001150 | HIC1054-05 | 662 | DG348514 |          | 25-Sep-1996 | Belvisia Woodley06  | Manduca muscosa      | Sphingidae | 96-SRNP-8809    | Area de Conservacion Guanacaste | Sector Santa Rosa | Area Administrativa | 10.8376  | -85.6187  | 295 | guianeros         |
| DHPAR0001161 | HIC1062-05 | 579 | DG348515 |          | 05-Aug-1995 | Belvisia Woodley06  | Manduca Janzen03     | Sphingidae | 95-SRNP-4739    | La Esperanza                    | La Esperanza      | Finca Juan Acosta   |          |           | 500 | Juan Acosta       |
| DHPAR0001162 | HIC1070-05 | 579 | DG348516 |          | 31-Aug-1995 | Belvisia Woodley06  | Manduca Janzen03     | Sphingidae | 95-SRNP-6845    | Area de Conservacion Guanacaste | Sector Horizontes | Sitio La Dama       | 10.7863  | -85.5583  | 105 | guianeros         |
| DHPAR0001163 | HIC1078-05 | 575 | DG348517 |          | 28-Feb-1993 | Belvisia Woodley06  | Manduca dilucida     | Sphingidae | 92-SRNP-2371    | Area de Conservacion Guanacaste | Sector Santa Rosa | Cafetal             | 10.8583  | -85.6109  | 280 | guianeros         |
| DHPAR0001164 | HIC1086-05 | 554 | DG348518 |          | 13-Jul-1993 | Belvisia Woodley06  | Manduca dilucida     | Sphingidae | 93-SRNP-1144.2  | Area de Conservacion Guanacaste | Sector Santa Rosa | Cafetal             | 10.8583  | -85.6109  | 280 | guianeros         |
| DHPAR0001165 | HIC1094-05 | 374 | DG348519 |          | 12-Jul-1993 | Belvisia Woodley06  | Manduca dilucida     | Sphingidae | 93-SRNP-992     | Area de Conservacion Guanacaste | Sector Santa Rosa | Bosque San Emilio   | 10.8439  | -85.6138  | 300 | guianeros         |
| DHPAR0001166 | HIC1102-05 | 580 | DG348520 |          | 11-Sep-1993 | Belvisia Woodley06  | Manduca dilucida     | Sphingidae | 93-SRNP-781     | Area de Conservacion Guanacaste | Sector Santa Rosa | Bosque San Emilio   | 10.8439  | -85.6138  | 300 | guianeros         |
| DHPAR0001671 | HIC1387-05 | 656 | DG348521 |          | 14-Aug-2000 | Belvisia Woodley06  | Coccyzus antaeus     | Sphingidae | 00-SRNP-15988   | Area de Conservacion Guanacaste | Sector Santa Rosa | Cerro Piedra        | 10.831   | -85.618   | 285 | Daniel H. Janzen  |
| DHPAR0001672 | HIC1389-05 | 324 | DG348522 |          | 29-May-1998 | Belvisia Woodley06  | Perithous florestan  | Saurimidae | 97-SRNP-149     | Area de Conservacion Guanacaste | Sector Santa Rosa | Cerro Piedra        | 10.83095 | -85.61778 | 285 | guianeros         |
| DHPAR0001673 | HIC1389-05 | 356 | DG348523 |          | 5-Aug-1987  | Belvisia Woodley06  | Manduca florestan    | Sphingidae | 97-SRNP-483     | Area de Conservacion Guanacaste | Sector Santa Rosa | Cafetal             | 10.85827 | -85.61089 | 380 | guianeros         |
| DHPAR0001674 | HIC1390-05 | 658 | DG348524 |          | 9-Aug-1984  | Belvisia Woodley06  | Coccyzus duponchel   | Sphingidae | 84-SRNP-1642    | Area de Conservacion Guanacaste | Sector Santa Rosa | Bosque Humedo       | 10.85145 | -85.60801 | 290 | Daniel H. Janzen  |
| DHPAR0001875 | HIC1391-05 | 658 | DG348525 |          | 18-Jul-1984 | Belvisia Woodley06  | Haliopsis ladus      | Sphingidae | 84-SRNP-272.222 | Area de Conservacion Guanacaste | Sector Santa Rosa | Tanquetas           | 10.87078 | -85.60635 | 295 | Daniel H. Janzen  |
| DHPAR0001876 | HIC1392-05 | 655 | DG348526 |          | 16-Aug-1982 | Belvisia Woodley06  | Manduca rustica      | Sphingidae | 82-SRNP-530     | Area de Conservacion Guanacaste | Sector Santa Rosa | Area Administrativa | 10.83764 | -85.61871 | 295 | Daniel H. Janzen  |
| DHPAR0001877 | HIC1393-05 | 658 | DG348527 |          | 11-Aug-1981 | Belvisia Woodley06  | Manduca muscosa      | Sphingidae | 81-SRNP-686     | Area de Conservacion Guanacaste | Sector Santa Rosa | Bosque Humedo       | 10.85145 | -85.60801 | 290 | Daniel H. Janzen  |
| DHPAR0001878 | HIC1394-05 | 658 | DG348528 |          | 30-Jul-1981 | Belvisia Woodley06  | Manduca muscosa      | Sphingidae | 81-SRNP-493     | Area de Conservacion Guanacaste | Sector Santa Rosa | Area Administrativa | 10.83764 | -85.61871 | 295 | Daniel H. Janzen  |
| DHPAR0001879 | HIC1395-05 | 658 | DG348529 |          | 21-Jul-1981 | Belvisia Woodley06  | Manduca muscosa      | Sphingidae | 81-SRNP-400     | Area de Conservacion Guanacaste | Sector Santa Rosa | Area Administrativa | 10.83764 | -85.61871 | 295 | Daniel H. Janzen  |
| DHPAR0001880 | HIC1396-05 | 658 | DG348530 |          | 22-Jul-1980 | Belvisia Woodley06  | Sphinx erops         | Sphingidae | 80-SRNP-226     | Area de Conservacion Guanacaste | Sector Santa Rosa | Area Administrativa | 10.83764 | -85.61871 | 295 | Daniel H. Janzen  |
| DHPAR0001881 | HIC1397-05 | 658 | DG348531 |          | 3-Aug-1980  | Belvisia Woodley06  | Manduca muscosa      | Sphingidae | 80-SRNP-211     | Area de Conservacion Guanacaste | Sector Santa Rosa | Casona Santa Rosa   | 10.83381 | -85.61271 | 295 | Daniel H. Janzen  |
| DHPAR0001882 | HIC1398-05 | 625 | DG348531 |          | 10-Aug-1979 | Belvisia Woodley06  | Manduca muscosa      | Sphingidae | 79-SRNP-117     | Area de Conservacion Guanacaste | Sector Santa Rosa | Casona Santa Rosa   | 10.83381 | -85.61271 | 295 | Daniel H. Janzen  |
| DHPAR0001883 | HIC1399-05 | 332 | DG348532 |          | 14-Jul-1988 | Belvisia Woodley06  | Manduca dilucida     | Sphingidae | 88-SRNP-80      | Area de Conservacion Guanacaste | Sector Santa Rosa | Sendero Natural     | 10.83575 | -85.61253 | 290 | guianeros         |
| DHPAR0001884 | HIC1400-05 | 585 | DG348533 |          | 24-May-1988 | Belvisia Woodley06  | Manduca dilucida     | Sphingidae | 87-SRNP-549     | Area de Conservacion Guanacaste | Sector Santa Rosa | Bosque San Emilio   | 10.84389 | -85.61384 | 300 | guianeros         |
| DHPAR0001885 | HIC1401-05 | 658 | DG348534 |          | 23-Jul-1987 | Belvisia Woodley06  | Manduca dilucida     | Sphingidae | 87-SRNP-521     | Area de Conservacion Guanacaste | Sector Santa Rosa | Cafetal             | 10.85827 | -85.61089 | 280 | guianeros         |
| DHPAR0001886 | HIC1402-05 | 325 | DG348535 |          | 10-May-1988 | Belvisia Woodley06  | Manduca dilucida     | Sphingidae | 87-SRNP-480     | Area de Conservacion Guanacaste | Sector            |                     |          |           |     |                   |

|               |             |     |          |  |             |                     |                        |            |                 |                                 |                      |                        |          |           |      |                   |
|---------------|-------------|-----|----------|--|-------------|---------------------|------------------------|------------|-----------------|---------------------------------|----------------------|------------------------|----------|-----------|------|-------------------|
| DHJPAR0001827 | HIC1343-05  | 623 | DG348545 |  | 07-Dec-1998 | Belvisia Woodley07A | Xylophanes maculifer   | Sphingidae | 99-SRNP-12446   | Area de Conservacion Guanacaste | Sector Santa Rosa    | Cerro Piedra           | 10.8308  | -85.6178  | 286  | guaneros          |
| DHJPAR0001951 | HIC1467-05  | 656 | DG348546 |  | 2-Jan-1999  | Belvisia Woodley07A | Xylophanes hanriemanni | Sphingidae | 99-SRNP-15666   | Area de Conservacion Guanacaste | Sector Cacao         | Sendero Arenaltes      | 10.92471 | -85.46738 | 1080 | Mariano Pereira   |
| DHJPAR0003643 | HIC1747-05  | 619 | DG348540 |  | 10-Jun-2005 | Belvisia Woodley07A | Xylophanes zurchei     | Sphingidae | 05-SRNP-31488   | Area de Conservacion Guanacaste | Sector Pillita       | Sendero Memos          | 10.98171 | -85.42785 | 740  | Calixto Moraga    |
| DHJPAR0001171 | HIC1045-05  | 662 | DG348550 |  | 12-Jul-2004 | Belvisia Woodley07B | Erinnyis alope         | Sphingidae | 04-SRNP-33264   | Area de Conservacion Guanacaste | Sector Pillita       | Pasmompa               | 11.0193  | -85.41    | 440  | Manuel Rios       |
| DHJPAR0001174 | HIC1069-05  | 662 | DG348551 |  | 25-Jul-2004 | Belvisia Woodley07B | Erinnyis ello          | Sphingidae | 04-SRNP-12140   | Area de Conservacion Guanacaste | Sector Pooosol       | Casa Garzal            | 10.8781  | -85.5835  | 245  | Ruth Franco       |
| DHJPAR0001175 | HIC1077-05  | 662 | DG348552 |  | 09-Nov-2003 | Belvisia Woodley07B | Eupyrhoglossum sagra   | Sphingidae | 03-SRNP-26229   | Area de Conservacion Guanacaste | Sector Santa Rosa    | Bosque Humedo          | 10.8514  | -85.608   | 290  | Guillermo Pereira |
| DHJPAR0001284 | HIC1194-05  | 662 | DG348553 |  | 24-Sep-2004 | Belvisia Woodley07B | Erinnyis alope         | Sphingidae | 01-SRNP-10413   | Area de Conservacion Guanacaste | Del Oro              | Meteorologico          | 11.002   | -85.4617  | 590  | Roster Moraga     |
| DHJPAR0001748 | HIC1266-05  | 658 | DG348554 |  | 22-Jul-2004 | Belvisia Woodley07B | Erinnyis ello          | Sphingidae | 04-SRNP-12143   | Area de Conservacion Guanacaste | Sector Pooosol       | Casa Garzal            | 10.8781  | -85.5835  | 245  | Ruth Franco       |
| DHJPAR0001749 | HIC1267-05  | 640 | DG348555 |  | 25-Jul-2004 | Belvisia Woodley07B | Erinnyis ello          | Sphingidae | 04-SRNP-12138   | Area de Conservacion Guanacaste | Sector Pooosol       | Casa Garzal            | 10.8781  | -85.5835  | 245  | Ruth Franco       |
| DHJPAR0001757 | HIC1275-05  | 543 | DG348556 |  | 08-Jul-2000 | Belvisia Woodley07B | Aellopos fadus         | Sphingidae | 00-SRNP-7849    | Area de Conservacion Guanacaste | Sector Santa Rosa    | Tanquetas              | 10.8708  | -85.6053  | 295  | guaneros          |
| DHJPAR0001762 | HIC1280-05  | 550 | DG348557 |  | 22-Dec-1999 | Belvisia Woodley07B | Erinnyis alope         | Sphingidae | 99-SRNP-15385   | Area de Conservacion Guanacaste | Sector El Hacha      | Estacion Los Almendros | 11.0285  | -85.5278  | 290  | Lucia Rios        |
| DHJPAR0001772 | HIC1290-05  | 547 | DG348558 |  | 07-May-1999 | Belvisia Woodley07B | Erinnyis ello          | Sphingidae | 99-SRNP-4604    | Area de Conservacion Guanacaste | Sector San Cristobal | Estacion San Cristobal | 10.871   | -85.3914  | 640  | Osvaldo Espinoza  |
| DHJPAR0001832 | HIC1348-05  | 635 | DG348559 |  | 28-Jul-1998 | Belvisia Woodley07B | Erinnyis crameri       | Sphingidae | 99-SRNP-8709    | Area de Conservacion Guanacaste | Sector Santa Rosa    | Bosque San Emilio      | 10.8439  | -85.6138  | 300  | Elieth Carrillano |
| DHJPAR0001835 | HIC1351-05  | 623 | DG348560 |  | 24-Jul-1998 | Belvisia Woodley07B | Aellopos fadus         | Sphingidae | 99-SRNP-8677    | Area de Conservacion Guanacaste | Sector Santa Rosa    | Cortaleguas Naranjo    | 10.8352  | -85.6248  | 285  | John J. Sullivan  |
| DHJPAR0001837 | HIC1353-05  | 625 | DG348561 |  | 30-Jul-1998 | Belvisia Woodley07B | Erinnyis ello          | Sphingidae | 99-SRNP-8335    | Area de Conservacion Guanacaste | Sector Santa Rosa    | Bosque Encino Guacimal | 10.8688  | -85.6023  | 285  | guaneros          |
| DHJPAR0001847 | HIC1363-05  | 624 | DG348562 |  | 02-Jun-1995 | Belvisia Woodley07B | Aellopos titan         | Sphingidae | 99-SRNP-3514    | Area de Conservacion Guanacaste | Sector Santa Rosa    | Sendero Natural        | 10.8357  | -85.6125  | 290  | guaneros          |
| DHJPAR0001848 | HIC1364-05  | 607 | DG348563 |  | 09-Jun-1995 | Belvisia Woodley07B | Erinnyis crameri       | Sphingidae | 99-SRNP-3138    | Area de Conservacion Guanacaste | Sector Santa Rosa    | Area Administrativa    | 10.8376  | -85.6187  | 295  | guaneros          |
| DHJPAR0001849 | HIC1365-05  | 634 | DG348564 |  | 08-Jun-1995 | Belvisia Woodley07B | Aellopos titan         | Sphingidae | 99-SRNP-3020    | Area de Conservacion Guanacaste | Sector Santa Rosa    | Area Administrativa    | 10.8376  | -85.6187  | 295  | guaneros          |
| DHJPAR0001860 | HIC1366-05  | 618 | DG348565 |  | 6-Jun-1995  | Belvisia Woodley07B | Erinnyis crameri       | Sphingidae | 99-SRNP-2814    | Area de Conservacion Guanacaste | Sector Santa Rosa    | Area Administrativa    | 10.8376  | -85.6187  | 295  | guaneros          |
| DHJPAR0001861 | HIC1367-05  | 624 | DG348566 |  | 5-Jun-1995  | Belvisia Woodley07B | Erinnyis crameri       | Sphingidae | 99-SRNP-2807    | Area de Conservacion Guanacaste | Sector Santa Rosa    | Area Administrativa    | 10.8376  | -85.6187  | 295  | guaneros          |
| DHJPAR0001869 | HIC1375-05  | 645 | DG348567 |  | 24-Jun-1993 | Belvisia Woodley07B | Aellopos titan         | Sphingidae | 99-SRNP-1278    | Area de Conservacion Guanacaste | Sector Santa Rosa    | Area Administrativa    | 10.8376  | -85.6187  | 295  | guaneros          |
| DHJPAR0001864 | HIC1380-05  | 630 | DG348568 |  | 23-Jul-1988 | Belvisia Woodley07B | Erinnyis ello          | Sphingidae | 99-SRNP-482     | Area de Conservacion Guanacaste | Sector Oro           | Estacion Maritza       | 10.9573  | -85.4961  | 570  | guaneros          |
| DHJPAR0001953 | HIC1469-05  | 656 | DG348569 |  | 2-Aug-1998  | Belvisia Woodley07B | Aellopos fadus         | Sphingidae | 99-SRNP-8839    | Area de Conservacion Guanacaste | Sector Santa Rosa    | Cafetal                | 10.8527  | -85.61089 | 280  | Ruth Franco       |
| DHJPAR0001961 | HIC1477-05  | 655 | DG348570 |  | 9-Jul-1998  | Belvisia Woodley07B | Erinnyis ello          | Sphingidae | 99-SRNP-8300    | Area de Conservacion Guanacaste | Sector Santa Rosa    | Bosque Encino Guacimal | 10.8687  | -85.60233 | 285  | guaneros          |
| DHJPAR0001963 | HIC1479-05  | 656 | DG348571 |  | 5-Jun-1995  | Belvisia Woodley07B | Aellopos titan         | Sphingidae | 99-SRNP-3029    | Area de Conservacion Guanacaste | Sector Santa Rosa    | Area Administrativa    | 10.83764 | -85.61871 | 295  | guaneros          |
| DHJPAR0001964 | HIC1480-05  | 590 | DG348572 |  | 6-Jun-1995  | Belvisia Woodley07B | Erinnyis crameri       | Sphingidae | 99-SRNP-2781    | Area de Conservacion Guanacaste | Sector Santa Rosa    | Area Administrativa    | 10.83764 | -85.61871 | 295  | guaneros          |
| DHJPAR0001970 | HIC1486-05  | 581 | DG348573 |  | 2-Jul-1992  | Belvisia Woodley07B | Aellopos titan         | Sphingidae | 92-SRNP-1170    | Area de Conservacion Guanacaste | Sector Santa Rosa    | Bosque San Emilio      | 10.8439  | -85.61384 | 300  | guaneros          |
| DHJPAR0001971 | HIC1487-05  | 580 | DG348574 |  | 23-Jul-1988 | Belvisia Woodley07B | Aellopos fadus         | Sphingidae | 88-SRNP-483     | Area de Conservacion Guanacaste | Sector Oro           | Estacion Maritza       | 10.95727 | -85.49514 | 570  | guaneros          |
| DHJPAR0001975 | HIC1491-05  | 332 | DG348575 |  | 4-Jul-1985  | Belvisia Woodley07B | Erinnyis oenotrus      | Sphingidae | 85-SRNP-2208    | Area de Conservacion Guanacaste | Sector Santa Rosa    | Area Administrativa    | 10.83764 | -85.61871 | 295  | guaneros          |
| DHJPAR0001978 | HIC1494-05  | 580 | DG348576 |  | 20-Jul-1984 | Belvisia Woodley07B | Erinnyis alope         | Sphingidae | 84-SRNP-794     | Area de Conservacion Guanacaste | Sector Santa Rosa    | Bosque Humedo          | 10.85145 | -85.60801 | 290  | Daniel H. Janzen  |
| DHJPAR0001984 | HIC1500-05  | 583 | DG348577 |  | 9-Jul-1994  | Belvisia Woodley07B | Aellopos fadus         | Sphingidae | 84-SRNP-3262    | Area de Conservacion Guanacaste | Sector Santa Rosa    | Tanquetas              | 10.87078 | -85.60535 | 295  | guaneros          |
| DHJPAR0001985 | HIC1501-05  | 580 | DG348578 |  | 2-Jul-1994  | Belvisia Woodley07B | Aellopos fadus         | Sphingidae | 84-SRNP-3273    | Area de Conservacion Guanacaste | Sector Santa Rosa    | Tanquetas              | 10.87078 | -85.60535 | 295  | guaneros          |
| DHJPAR0001986 | HIC1502-05  | 582 | DG348579 |  | 12-Jul-1984 | Belvisia Woodley07B | Aellopos fadus         | Sphingidae | 84-SRNP-272.177 | Area de Conservacion Guanacaste | Sector Santa Rosa    | Tanquetas              | 10.87078 | -85.60535 | 295  | Daniel H. Janzen  |
| DHJPAR0001989 | HIC1505-05  | 662 | DG348580 |  | 4-Jul-1984  | Belvisia Woodley07B | Aellopos fadus         | Sphingidae | 84-SRNP-272.134 | Area de Conservacion Guanacaste | Sector Santa Rosa    | Tanquetas              | 10.87078 | -85.60535 | 295  | Daniel H. Janzen  |
| DHJPAR0001991 | HIC1507-05  | 316 | DG348581 |  | 4-Jul-1984  | Belvisia Woodley07B | Aellopos fadus         | Sphingidae | 84-SRNP-272.116 | Area de Conservacion Guanacaste | Sector Santa Rosa    | Tanquetas              | 10.87078 | -85.60535 | 295  | Daniel H. Janzen  |
| DHJPAR0001994 | HIC1510-05  | 280 | DG348582 |  | 10-Jul-1984 | Belvisia Woodley07B | Aellopos fadus         | Sphingidae | 84-SRNP-272.048 | Area de Conservacion Guanacaste | Sector Santa Rosa    | Tanquetas              | 10.87078 | -85.60535 | 295  | Daniel H. Janzen  |
| DHJPAR0003638 | HIC1742-05  | 625 | DG348549 |  | 1-Jul-2005  | Belvisia Woodley07B | Aellopos titan         | Sphingidae | 05-SRNP-15876   | Area de Conservacion Guanacaste | Sector Santa Rosa    | Cerro Piedra           | 10.83085 | -85.61778 | 285  | Catherine Hulthof |
| DHJPAR0003640 | HIC1744-05  | 419 | DG348548 |  | 24-Jul-2005 | Belvisia Woodley07B | Erinnyis ello          | Sphingidae | 05-SRNP-18131   | Area de Conservacion Guanacaste | Sector Santa Rosa    | Bosque Humedo          | 10.85145 | -85.60801 | 290  | Freddy Quesada    |
| DHJPAR0003641 | HIC1745-05  | 625 | DG348547 |  | 23-Jul-2005 | Belvisia Woodley07B | Erinnyis ello          | Sphingidae | 05-SRNP-18183   | Area de Conservacion Guanacaste | Sector Santa Rosa    | Bosque Humedo          | 10.85145 | -85.60801 | 290  | Freddy Quesada    |
| DHJPAR0001169 | HIC1029-05  | 563 | DG348584 |  | 12-Oct-2004 | Belvisia Woodley07C | Pachylia sycos         | Sphingidae | 04-SRNP-14443   | Area de Conservacion Guanacaste | Sector Santa Rosa    | Area Administrativa    | 10.8376  | -85.6187  | 295  | Ruth Franco       |
| DHJPAR0001173 | HIC1011-05  | 517 | DG348585 |  | 15-Aug-2003 | Belvisia Woodley07C | Pachylia sycos         | Sphingidae | 03-SRNP-14258   | Area de Conservacion Guanacaste | Sector Santa Rosa    | Area Administrativa    | 10.8376  | -85.6187  | 295  | Xavier Basurto    |
| DHJPAR0001286 | HIC1113-05  | 634 | DG348586 |  | 01-Dec-2000 | Belvisia Woodley07C | Xylophanes chiron      | Sphingidae | 00-SRNP-20686   | Area de Conservacion Guanacaste | Rincon Rainforest    | Sendero Perys          | 10.8993  | -85.2749  | 420  | Freyd Vargas      |
| DHJPAR0001283 | HIC186-2001 | 662 | DG348587 |  | 05-Sep-2001 | Belvisia Woodley07C | Xylophanes chiron      | Sphingidae | 01-SRNP-16405   | Area de Conservacion Guanacaste | Sector Santa Rosa    | Area Administrativa    | 10.8376  | -85.6187  | 295  | Roger Blanco      |
| DHJPAR0001750 | HIC1268-05  | 627 | DG348588 |  | 19-Aug-2003 | Belvisia Woodley07C | Pachylia sycos         | Sphingidae | 03-SRNP-14257   | Area de Conservacion Guanacaste | Sector Santa Rosa    | Area Administrativa    | 10.8376  | -85.6187  | 295  | Ruth Franco       |
| DHJPAR0001784 | HIC1282-05  | 547 | DG348589 |  | 04-Jul-1999 | Belvisia Woodley07C | Pachylia ficus         | Sphingidae | 99-SRNP-8697    | Area de Conservacion Guanacaste | Sector Santa Rosa    | Area Administrativa    | 10.8376  | -85.6187  | 295  | guaneros          |
| DHJPAR0001765 | HIC1283-05  | 580 | DG348590 |  | 30-Jun-1999 | Belvisia Woodley07C | Pachylia sycos         | Sphingidae | 99-SRNP-8696    | Area de Conservacion Guanacaste | Sector Santa Rosa    | Area Administrativa    | 10.8376  | -85.6187  | 295  | guaneros          |
| DHJPAR0001786 | HIC1284-05  | 658 | DG348591 |  | 21-Jun-1999 | Belvisia Woodley07C | Pachylia ficus         | Sphingidae | 99-SRNP-7456    | Area de Conservacion Guanacaste | Sector Santa Rosa    | Vado Niuperal          | 10.8021  | -85.6537  | 10   | Guillermo Pereira |
| DHJPAR0001828 | HIC1344-05  | 613 | DG348592 |  | 13-Nov-1998 | Belvisia Woodley07C | Pachylia ficus         | Sphingidae | 99-SRNP-12314   | Area de Conservacion Guanacaste | Sector Santa Rosa    | Area Administrativa    | 10.8376  | -85.6187  | 295  | Manuel Pereira    |
| DHJPAR0001830 | HIC1346-05  | 634 | DG348593 |  | 05-Aug-1998 | Belvisia Woodley07C | Pachylia sycos         | Sphingidae | 99-SRNP-10210   | Area de Conservacion Guanacaste | Sector Santa Rosa    | Area Administrativa    | 10.8376  | -85.6187  | 295  | Eric Olson        |
| DHJPAR0001842 | HIC1358-05  | 418 | DG348594 |  | 02-Aug-1997 | Belvisia Woodley07C | Pachylia ficus         | Sphingidae | 97-SRNP-3139    | Area de Conservacion Guanacaste | Sector Santa Rosa    | Area Administrativa    | 10.8376  | -85.6187  | 295  | Daniel H. Janzen  |
| DHJPAR0001844 | HIC1360-05  | 418 | DG348595 |  | 16-Jul-1997 | Belvisia Woodley07C | Pachylia ficus         | Sphingidae | 97-SRNP-2391    | Area de Conservacion Guanacaste | Sector Oro           | Quebrada Las Yeguitas  | 10.9616  | -85.4958  | 560  | guaneros          |
| DHJPAR0001845 | HIC1361-05  | 418 | DG348596 |  | 15-Aug-1995 | Belvisia Woodley07C | Pachylia sycos         | Sphingidae | 95-SRNP-8636    | Area de Conservacion Guanacaste | Sector Santa Rosa    | Area Administrativa    | 10.8376  | -85.6187  | 295  | guaneros          |
| DHJPAR0001856 | HIC1372-05  | 418 | DG348597 |  | 07-Aug-1993 | Belvisia Woodley07C | Pachylia sycos         | Sphingidae | 93-SRNP-3735    | Area de Conservacion Guanacaste | Sector Santa Rosa    | Casona Santa Rosa      | 10.8338  | -85.6127  | 295  | guaneros          |
| DHJPAR0001863 | HIC1379-05  | 634 | DG348598 |  | 14-Dec-1990 | Belvisia Woodley07C | Pachylia sycos         | Sphingidae | 90-SRNP-2128    | Area de Conservacion Guanacaste | Sector Santa Rosa    | Casona Santa Rosa      | 10.8338  | -85.6127  | 295  | guaneros          |
| DHJPAR0001865 | HIC1385-05  | 418 | DG348599 |  | 10-Jul-1984 | Belvisia Woodley07C | Pachylia ficus         | Sphingidae | 84-SRNP-880     | Area de Conservacion Guanacaste | Sector Santa Rosa    | Bosque Humedo          | 10.8514  | -85.608   | 290  | Daniel H. Janzen  |
| DHJPAR0002000 | HIC1516-05  | 326 | DG348600 |  | 10-Jul-1978 | Belvisia Woodley07C | Pachylia ficus         | Sphingidae | 78-SRNP-55      | Area de Conservacion Guanacaste | Sector Santa Rosa    | Bosque Humedo          | 10.85145 | -85.60801 | 290  | Daniel H. Janzen  |
| DHJPAR0003587 | HIC1891-05  | 626 | DG348593 |  | 17-Sep-2005 | Belvisia Woodley07D | Pachylia sycos         | Sphingidae | 95-SRNP-60213   | Area de Conservacion Guanacaste | Sector Santa Rosa    | Casona Santa Rosa      | 10.83381 | -85.61271 | 295  | Daniel H. Janzen  |
| DHJPAR0001170 | HIC1037-05  | 662 | DG348603 |  | 06-Oct-2004 | Belvisia Woodley07D | Xylophanes chiron      | Sphingidae | 04-SRNP-34588   | Area de Conservacion Guanacaste | Sector Pillita       | Sendero Cuestana       | 10.9945  | -85.4146  | 640  | Calixto Moraga    |
| DHJPAR0001173 | HIC1061-05  | 612 | DG348604 |  | 09-Jul-2004 | Belvisia Woodley07D | Xylophanes chiron      | Sphingidae | 04-SRNP-22456   | Area de Conservacion Guanacaste | Del Oro              | Sendero Puertas        | 11.0109  | -85.4882  | 400  | Lucia Rios        |
| DHJPAR0001177 | HIC1093-05  | 662 | DG348605 |  | 02-Sep-2003 | Belvisia Woodley07D | Xylophanes chiron      | Sphingidae | 03-SRNP-11998   | Area de Conservacion Guanacaste | Rincon Rainforest    | San Lucas              | 10.9185  | -85.3034  | 320  | Jose Perez        |
| DHJPAR0001746 | HIC1264-05  | 658 | DG348606 |  | 13-Oct-2004 | Belvisia Woodley07D | Xylophanes chiron      | Sphingidae | 04-SRNP-34587   | Area de Conservacion Guanacaste | Sector Pillita       | Sendero Cuestana       | 10.9945  | -85.4146  | 640  | Calixto Moraga    |
| DHJPAR0001773 | HIC1291-05  | 615 | DG348607 |  | 19-Dec-1998 | Belvisia Woodley07D | Cautethia yucatanana   | Sphingidae | 88-SRNP-12754   | Area de Conservacion Guanacaste | Sector Murcielago    | Estacion Murcielago    | 10.9009  | -85.729   | 40   | Guillermo Pereira |
| DHJPAR0001829 | HIC1345-05  | 623 | DG348608 |  | 05-Nov-1998 | Belvisia Woodley07D | Callinoma falcofer     | Sphingidae | 88-SRNP-3607    | Area de Conservacion Guanacaste | Sector Cacao         | Estacion Gongora       | 10.887   | -85.4744  | 570  | Mariano Pereira   |
| DHJPAR0001834 | HIC1350-05  | 418 | DG348609 |  | 04-Aug-1998 | Belvisia Woodley07D | Callinoma falcofer     | Sphingidae | 88-SRNP-8683    | Area de Conservacion Guanacaste | Sector Santa Rosa    | Quebrada Costa Rica    | 10.8274  | -85.6365  | 275  | Manuel Pereira    |
| DHJPAR0001841 | HIC1357-05  | 622 | DG348610 |  | 19-Jul-1998 | Belvisia Woodley07D | Aellopos fadus         | Sphingidae | 88-SRNP-1836    | Area de Conservacion Guanacaste | Sector Santa Rosa    | Cafetal                | 10.8583  | -85.6109  | 280  | Guillermo Pereira |
| DHJPAR0001846 | HIC1362-05  | 418 | DG348611 |  | 08-Aug-1995 | Belvisia Woodley07D | Cautethia yucatanana   | Sphingidae | 95-SRNP-6193    | Area de Conservacion Guanacaste | Sector Murcielago    | Estacion Murcielago    | 10.9009  | -85.729   | 40   | guaneros          |
| DHJPAR0001854 | HIC1370-05  | 618 | DG348612 |  | 08-Dec-     |                     |                        |            |                 |                                 |                      |                        |          |           |      |                   |

|               |              |     |          |  |             |                     |                       |             |                 |                                 |                      |                     |          |           |      |                   |
|---------------|--------------|-----|----------|--|-------------|---------------------|-----------------------|-------------|-----------------|---------------------------------|----------------------|---------------------|----------|-----------|------|-------------------|
| DHJPAR0001838 | HIC1354-05   | 624 | DG348624 |  | 20-Jul-1998 | Belvosia Woodley07E | Aellopus fadus        | Sphingidae  | 98-SRNP-8093    | Area de Conservacion Guanacaste | Sector Santa Rosa    | Quebrada Costa Rica | 10.8274  | -85.6365  | 275  | Guillermo Pereira |
| DHJPAR0001838 | HIC1374-05   | 418 | DG348625 |  | 31-Jul-1993 | Belvosia Woodley07E | Erinnyis ocnortus     | Sphingidae  | 93-SRNP-2467    | Area de Conservacion Guanacaste | Sector Santa Rosa    | Bosque Humedo       | 10.8514  | -85.608   | 290  | guaneros          |
| DHJPAR0001860 | HIC1376-05   | 623 | DG348626 |  | 25-Jul-1992 | Belvosia Woodley07E | Aellopus fadus        | Sphingidae  | 92-SRNP-2281    | Area de Conservacion Guanacaste | Sector Santa Rosa    | Alcarran            | 10.8925  | -85.6034  | 260  | guaneros          |
| DHJPAR0001860 | HIC1381-05   | 624 | DG348627 |  | 18-Jul-1988 | Belvosia Woodley07E | Aellopus fadus        | Sphingidae  | 88-SRNP-393     | Area de Conservacion Guanacaste | Sector Santa Rosa    | Bosque Humedo       | 10.8514  | -85.608   | 290  | guaneros          |
| DHJPAR0001866 | HIC1382-05   | 418 | DG348628 |  | 14-Jul-1987 | Belvosia Woodley07E | Aellopus fadus        | Sphingidae  | 87-SRNP-193     | Area de Conservacion Guanacaste | Sector Santa Rosa    | Lucas               | 10.8536  | -85.6094  | 300  | guaneros          |
| DHJPAR0001866 | HIC1383-05   | 610 | DG348629 |  | 11-Jul-1985 | Belvosia Woodley07E | Erinnyis ocnortus     | Sphingidae  | 85-SRNP-257     | Area de Conservacion Guanacaste | Sector Santa Rosa    | Bosque San Emilio   | 10.8439  | -85.6138  | 300  | guaneros          |
| DHJPAR0001868 | HIC1384-05   | 418 | DG348630 |  | 11-Jul-1984 | Belvosia Woodley07E | Erinnyis ocnortus     | Sphingidae  | 84-SRNP-1461    | Area de Conservacion Guanacaste | Sector Santa Rosa    | Bosque San Emilio   | 10.8439  | -85.6138  | 300  | Daniel H. Janzen  |
| DHJPAR0001868 | HIC1484-05   | 583 | DG348631 |  | 21-Jul-1992 | Belvosia Woodley07E | Aellopus fadus        | Sphingidae  | 92-SRNP-2229    | Area de Conservacion Guanacaste | Sector Santa Rosa    | Tanquetas           | 10.87078 | -85.6035  | 295  | guaneros          |
| DHJPAR0001969 | HIC1485-05   | 583 | DG348632 |  | 4-Jul-1992  | Belvosia Woodley07E | Aellopus fadus        | Sphingidae  | 92-SRNP-1430    | Area de Conservacion Guanacaste | Sector Santa Rosa    | Las Mesas           | 10.84653 | -85.60915 | 305  | guaneros          |
| DHJPAR0001973 | HIC1489-05   | 614 | DG348633 |  | 10-Jul-1987 | Belvosia Woodley07E | Aellopus fadus        | Sphingidae  | 87-SRNP-170     | Area de Conservacion Guanacaste | Sector Santa Rosa    | Lucas               | 10.85362 | -85.60942 | 300  | guaneros          |
| DHJPAR0001974 | HIC1490-05   | 563 | DG348634 |  | 24-Jun-1985 | Belvosia Woodley07E | Aellopus fadus        | Sphingidae  | 85-SRNP-223.21  | Area de Conservacion Guanacaste | Sector Santa Rosa    | Tanquetas           | 10.87078 | -85.6035  | 295  | guaneros          |
| DHJPAR0001974 | HIC1492-05   | 327 | DG348635 |  | 11-Jul-1984 | Belvosia Woodley07E | Aellopus fadus        | Sphingidae  | 84-SRNP-1460    | Area de Conservacion Guanacaste | Sector Santa Rosa    | Cafetal             | 10.85827 | -85.61089 | 280  | Daniel H. Janzen  |
| DHJPAR0001977 | HIC1493-05   | 582 | DG348636 |  | 24-Jun-1984 | Belvosia Woodley07E | Aellopus fadus        | Sphingidae  | 84-SRNP-860     | Area de Conservacion Guanacaste | Sector Santa Rosa    | Bosque Humedo       | 10.85145 | -85.60801 | 290  | Daniel H. Janzen  |
| DHJPAR0001979 | HIC1495-05   | 621 | DG348637 |  | 17-Jul-1984 | Belvosia Woodley07E | Aellopus fadus        | Sphingidae  | 84-SRNP-4568    | Area de Conservacion Guanacaste | Sector Santa Rosa    | Bosque Humedo       | 10.85145 | -85.60801 | 290  | Daniel H. Janzen  |
| DHJPAR0001981 | HIC1496-05   | 280 | DG348638 |  | 4-Jul-1984  | Belvosia Woodley07E | Aellopus fadus        | Sphingidae  | 84-SRNP-350C    | Area de Conservacion Guanacaste | Sector Santa Rosa    | Bosque San Emilio   | 10.84389 | -85.61384 | 300  | Daniel H. Janzen  |
| DHJPAR0001981 | HIC1497-05   | 524 | DG348639 |  | 9-Jul-1984  | Belvosia Woodley07E | Erinnyis ocnortus     | Sphingidae  | 84-SRNP-274     | Area de Conservacion Guanacaste | Sector Santa Rosa    | Bosque San Emilio   | 10.84389 | -85.61384 | 300  | Daniel H. Janzen  |
| DHJPAR0001982 | HIC1498-05   | 614 | DG348640 |  | 19-Jul-1984 | Belvosia Woodley07E | Aellopus fadus        | Sphingidae  | 84-SRNP-272.191 | Area de Conservacion Guanacaste | Sector Santa Rosa    | Tanquetas           | 10.87078 | -85.6035  | 295  | Daniel H. Janzen  |
| DHJPAR0001983 | HIC1499-05   | 583 | DG348641 |  | 15-Jul-1984 | Belvosia Woodley07E | Aellopus fadus        | Sphingidae  | 84-SRNP-272.188 | Area de Conservacion Guanacaste | Sector Santa Rosa    | Tanquetas           | 10.87078 | -85.6035  | 295  | Daniel H. Janzen  |
| DHJPAR0001987 | HIC1503-05   | 582 | DG348642 |  | 15-Jul-1984 | Belvosia Woodley07E | Aellopus fadus        | Sphingidae  | 84-SRNP-272.184 | Area de Conservacion Guanacaste | Sector Santa Rosa    | Tanquetas           | 10.87078 | -85.6035  | 295  | Daniel H. Janzen  |
| DHJPAR0001988 | HIC1504-05   | 282 | DG348643 |  | 18-Jul-1984 | Belvosia Woodley07E | Aellopus fadus        | Sphingidae  | 84-SRNP-272.182 | Area de Conservacion Guanacaste | Sector Santa Rosa    | Tanquetas           | 10.87078 | -85.6035  | 295  | Daniel H. Janzen  |
| DHJPAR0001990 | HIC1506-05   | 383 | DG348644 |  | 15-Jul-1984 | Belvosia Woodley07E | Aellopus fadus        | Sphingidae  | 84-SRNP-272.117 | Area de Conservacion Guanacaste | Sector Santa Rosa    | Tanquetas           | 10.87078 | -85.6035  | 295  | Daniel H. Janzen  |
| DHJPAR0001992 | HIC1508-05   | 288 | DG348645 |  | 7-Jul-1984  | Belvosia Woodley07E | Aellopus fadus        | Sphingidae  | 84-SRNP-272.093 | Area de Conservacion Guanacaste | Sector Santa Rosa    | Tanquetas           | 10.87078 | -85.6035  | 295  | Daniel H. Janzen  |
| DHJPAR0001993 | HIC1509-05   | 563 | DG348646 |  | 9-Jul-1984  | Belvosia Woodley07E | Aellopus fadus        | Sphingidae  | 84-SRNP-272.064 | Area de Conservacion Guanacaste | Sector Santa Rosa    | Tanquetas           | 10.87078 | -85.6035  | 295  | Daniel H. Janzen  |
| DHJPAR0001995 | HIC1511-05   | 282 | DG348647 |  | 12-Jul-1984 | Belvosia Woodley07E | Aellopus fadus        | Sphingidae  | 84-SRNP-272.043 | Area de Conservacion Guanacaste | Sector Santa Rosa    | Tanquetas           | 10.87078 | -85.6035  | 295  | Daniel H. Janzen  |
| DHJPAR0001996 | HIC1512-05   | 273 | DG348648 |  | 7-Jul-1984  | Belvosia Woodley07E | Aellopus fadus        | Sphingidae  | 84-SRNP-272.040 | Area de Conservacion Guanacaste | Sector Santa Rosa    | Tanquetas           | 10.87078 | -85.6035  | 295  | Daniel H. Janzen  |
| DHJPAR0001997 | HIC1513-05   | 583 | DG348649 |  | 5-Jul-1984  | Belvosia Woodley07E | Erinnyis ocnortus     | Sphingidae  | 84-SRNP-2298    | Area de Conservacion Guanacaste | Sector Santa Rosa    | Bosque San Emilio   | 10.84389 | -85.61384 | 300  | Daniel H. Janzen  |
| DHJPAR0001998 | HIC1514-05   | 614 | DG348650 |  | 9-Jul-1984  | Belvosia Woodley07E | Erinnyis ocnortus     | Sphingidae  | 84-SRNP-229A    | Area de Conservacion Guanacaste | Sector Santa Rosa    | Bosque San Emilio   | 10.84389 | -85.61384 | 300  | Daniel H. Janzen  |
| DHJPAR0001288 | HIC129-05    | 662 | DG348652 |  | 25-Apr-2000 | Belvosia Woodley07F | Xylophanes tersa      | Sphingidae  | 00-SRNP-9157    | Area de Conservacion Guanacaste | Sector Cacao         | Estacion Cacao      | 10.9269  | -85.4682  | 1150 | Harry Ramirez     |
| DHJPAR0001753 | HIC1271-05   | 625 | DG348653 |  | 26-Apr-2000 | Belvosia Woodley07F | Xylophanes tersa      | Sphingidae  | 00-SRNP-9156    | Area de Conservacion Guanacaste | Sector Cacao         | Estacion Cacao      | 10.9269  | -85.4682  | 1150 | Harry Ramirez     |
| DHJPAR0001759 | HIC1277-05   | 544 | DG348654 |  | 08-Jul-2000 | Belvosia Woodley07F | Xylophanes tersa      | Sphingidae  | 00-SRNP-7445    | Area de Conservacion Guanacaste | Sector Santa Rosa    | Estero Naranjo      | 10.8043  | -85.6829  | 2    | guaneros          |
| DHJPAR0001760 | HIC1278-05   | 592 | DG348655 |  | 11-Apr-2000 | Belvosia Woodley07F | Xylophanes tersa      | Sphingidae  | 00-SRNP-6373    | Area de Conservacion Guanacaste | Potenillas           | Rio Azufredo        | 10.8122  | -85.5444  | 85   | Manuel Perera     |
| DHJPAR0001762 | HIC1276-05   | 623 | DG348651 |  | 18-May-2005 | Belvosia Woodley07F | Xylophanes tersa      | Sphingidae  | 05-SRNP-31107   | Area de Conservacion Guanacaste | Sector Pitilla       | Pasmompa            | 11.01926 | -85.40997 | 440  | Manuel Rios       |
| DHJPAR0001942 | HIC1033-05   | 618 | DG348657 |  | 17-Jun-2004 | Belvosia Woodley07G | Xylophanes pluto      | Sphingidae  | 04-SRNP-45507   | Area de Conservacion Guanacaste | Sector Cacao         | Quebrada Heliconia  | 10.8858  | -85.4922  | 390  | Dunia Garcia      |
| DHJPAR0001287 | HIC121-05    | 662 | DG348658 |  | 28-Jan-2001 | Belvosia Woodley07G | Xylophanes gutanensis | Sphingidae  | 00-SRNP-4550    | Area de Conservacion Guanacaste | Sector Pitilla       | Pasmompa            | 11.0193  | -85.41    | 440  | Roster Moraga     |
| DHJPAR0001289 | HIC137-05    | 612 | DG348659 |  | 31-Oct-2000 | Belvosia Woodley07G | Xylophanes chiron     | Sphingidae  | 00-SRNP-18460   | Area de Conservacion Guanacaste | Sector Santa Rosa    | Sendero Carbonal    | 10.7759  | -85.658   | 7    | guaneros          |
| DHJPAR0001745 | HIC1263-05   | 657 | DG348660 |  | 14-Feb-2005 | Belvosia Woodley07G | Xylophanes chiron     | Sphingidae  | 05-SRNP-20143   | Area de Conservacion Guanacaste | Sector Guanacaste    | Quebrada Trigal     | 11.02681 | -85.49547 | 290  | Lucia Rios        |
| DHJPAR0001747 | HIC1265-05   | 598 | DG348661 |  | 05-Aug-2004 | Belvosia Woodley07G | Xylophanes gutanensis | Sphingidae  | 04-SRNP-33287   | Area de Conservacion Guanacaste | Sector Pitilla       | Pasmompa            | 11.0193  | -85.41    | 440  | Manuel Rios       |
| DHJPAR0001752 | HIC1270-05   | 496 | DG348662 |  | 11-Nov-2001 | Belvosia Woodley07G | Xylophanes anubus     | Sphingidae  | 01-SRNP-17327   | Area de Conservacion Guanacaste | Sector Santa Rosa    | Sendero Carbonal    | 10.7759  | -85.658   | 7    | guaneros          |
| DHJPAR0001754 | HIC1272-05   | 658 | DG348663 |  | 15-Jan-2001 | Belvosia Woodley07G | Xylophanes gutanensis | Sphingidae  | 00-SRNP-4409    | Area de Conservacion Guanacaste | Sector Pitilla       | Pasmompa            | 11.0193  | -85.41    | 440  | Roster Moraga     |
| DHJPAR0001755 | HIC1273-05   | 593 | DG348664 |  | 16-Nov-2000 | Belvosia Woodley07G | Xylophanes chiron     | Sphingidae  | 00-SRNP-18462   | Area de Conservacion Guanacaste | Sector Santa Rosa    | Sendero Carbonal    | 10.7759  | -85.658   | 7    | guaneros          |
| DHJPAR0001756 | HIC1274-05   | 658 | DG348665 |  | 06-Jul-2000 | Belvosia Woodley07G | Xylophanes pluto      | Sphingidae  | 00-SRNP-7913    | Area de Conservacion Guanacaste | Sector Santa Rosa    | Estero Naranjo      | 10.8043  | -85.6829  | 2    | guaneros          |
| DHJPAR0001758 | HIC1276-05   | 578 | DG348666 |  | 11-Jul-2000 | Belvosia Woodley07G | Xylophanes chiron     | Sphingidae  | 00-SRNP-7704    | Area de Conservacion Guanacaste | Sector Santa Rosa    | Estero Naranjo      | 10.8043  | -85.6829  | 2    | guaneros          |
| DHJPAR0001761 | HIC1279-05   | 658 | DG348667 |  | 13-Dec-1999 | Belvosia Woodley07G | Xylophanes chiron     | Sphingidae  | 99-SRNP-15243   | Area de Conservacion Guanacaste | Sector Orosi         | Maderos             | 11.0049  | -85.4749  | 510  | Roster Moraga     |
| DHJPAR0001767 | HIC1285-05   | 658 | DG348668 |  | 19-Jun-1999 | Belvosia Woodley07G | Xylophanes pluto      | Sphingidae  | 99-SRNP-7136    | Area de Conservacion Guanacaste | Sector Santa Rosa    | Vado Nisperal       | 10.8021  | -85.6537  | 10   | guaneros          |
| DHJPAR0001768 | HIC1286-05   | 658 | DG348669 |  | 18-Jun-1999 | Belvosia Woodley07G | Xylophanes pluto      | Sphingidae  | 99-SRNP-7134    | Area de Conservacion Guanacaste | Sector Santa Rosa    | Vado Nisperal       | 10.8021  | -85.6537  | 10   | guaneros          |
| DHJPAR0001769 | HIC1287-05   | 658 | DG348670 |  | 23-Apr-1999 | Belvosia Woodley07G | Xylophanes chiron     | Sphingidae  | 99-SRNP-2535    | Area de Conservacion Guanacaste | Sector Orosi         | Maderos             | 11.0049  | -85.4749  | 510  | Lucia Rios        |
| DHJPAR0001770 | HIC1288-05   | 610 | DG348671 |  | 04-Mar-1999 | Belvosia Woodley07G | Xylophanes chiron     | Sphingidae  | 99-SRNP-2140    | Area de Conservacion Guanacaste | Sector Orosi         | Maderos             | 11.0049  | -85.4749  | 510  | Roster Moraga     |
| DHJPAR0001771 | HIC1289-05   | 632 | DG348672 |  | 16-Feb-1999 | Belvosia Woodley07G | Unzeila japix         | Sphingidae  | 99-SRNP-2047    | Area de Conservacion Guanacaste | Sector El Hacha      | Sendero Tigre       | 11.0317  | -85.5282  | 280  | Lucia Rios        |
| DHJPAR0001774 | HIC1292-05   | 577 | DG348673 |  | 26-Dec-1998 | Belvosia Woodley07G | Xylophanes Janzen02   | Sphingidae  | 99-SRNP-12466   | Area de Conservacion Guanacaste | Sector Santa Rosa    | Bosque Humedo       | 10.8514  | -85.608   | 290  | guaneros          |
| DHJPAR0001833 | HIC1349-05   | 418 | DG348674 |  | 06-Aug-1998 | Belvosia Woodley07G | Xylophanes pluto      | Sphingidae  | 99-SRNP-8653    | Area de Conservacion Guanacaste | Sector Santa Rosa    | Estero Naranjo      | 10.8043  | -85.6829  | 2    | Manuel Perera     |
| DHJPAR0001836 | HIC1352-05   | 620 | DG348675 |  | 03-Aug-1998 | Belvosia Woodley07G | Xylophanes pluto      | Sphingidae  | 99-SRNP-8739    | Area de Conservacion Guanacaste | Sector Santa Rosa    | Vado Nisperal       | 10.8021  | -85.6537  | 10   | Manuel Perera     |
| DHJPAR0001839 | HIC1355-05   | 577 | DG348676 |  | 12-May-1998 | Belvosia Woodley07G | Xylophanes zurheni    | Sphingidae  | 99-SRNP-6519    | Area de Conservacion Guanacaste | Sector San Cristobal | Sendero Pnyal       | 10.8716  | -85.3933  | 630  | Gloria Smezar     |
| DHJPAR0001840 | HIC1356-05   | 618 | DG348677 |  | 15-Jul-1998 | Belvosia Woodley07G | Erinnyis ocnortus     | Sphingidae  | 98-SRNP-1933    | Area de Conservacion Guanacaste | Sector Santa Rosa    | Cuesta Canyon Tigre | 10.817   | -85.6437  | 270  | guaneros          |
| DHJPAR0001862 | HIC1369-05   | 616 | DG348678 |  | 02-Dec-1994 | Belvosia Woodley07G | Xylophanes chiron     | Sphingidae  | 94-SRNP-9821    | Area de Conservacion Guanacaste | Sector Santa Rosa    | Vado Rio Calera     | 10.8027  | -85.6742  | 10   | guaneros          |
| DHJPAR0001952 | HIC1468-05   | 636 | DG348679 |  | 16-Feb-1999 | Belvosia Woodley07G | Xylophanes anubus     | Sphingidae  | 98-SRNP-14303   | Area de Conservacion Guanacaste | Sector El Hacha      | Sendero Belazuella  | 11.03004 | -85.52899 | 280  | Lucia Rios        |
| DHJPAR0001954 | HIC1470-05   | 658 | DG348680 |  | 2-Aug-1998  | Belvosia Woodley07G | Xylophanes pluto      | Sphingidae  | 98-SRNP-8744    | Area de Conservacion Guanacaste | Sector Santa Rosa    | Vado Nisperal       | 10.80212 | -85.65372 | 10   | Manuel Perera     |
| DHJPAR0001955 | HIC1471-05   | 658 | DG348681 |  | 2-Aug-1998  | Belvosia Woodley07G | Xylophanes pluto      | Sphingidae  | 98-SRNP-8733    | Area de Conservacion Guanacaste | Sector Santa Rosa    | Vado Nisperal       | 10.80212 | -85.65372 | 10   | Guillermo Pereira |
| DHJPAR0001956 | HIC1472-05   | 658 | DG348682 |  | 2-Aug-1998  | Belvosia Woodley07G | Xylophanes pluto      | Sphingidae  | 98-SRNP-8721    | Area de Conservacion Guanacaste | Sector Santa Rosa    | Vado Nisperal       | 10.80212 | -85.65372 | 10   | Ruth Franco       |
| DHJPAR0001957 | HIC1473-05   | 657 | DG348683 |  | 30-Jul-1998 | Belvosia Woodley07G | Xylophanes pluto      | Sphingidae  | 98-SRNP-8570    | Area de Conservacion Guanacaste | Sector Santa Rosa    | Vado Nisperal       | 10.80212 | -85.65372 | 10   | Elieth Carrillano |
| DHJPAR0001958 | HIC1474-05   | 658 | DG348684 |  | 29-Jul-1998 | Belvosia Woodley07G | Xylophanes pluto      | Sphingidae  | 98-SRNP-8509    | Area de Conservacion Guanacaste | Sector Santa Rosa    | Estero Naranjo      | 10.80426 | -85.68286 | 2    | Ruth Franco       |
| DHJPAR0001959 | HIC1475-05   | 658 | DG348685 |  | 27-Jul-1998 | Belvosia Woodley07G | Xylophanes pluto      | Sphingidae  | 98-SRNP-8464    | Area de Conservacion Guanacaste | Sector Santa Rosa    | Vado Nisperal       | 10.80212 | -85.65372 | 10   | Guillermo Pereira |
| DHJPAR0001960 | HIC1476-05   | 659 | DG348686 |  | 29-Jul-1998 | Belvosia Woodley07G | Xylophanes pluto      | Sphingidae  | 98-SRNP-8445    | Area de Conservacion Guanacaste | Sector Santa Rosa    | Vado Nisperal       | 10.80212 | -85.65372 | 10   | Guillermo Pereira |
| DHJPAR0001969 | HIC1515-05   | 533 | DG348687 |  | 22-Aug-1982 | Belvosia Woodley07G | unknownable           | unknownable | 82-SRNP-762     | Area de Conservacion Guanacaste | Sector Santa Rosa    | Bosque San Emilio   | 10.84389 | -85.61384 | 300  | Daniel H. Janzen  |
| DHJPAR0003945 | HIC1749-05   | 625 | DG348685 |  | 30-Jul-2005 | Belvosia Woodley07G | Xylophanes pluto      | Sphingidae  | 05-SRNP-46055   | Area de Conservacion Guanacaste | Sector Cacao         | Quebrada Otilio     | 10.88996 | -85.47966 | 550  | Roster Moraga     |
| DHJPAR0001853 | HIC1369-05   | 629 | DG348689 |  | 19-Aug-1994 | Belvosia Woodley07H | Erinnyis obscura      | Sphingidae  | 94-SRNP-5253    | Area de Conservacion Guanacaste | Sector Santa Rosa    | Tanquetas           | 10.87078 | -85.6035  | 295  | guaneros          |
| DHJPAR0001865 | HIC1481-05   | 663 | DG348690 |  | 20-Aug-1994 | Belvosia Woodley07H | Erinnyis obscura      | Sphingidae  | 94-SRNP-5251    | Area de Conservacion Guanacaste | Sector Santa Rosa    | Tanquetas           | 10.87078 | -85.6035  | 295  | guaneros          |
| DHJPAR0001106 | HIC1006-04</ |     |          |  |             |                     |                       |             |                 |                                 |                      |                     |          |           |      |                   |



|               |            |     |          |             |                    |                        |              |                 |                                 |                      |                       |          |           |     |                        |
|---------------|------------|-----|----------|-------------|--------------------|------------------------|--------------|-----------------|---------------------------------|----------------------|-----------------------|----------|-----------|-----|------------------------|
| DHJPAR0003581 | HCIC685-05 | 625 | DQ348693 | 6-Sep-2005  | Belvosia Woodley08 | Automeris postobida    | Saturniidae  | 05-SRNP-2436    | Area de Conservacion Guanacaste | Sector San Cristobal | San Gabriel           | 10.87766 | -85.39343 | 645 | Yessenia Mendoza       |
| DHJPAR0003582 | HCIC686-05 | 626 | DQ348692 | 17-Aug-2005 | Belvosia Woodley08 | Automeris banus        | Saturniidae  | 05-SRNP-3651    | Area de Conservacion Guanacaste | Sector San Cristobal | Puente Palma          | 10.9163  | -85.37869 | 460 | Gloria Shezar          |
| DHJPAR0003590 | HCIC684-05 | 626 | DQ348691 | 27-Apr-2005 | Belvosia Woodley08 | Automeris banus        | Saturniidae  | 05-SRNP-21273   | Area de Conservacion Guanacaste | Del Oro              | Quebrada Serrano      | 11.00025 | -85.42614 | 585 | Lucia Rios             |
| DHJPAR0001152 | HCIC011-05 | 580 | DQ348707 | 28-Dec-2001 | Belvosia Woodley09 | Eacles Janzen02        | Saturniidae  | 01-SRNP-17572   | Area de Conservacion Guanacaste | Sector Santa Rosa    | Area Administrativa   | 10.8376  | -85.6187  | 295 | Maria Martha Chavarria |
| DHJPAR0001192 | HCIC019-05 | 614 | DQ348708 | 14-Aug-2001 | Belvosia Woodley09 | Eacles Janzen02        | Saturniidae  | 00-SRNP-19862   | Area de Conservacion Guanacaste | Sector Santa Rosa    | Quebrada Costa Rica   | 10.8274  | -85.6365  | 275 | guaneros               |
| DHJPAR0001193 | HCIC027-05 | 375 | DQ348709 | 21-Jun-2001 | Belvosia Woodley09 | Eacles Janzen02        | Saturniidae  | 00-SRNP-19286   | Area de Conservacion Guanacaste | Sector Santa Rosa    | Quebrada Costa Rica   | 10.8274  | -85.6365  | 275 | guaneros               |
| DHJPAR0001194 | HCIC035-05 | 375 | DQ348710 | 15-Dec-1999 | Belvosia Woodley09 | Eacles Janzen02        | Saturniidae  | 90-SRNP-11892   | Area de Conservacion Guanacaste | Sector Santa Rosa    | Quebrada Puercos      | 10.8591  | -85.5709  | 155 | guaneros               |
| DHJPAR0001195 | HCIC043-05 | 561 | DQ348711 | 30-Sep-1996 | Belvosia Woodley09 | Eacles Janzen02        | Saturniidae  | 96-SRNP-5166.10 | Area de Conservacion Guanacaste | Sector Santa Rosa    | Arboles Via           | 10.8608  | -85.6003  | 305 | guaneros               |
| DHJPAR0001196 | HCIC051-05 | 564 | DQ348712 | 11-Sep-1996 | Belvosia Woodley09 | Eacles Janzen02        | Saturniidae  | 96-SRNP-4704.2  | Area de Conservacion Guanacaste | Sector Santa Rosa    | Quebrada Guapote      | 10.8269  | -85.6041  | 240 | guaneros               |
| DHJPAR0001197 | HCIC059-05 | 343 | DQ348713 | 01-Sep-1996 | Belvosia Woodley09 | Eacles Janzen02        | Saturniidae  | 96-SRNP-7532    | Area de Conservacion Guanacaste | Sector Santa Rosa    | Quebrada Guapote      | 10.8269  | -85.6041  | 240 | guaneros               |
| DHJPAR0001198 | HCIC067-05 | 626 | DQ348714 | 11-Aug-1993 | Belvosia Woodley09 | Eacles Janzen02        | Saturniidae  | 93-SRNP-2937    | Area de Conservacion Guanacaste | Sector Santa Rosa    | Llano Guacimal        | 10.8705  | -85.5936  | 265 | guaneros               |
| DHJPAR0001189 | HCIC082-05 | 662 | DQ348715 | 20-Aug-2004 | Belvosia Woodley09 | Eacles Janzen02        | Saturniidae  | 04-SRNP-12478   | Area de Conservacion Guanacaste | Sector Poosol        | Casa Centeno          | 10.8784  | -85.5728  | 215 | Guillermo Pereira      |
| DHJPAR0001190 | HCIC100-05 | 613 | DQ348716 | 21-Jun-2002 | Belvosia Woodley09 | Eacles Janzen02        | Saturniidae  | 01-SRNP-18273   | Area de Conservacion Guanacaste | Sector Santa Rosa    | Cafetal               | 10.8583  | -85.6109  | 280 | Eric Olson             |
| DHJPAR0001911 | HCIC427-05 | 658 | DQ348717 | 30-Aug-1996 | Belvosia Woodley09 | Eacles Janzen02        | Saturniidae  | 96-SRNP-5166.17 | Area de Conservacion Guanacaste | Sector Santa Rosa    | Arboles Via           | 10.8608  | -85.60828 | 305 | guaneros               |
| DHJPAR0001912 | HCIC428-05 | 627 | DQ348718 | 20-Oct-1993 | Belvosia Woodley09 | Eacles Janzen02        | Saturniidae  | 93-SRNP-2941    | Area de Conservacion Guanacaste | Sector Santa Rosa    | Llano Guacimal        | 10.87046 | -85.59359 | 265 | guaneros               |
| DHJPAR0001913 | HCIC429-05 | 658 | DQ348719 | 14-Sep-1993 | Belvosia Woodley09 | Eacles Janzen02        | Saturniidae  | 93-SRNP-2935    | Area de Conservacion Guanacaste | Sector Santa Rosa    | Llano Guacimal        | 10.87046 | -85.59359 | 265 | guaneros               |
| DHJPAR0001914 | HCIC430-05 | 658 | DQ348720 | 15-Aug-1993 | Belvosia Woodley09 | Eacles Janzen02        | Saturniidae  | 93-SRNP-2932    | Area de Conservacion Guanacaste | Sector Santa Rosa    | Llano Guacimal        | 10.87046 | -85.59359 | 265 | guaneros               |
| DHJPAR0001915 | HCIC431-05 | 658 | DQ348721 | 15-Sep-1993 | Belvosia Woodley09 | Eacles Janzen02        | Saturniidae  | 93-SRNP-2928    | Area de Conservacion Guanacaste | Sector Santa Rosa    | Llano Guacimal        | 10.87046 | -85.59359 | 265 | guaneros               |
| DHJPAR0001916 | HCIC432-05 | 641 | DQ348722 | 5-Aug-1993  | Belvosia Woodley09 | Eacles Janzen02        | Saturniidae  | 93-SRNP-2686    | Area de Conservacion Guanacaste | Sector Santa Rosa    | Llano Guacimal        | 10.87046 | -85.59359 | 265 | guaneros               |
| DHJPAR0001917 | HCIC433-05 | 658 | DQ348723 | 18-Jun-1992 | Belvosia Woodley09 | Eacles Janzen02        | Saturniidae  | 91-SRNP-380.7   | Area de Conservacion Guanacaste | Sector Santa Rosa    | Boque Encino Guacimal | 10.8677  | -85.6233  | 285 | guaneros               |
| DHJPAR0001918 | HCIC434-05 | 488 | DQ348724 | 23-Jul-1991 | Belvosia Woodley09 | Eacles Janzen02        | Saturniidae  | 91-SRNP-380.34  | Area de Conservacion Guanacaste | Sector Santa Rosa    | Boque Encino Guacimal | 10.8677  | -85.6233  | 285 | guaneros               |
| DHJPAR0001919 | HCIC435-05 | 658 | DQ348725 | 25-Jul-1991 | Belvosia Woodley09 | Eacles Janzen02        | Saturniidae  | 91-SRNP-380.29  | Area de Conservacion Guanacaste | Sector Santa Rosa    | Boque Encino Guacimal | 10.8677  | -85.6233  | 285 | guaneros               |
| DHJPAR0001920 | HCIC436-05 | 658 | DQ348726 | 9-Oct-1989  | Belvosia Woodley09 | Eacles Janzen02        | Saturniidae  | 89-SRNP-724     | Area de Conservacion Guanacaste | Sector Santa Rosa    | Boque San Emilio      | 10.84389 | -85.61384 | 300 | guaneros               |
| DHJPAR0001921 | HCIC437-05 | 657 | DQ348727 | 25-Aug-1990 | Belvosia Woodley09 | Eacles Janzen02        | Saturniidae  | 90-SRNP-1147    | Area de Conservacion Guanacaste | Sector Santa Rosa    | Lucas                 | 10.85362 | -85.60942 | 300 | guaneros               |
| DHJPAR0001922 | HCIC438-05 | 658 | DQ348728 | 22-Jan-1991 | Belvosia Woodley09 | Eacles Janzen02        | Saturniidae  | 90-SRNP-2989    | Area de Conservacion Guanacaste | Sector Santa Rosa    | Cafetal               | 10.85827 | -85.61089 | 290 | guaneros               |
| DHJPAR0001923 | HCIC439-05 | 657 | DQ348729 | 22-Oct-1991 | Belvosia Woodley09 | Eacles Janzen02        | Saturniidae  | 91-SRNP-380.37  | Area de Conservacion Guanacaste | Sector Santa Rosa    | Boque Encino Guacimal | 10.8677  | -85.6233  | 285 | guaneros               |
| DHJPAR0001924 | HCIC440-05 | 493 | DQ348730 | 30-Sep-1991 | Belvosia Woodley09 | Eacles Janzen02        | Saturniidae  | 91-SRNP-380.26  | Area de Conservacion Guanacaste | Sector Santa Rosa    | Boque Encino Guacimal | 10.8677  | -85.6233  | 285 | guaneros               |
| DHJPAR0001925 | HCIC441-05 | 658 | DQ348731 | 3-Aug-1991  | Belvosia Woodley09 | Eacles Janzen02        | Saturniidae  | 91-SRNP-380.20  | Area de Conservacion Guanacaste | Sector Santa Rosa    | Boque Encino Guacimal | 10.8677  | -85.6233  | 285 | guaneros               |
| DHJPAR0001926 | HCIC442-05 | 658 | DQ348732 | 28-Sep-1991 | Belvosia Woodley09 | Eacles Janzen02        | Saturniidae  | 91-SRNP-380.17  | Area de Conservacion Guanacaste | Sector Santa Rosa    | Boque Encino Guacimal | 10.8677  | -85.6233  | 285 | guaneros               |
| DHJPAR0001927 | HCIC443-05 | 658 | DQ348733 | 27-Sep-1991 | Belvosia Woodley09 | Eacles Janzen02        | Saturniidae  | 91-SRNP-380.8   | Area de Conservacion Guanacaste | Sector Santa Rosa    | Boque Encino Guacimal | 10.8677  | -85.6233  | 285 | guaneros               |
| DHJPAR0001928 | HCIC444-05 | 658 | DQ348734 | 20-Aug-1987 | Belvosia Woodley09 | Eacles Janzen02        | Saturniidae  | 87-SRNP-602     | Area de Conservacion Guanacaste | Sector Santa Rosa    | Sendero Natural       | 10.83575 | -85.61253 | 290 | guaneros               |
| DHJPAR0001929 | HCIC445-05 | 321 | DQ348735 | 2-Nov-1986  | Belvosia Woodley09 | Eacles Janzen02        | Saturniidae  | 86-SRNP-337A    | Area de Conservacion Guanacaste | Sector Santa Rosa    | Boque Humedo          | 10.85145 | -85.60801 | 290 | guaneros               |
| DHJPAR0001930 | HCIC446-05 | 579 | DQ348736 | 26-Sep-1984 | Belvosia Woodley09 | Eacles Janzen02        | Saturniidae  | 84-SRNP-1329G   | Area de Conservacion Guanacaste | Sector Santa Rosa    | Boque Humedo          | 10.85145 | -85.60801 | 290 | Daniel H. Janzen       |
| DHJPAR0001199 | HCIC075-05 | 627 | DQ348737 | 03-Oct-2003 | Belvosia Woodley10 | Citheronia lobesia     | Saturniidae  | 03-SRNP-13506   | Area de Conservacion Guanacaste | Sector Santa Rosa    | Area Administrativa   | 10.8376  | -85.6187  | 295 | Jared Walsh            |
| DHJPAR0001200 | HCIC083-05 | 662 | DQ348738 | 03-Sep-2003 | Belvosia Woodley10 | Citheronia lobesia     | Saturniidae  | 03-SRNP-13337   | Area de Conservacion Guanacaste | Sector Santa Rosa    | Boque San Emilio      | 10.8439  | -85.6138  | 300 | Guillermo Pereira      |
| DHJPAR0001201 | HCIC091-05 | 530 | DQ348739 | 08-Aug-2003 | Belvosia Woodley10 | Citheronia lobesia     | Saturniidae  | 03-SRNP-13372   | Area de Conservacion Guanacaste | Sector Santa Elena   | Porton Perros         | 10.8599  | -85.654   | 340 | Guillermo Pereira      |
| DHJPAR0001202 | HCIC099-05 | 624 | DQ348740 | 26-Sep-2002 | Belvosia Woodley10 | Citheronia lobesia     | Saturniidae  | 03-SRNP-12372   | Area de Conservacion Guanacaste | Sector Santa Rosa    | Area Administrativa   | 10.8376  | -85.6187  | 295 | Joel Diaz              |
| DHJPAR0001203 | HCIC112-05 | 638 | DQ348741 | 08-Apr-2003 | Belvosia Woodley10 | Citheronia lobesia     | Saturniidae  | 03-SRNP-12335   | Area de Conservacion Guanacaste | Sector Santa Rosa    | Area Administrativa   | 10.8376  | -85.6187  | 295 | Joel Diaz              |
| DHJPAR0001204 | HCIC120-05 | 662 | DQ348742 | 29-Mar-2002 | Belvosia Woodley10 | Citheronia lobesia     | Saturniidae  | 01-SRNP-15292   | Area de Conservacion Guanacaste | Sector Santa Rosa    | Camino Borrachos      | 10.8429  | -85.6161  | 295 | Alex Perez             |
| DHJPAR0001205 | HCIC126-05 | 662 | DQ348743 | 15-Aug-2002 | Belvosia Woodley10 | Citheronia lobesia     | Saturniidae  | 02-SRNP-12718   | Area de Conservacion Guanacaste | Sector Santa Rosa    | Tanquetas             | 10.87078 | -85.6033  | 295 | Guillermo Pereira      |
| DHJPAR0001206 | HCIC136-05 | 627 | DQ348744 | 08-Oct-2002 | Belvosia Woodley10 | Citheronia lobesia     | Saturniidae  | 02-SRNP-11782   | Area de Conservacion Guanacaste | Sector Santa Rosa    | Cortafuegos Naranjo   | 10.8352  | -85.6248  | 285 | Jeff Klemens           |
| DHJPAR0001207 | HCIC144-05 | 375 | DQ348745 | 21-Feb-1997 | Belvosia Woodley10 | Citheronia lobesia     | Saturniidae  | 86-SRNP-5686    | Area de Conservacion Guanacaste | Sector Santa Rosa    | Cafetal               | 10.8583  | -85.6109  | 280 | guaneros               |
| DHJPAR0001208 | HCIC152-05 | 375 | DQ348746 | 23-Aug-1996 | Belvosia Woodley10 | Citheronia lobesia     | Saturniidae  | 86-SRNP-5622    | Area de Conservacion Guanacaste | Sector Santa Rosa    | Chirring              | 10.8388  | -85.601   | 250 | guaneros               |
| DHJPAR0001891 | HCIC407-05 | 635 | DQ348747 | 15-Aug-2002 | Belvosia Woodley10 | Citheronia lobesia     | Saturniidae  | 02-SRNP-12717   | Area de Conservacion Guanacaste | Sector Santa Rosa    | Tanquetas             | 10.87078 | -85.6033  | 295 | Guillermo Pereira      |
| DHJPAR0001892 | HCIC408-05 | 655 | DQ348748 | 6-Oct-2002  | Belvosia Woodley10 | Citheronia lobesia     | Saturniidae  | 02-SRNP-11780   | Area de Conservacion Guanacaste | Sector Santa Rosa    | Cortafuegos Naranjo   | 10.83525 | -85.62485 | 285 | Jeff Klemens           |
| DHJPAR0001893 | HCIC409-05 | 582 | DQ348749 | 24-Aug-1996 | Belvosia Woodley10 | Citheronia lobesia     | Saturniidae  | 96-SRNP-5623    | Area de Conservacion Guanacaste | Sector Santa Rosa    | Chirring              | 10.83881 | -85.60097 | 250 | guaneros               |
| DHJPAR0001894 | HCIC410-05 | 658 | DQ348748 | 28-Sep-1994 | Belvosia Woodley10 | Citheronia lobesia     | Saturniidae  | 94-SRNP-4970    | Area de Conservacion Guanacaste | Sector Poosol        | Quebrada Aserradero   | 10.89857 | -85.56419 | 160 | guaneros               |
| DHJPAR0001895 | HCIC411-05 | 656 | DQ348749 | 28-Jul-1994 | Belvosia Woodley10 | Citheronia lobesia     | Saturniidae  | 94-SRNP-4317    | Area de Conservacion Guanacaste | Sector Santa Rosa    | Area Administrativa   | 10.83764 | -85.61871 | 295 | guaneros               |
| DHJPAR0001896 | HCIC412-05 | 566 | DQ348750 | 22-Jul-1994 | Belvosia Woodley10 | Citheronia lobesia     | Saturniidae  | 94-SRNP-3922    | Area de Conservacion Guanacaste | Sector Santa Rosa    | Vado Cuijiquil        | 10.86268 | -85.61202 | 255 | guaneros               |
| DHJPAR0001897 | HCIC413-05 | 554 | DQ348751 | 4-Aug-1993  | Belvosia Woodley10 | Citheronia lobesia     | Saturniidae  | 93-SRNP-2945    | Area de Conservacion Guanacaste | Sector Santa Rosa    | Boque Encino Guacimal | 10.8677  | -85.60233 | 285 | guaneros               |
| DHJPAR0001898 | HCIC414-05 | 324 | DQ348752 | 5-Aug-1993  | Belvosia Woodley10 | Citheronia lobesia     | Saturniidae  | 93-SRNP-2944    | Area de Conservacion Guanacaste | Sector Santa Rosa    | Boque Encino Guacimal | 10.8677  | -85.60233 | 285 | guaneros               |
| DHJPAR0001899 | HCIC415-05 | 559 | DQ348753 | 10-Dec-1993 | Belvosia Woodley10 | Citheronia lobesia     | Saturniidae  | 93-SRNP-2692    | Area de Conservacion Guanacaste | Sector Santa Rosa    | Cafetal               | 10.85927 | -85.61089 | 280 | guaneros               |
| DHJPAR0001900 | HCIC416-05 | 658 | DQ348754 | 25-Jan-1994 | Belvosia Woodley10 | Citheronia lobesia     | Saturniidae  | 93-SRNP-2639    | Area de Conservacion Guanacaste | Sector Santa Rosa    | Laguna Escondida      | 10.84967 | -85.63046 | 285 | guaneros               |
| DHJPAR0001901 | HCIC417-05 | 656 | DQ348755 | 27-Jul-1993 | Belvosia Woodley10 | Citheronia lobesia     | Saturniidae  | 93-SRNP-2832    | Area de Conservacion Guanacaste | Sector Santa Rosa    | Laguna Escondida      | 10.84967 | -85.63046 | 285 | guaneros               |
| DHJPAR0001902 | HCIC418-05 | 658 | DQ348756 | 8-Aug-1993  | Belvosia Woodley10 | Citheronia lobesia     | Saturniidae  | 93-SRNP-2640    | Area de Conservacion Guanacaste | Sector Santa Rosa    | Laguna Escondida      | 10.84967 | -85.63046 | 285 | guaneros               |
| DHJPAR0001903 | HCIC419-05 | 658 | DQ348757 | 8-Aug-1993  | Belvosia Woodley10 | Citheronia lobesia     | Saturniidae  | 93-SRNP-2509    | Area de Conservacion Guanacaste | Sector Santa Rosa    | Tanquetas             | 10.87078 | -85.6033  | 295 | guaneros               |
| DHJPAR0001904 | HCIC420-05 | 330 | DQ348758 | 11-Jun-1989 | Belvosia Woodley10 | unknown                | unknown      | 89-SRNP-165     | Area de Conservacion Guanacaste | Sector Santa Rosa    | Tanquetas             | 10.87078 | -85.6033  | 295 | Daniel H. Janzen       |
| DHJPAR0001905 | HCIC421-05 | 325 | DQ348759 | 1-Jan-1990  | Belvosia Woodley10 | Citheronia lobesia     | Saturniidae  | 89-SRNP-1148    | Area de Conservacion Guanacaste | Sector Santa Rosa    | Area Administrativa   | 10.83764 | -85.61871 | 295 | guaneros               |
| DHJPAR0001906 | HCIC422-05 | 658 | DQ348760 | 3-Sep-1989  | Belvosia Woodley10 | Citheronia lobesia     | Saturniidae  | 89-SRNP-1148    | Area de Conservacion Guanacaste | Sector Santa Rosa    | Area Administrativa   | 10.83764 | -85.61871 | 295 | guaneros               |
| DHJPAR0001907 | HCIC423-05 | 323 | DQ348761 | 13-Aug-1986 | Belvosia Woodley10 | Citheronia lobesia     | Saturniidae  | 86-SRNP-916     | Area de Conservacion Guanacaste | Sector Santa Rosa    | Cafetal               | 10.85827 | -85.61089 | 280 | guaneros               |
| DHJPAR0001908 | HCIC424-05 | 627 | DQ348762 | 29-Jul-1985 | Belvosia Woodley10 | Citheronia lobesia     | Saturniidae  | 85-SRNP-473E    | Area de Conservacion Guanacaste | Sector Santa Rosa    | Tanquetas             | 10.87078 | -85.6033  | 295 | guaneros               |
| DHJPAR0001909 | HCIC425-05 | 324 | DQ348763 | 8-Sep-1979  | Belvosia Woodley10 | Citheronia lobesia     | Saturniidae  | 79-SRNP-293     | Area de Conservacion Guanacaste | Sector Santa Rosa    | Area Administrativa   | 10.83764 | -85.61871 | 295 | Daniel H. Janzen       |
| DHJPAR0001910 | HCIC426-05 | 324 | DQ348764 | 20-Jul-1991 | Belvosia Woodley10 | Citheronia lobesia     | Saturniidae  | 91-SRNP-877.1   | Area de Conservacion Guanacaste | Sector Santa Rosa    | Area Administrativa   | 10.83764 | -85.61871 | 295 | guaneros               |
| DHJPAR0001214 | HCIC111-05 | 566 | DQ348765 | 17-Aug-1998 | Belvosia Woodley11 | Dasyplophia basitincta | Notodontidae | 86-SRNP-10191   | Area de Conservacion Guanacaste | Sector Santa Rosa    | Cafetal               | 10.8583  | -85.6109  | 280 | Guillermo Pereira      |
| DHJPAR0001215 | HCIC119-05 | 366 | DQ348767 | 07-Aug-1998 | Belvosia Woodley11 | Dasyplophia basitincta | Notodontidae | 86-SRNP-9881    | Area de Conservacion Guanacaste | Sector Santa Rosa    | Area Administrativa   | 10.8376  | -85.6187  | 295 | Daniel H. Janzen       |
| DHJPAR0001216 | HCIC127-05 | 662 | DQ348768 | 21-Aug-1994 | Belvosia Woodley11 | Pentobesa pinn         | Notodontidae | 94-SRNP-6000    | Area de Conservacion Guanacaste | Sector Poosol        | Quebrada Aserradero   | 10.8986  | -85.5642  | 160 | guaneros               |
| DHJPAR0001217 | HCIC135-05 | 662 | DQ348769 | 25-Jul-2002 | Belvosia Woodley11 | Dasyplophia Janzen02   | Notodontidae | 02-SRNP-12585   | Area de Conservacion Guanacaste | Sector Santa Elena   | Vado Quebrada Calera  | 10.8668  | -85.6465  | 305 | guaneros               |
| DHJPAR0001218 | HCIC143-05 | 620 | DQ348770 | 31-Jul-2002 | Belvosia Woodley11 | Dasyplophia Janzen02   | Notodontidae | 02-SRNP-12563   | Area de Conservacion Guanacaste | Sector Santa Elena   | Vado Quebrada Calera  | 10.8668  | -85.6465  | 305 | guaneros               |
| DHJPAR0001209 | HCIC160-05 | 373 | DQ       |             |                    |                        |              |                 |                                 |                      |                       |          |           |     |                        |

|               |             |     |          |  |             |                    |                      |              |               |                                 |                      |                     |          |           |      |                   |
|---------------|-------------|-----|----------|--|-------------|--------------------|----------------------|--------------|---------------|---------------------------------|----------------------|---------------------|----------|-----------|------|-------------------|
| DHJPAR0001712 | HICIC230-05 | 658 | DG348781 |  | 26-May-2000 | Belvisia Woodley14 | Ochrodota marina     | Arctidae     | 00-SRNP-9394  | Area de Conservacion Guanacaste | Sector Cacao         | Sendero Saito       | 10.9302  | -85.4694  | 1000 | Mariano Pereira   |
| DHJPAR0001713 | HICIC231-05 | 632 | DG348782 |  | 15-May-2000 | Belvisia Woodley14 | Ochrodota marina     | Arctidae     | 04-SRNP-9378  | Area de Conservacion Guanacaste | Sector Cacao         | Sendero Saito       | 10.9302  | -85.4694  | 1000 | Mariano Pereira   |
| DHJPAR0001714 | HICIC232-05 | 658 | DG348783 |  | 12-Apr-2004 | Belvisia Woodley14 | Ochrodota pronapides | Arctidae     | 04-SRNP-1331  | Area de Conservacion Guanacaste | Sector San Cristobal | Puente Palma        | 10.9163  | -85.3787  | 460  | Elda Araya        |
| DHJPAR0001715 | HICIC233-05 | 658 | DG348784 |  | 11-Apr-2004 | Belvisia Woodley14 | Ochrodota pronapides | Arctidae     | 04-SRNP-1329  | Area de Conservacion Guanacaste | Sector San Cristobal | Puente Palma        | 10.9163  | -85.3787  | 460  | Elda Araya        |
| DHJPAR0001252 | HICIC132-05 | 525 | DG348786 |  | 22-Jul-2001 | Belvisia Woodley15 | Hapigia repandens    | Notodontidae | 01-SRNP-9514  | Area de Conservacion Guanacaste | Del Oro              | Quebrada Serrano    | 11.0002  | -85.4561  | 585  | Roster Moraga     |
| DHJPAR0001253 | HICIC140-05 | 662 | DG348787 |  | 03-Feb-2004 | Belvisia Woodley15 | Hapigia repandens    | Notodontidae | 03-SRNP-37038 | Area de Conservacion Guanacaste | Sector Pilla         | Pasmompa            | 11.0193  | -85.41    | 440  | Petrona Rios      |
| DHJPAR0001254 | HICIC148-05 | 662 | DG348788 |  | 02-Apr-2002 | Belvisia Woodley15 | Anteaia Ichy         | Notodontidae | 02-SRNP-6337  | Area de Conservacion Guanacaste | Rincon Rainforest    | Sendero Rincon      | 10.8962  | -85.2777  | 430  | Fraysi Vargas     |
| DHJPAR0003568 | HICIC692-05 | 623 | DG348785 |  | 15-Oct-2005 | Belvisia Woodley15 | Hapigia repandens    | Notodontidae | 05-SRNP-33276 | Area de Conservacion Guanacaste | Sector Pilla         | Pasmompa            | 11.01926 | -85.40997 | 440  | Petrona Rios      |
| DHJPAR0001225 | HICIC110-05 | 662 | DG348789 |  | 15-Mar-2002 | Belvisia Woodley16 | Arsenura armida      | Saturniidae  | 01-SRNP-21340 | Area de Conservacion Guanacaste | Sector Cacao         | Sendero Maritza     | 10.9364  | -85.4776  | 760  | gusaneros         |
| DHJPAR0001226 | HICIC118-05 | 662 | DG348790 |  | 02-Mar-2002 | Belvisia Woodley16 | Arsenura armida      | Saturniidae  | 01-SRNP-21309 | Area de Conservacion Guanacaste | Sector Cacao         | Sendero Maritza     | 10.9364  | -85.4776  | 760  | gusaneros         |
| DHJPAR0001227 | HICIC126-05 | 662 | DG348791 |  | 16-Mar-2002 | Belvisia Woodley16 | Arsenura armida      | Saturniidae  | 01-SRNP-21394 | Area de Conservacion Guanacaste | Sector Cacao         | Sendero Maritza     | 10.9364  | -85.4776  | 760  | gusaneros         |
| DHJPAR0001228 | HICIC134-05 | 662 | DG348792 |  | 07-Mar-2002 | Belvisia Woodley16 | Arsenura armida      | Saturniidae  | 01-SRNP-21362 | Area de Conservacion Guanacaste | Sector Cacao         | Sendero Maritza     | 10.9364  | -85.4776  | 760  | gusaneros         |
| DHJPAR0001219 | HICIC151-05 | 662 | DG348793 |  | 05-Jul-2002 | Belvisia Woodley16 | Arsenura armida      | Saturniidae  | 01-SRNP-21381 | Area de Conservacion Guanacaste | Sector Cacao         | Sendero Maritza     | 10.9364  | -85.4776  | 760  | gusaneros         |
| DHJPAR0001220 | HICIC159-05 | 662 | DG348794 |  | 01-Jul-2002 | Belvisia Woodley16 | Arsenura armida      | Saturniidae  | 01-SRNP-21277 | Area de Conservacion Guanacaste | Sector Cacao         | Sendero Maritza     | 10.9364  | -85.4776  | 760  | gusaneros         |
| DHJPAR0001221 | HICIC167-05 | 662 | DG348795 |  | 06-Jun-2002 | Belvisia Woodley16 | Arsenura armida      | Saturniidae  | 01-SRNP-21404 | Area de Conservacion Guanacaste | Sector Cacao         | Sendero Maritza     | 10.9364  | -85.4776  | 760  | gusaneros         |
| DHJPAR0001222 | HICIC175-05 | 662 | DG348796 |  | 10-Jun-2002 | Belvisia Woodley16 | Arsenura armida      | Saturniidae  | 01-SRNP-21446 | Area de Conservacion Guanacaste | Sector Cacao         | Sendero Maritza     | 10.9364  | -85.4776  | 760  | gusaneros         |
| DHJPAR0001223 | HICIC183-05 | 658 | DG348797 |  | 26-Mar-2002 | Belvisia Woodley16 | Arsenura armida      | Saturniidae  | 01-SRNP-21237 | Area de Conservacion Guanacaste | Sector Cacao         | Sendero Maritza     | 10.9364  | -85.4776  | 760  | gusaneros         |
| DHJPAR0001224 | HICIC191-05 | 662 | DG348798 |  | 23-Jul-2002 | Belvisia Woodley16 | Arsenura armida      | Saturniidae  | 01-SRNP-21428 | Area de Conservacion Guanacaste | Sector Cacao         | Sendero Maritza     | 10.9364  | -85.4776  | 760  | gusaneros         |
| DHJPAR0001237 | HICIC199-05 |     |          |  | 26-Jun-1994 | Belvisia Woodley17 | Pseuditelia sequax   | Noctuidae    | 34-SRNP-3141  | Area de Conservacion Guanacaste | Sector Santa Rosa    | Vaño Cujuniquil     | 10.8827  | -85.612   | 255  | gusaneros         |
| DHJPAR0001238 | HICIC117-05 | 375 | DG348799 |  | 23-Jun-1994 | Belvisia Woodley17 | Pseuditelia sequax   | Noctuidae    | 34-SRNP-3146  | Area de Conservacion Guanacaste | Sector Santa Rosa    | Vaño Cujuniquil     | 10.8827  | -85.612   | 255  | gusaneros         |
| DHJPAR0001239 | HICIC142-05 | 662 | DG348800 |  | 21-May-2001 | Belvisia Woodley17 | Pseuditelia sequax   | Noctuidae    | 02-SRNP-8709  | Area de Conservacion Guanacaste | Sector Cacao         | Estacion Cacao      | 10.9269  | -85.4682  | 1150 | Harry Ramirez     |
| DHJPAR0001230 | HICIC150-05 | 374 | DG348801 |  | 18-May-2002 | Belvisia Woodley17 | Pseuditelia sequax   | Noctuidae    | 02-SRNP-8747  | Area de Conservacion Guanacaste | Sector Cacao         | Estacion Cacao      | 10.9269  | -85.4682  | 1150 | Harry Ramirez     |
| DHJPAR0001231 | HICIC158-05 | 662 | DG348802 |  | 13-May-2002 | Belvisia Woodley17 | Pseuditelia sequax   | Noctuidae    | 02-SRNP-8765  | Area de Conservacion Guanacaste | Sector Cacao         | Estacion Cacao      | 10.9269  | -85.4682  | 1150 | Harry Ramirez     |
| DHJPAR0001232 | HICIC166-05 | 375 | DG348803 |  | 18-May-2002 | Belvisia Woodley17 | Pseuditelia sequax   | Noctuidae    | 02-SRNP-8766  | Area de Conservacion Guanacaste | Sector Cacao         | Estacion Cacao      | 10.9269  | -85.4682  | 1150 | Harry Ramirez     |
| DHJPAR0001233 | HICIC174-05 | 375 | DG348804 |  | 16-May-2002 | Belvisia Woodley17 | Pseuditelia sequax   | Noctuidae    | 02-SRNP-8806  | Area de Conservacion Guanacaste | Sector Cacao         | Estacion Cacao      | 10.9269  | -85.4682  | 1150 | Freddy Quesada    |
| DHJPAR0001234 | HICIC182-05 | 662 | DG348805 |  | 23-May-2002 | Belvisia Woodley17 | Pseuditelia sequax   | Noctuidae    | 02-SRNP-8835  | Area de Conservacion Guanacaste | Sector Cacao         | Estacion Cacao      | 10.9269  | -85.4682  | 1150 | Freddy Quesada    |
| DHJPAR0001235 | HICIC190-05 | 662 | DG348806 |  | 23-May-2002 | Belvisia Woodley17 | Pseuditelia sequax   | Noctuidae    | 02-SRNP-8947  | Area de Conservacion Guanacaste | Sector Cacao         | Estacion Cacao      | 10.9269  | -85.4682  | 1150 | Freddy Quesada    |
| DHJPAR0001236 | HICIC198-05 | 662 | DG348807 |  | 23-May-2002 | Belvisia Woodley17 | Pseuditelia sequax   | Noctuidae    | 02-SRNP-8963  | Area de Conservacion Guanacaste | Sector Cacao         | Estacion Cacao      | 10.9269  | -85.4682  | 1150 | Freddy Quesada    |
| DHJPAR0001255 | HICIC156-05 | 374 | DG348808 |  | 09-Oct-2000 | Belvisia Woodley18 | Xylophanes tyndarus  | Sphingidae   | 03-SRNP-2873  | Area de Conservacion Guanacaste | Sector El Hacha      | Sendero Congos      | 11.021   | -85.5253  | 290  | Roster Moraga     |
| DHJPAR0001256 | HICIC164-05 | 372 | DG348809 |  | 30-Aug-2003 | Belvisia Woodley18 | Xylophanes pisticina | Sphingidae   | 03-SRNP-15833 | Area de Conservacion Guanacaste | Del Oro              | Sendero Puertas     | 11.0109  | -85.4882  | 400  | Manuel Pereira    |
| DHJPAR0001257 | HICIC172-05 | 375 | DG348810 |  | 14-Jun-2003 | Belvisia Woodley18 | Xylophanes tyndarus  | Sphingidae   | 02-SRNP-15799 | Area de Conservacion Guanacaste | Sector El Hacha      | Sendero Bejuquilla  | 11.03    | -85.527   | 280  | Lucia Rios        |
| DHJPAR0001258 | HICIC180-05 | 662 | DG348811 |  | 25-Sep-2002 | Belvisia Woodley18 | Xylophanes tyndarus  | Sphingidae   | 02-SRNP-16241 | Area de Conservacion Guanacaste | Sector El Hacha      | Sendero Bejuquilla  | 11.03    | -85.527   | 280  | Lucia Rios        |
| DHJPAR0001259 | HICIC188-05 | 662 | DG348812 |  | 21-Aug-2003 | Belvisia Woodley18 | Xylophanes pisticina | Sphingidae   | 03-SRNP-15015 | Area de Conservacion Guanacaste | Del Oro              | Sendero Puertas     | 11.0109  | -85.4882  | 400  | Elieth Carrillano |
| DHJPAR0001242 | HICIC149-05 | 662 | DG348813 |  | 07-Oct-2001 | Belvisia Woodley19 | Rothschildia triloba | Saturniidae  | 01-SRNP-1143  | Area de Conservacion Guanacaste | Sector San Cristobal | Sendero Perdido     | 10.8794  | -85.3861  | 620  | Gloria Shezhar    |
| DHJPAR0001243 | HICIC157-05 | 662 | DG348814 |  | 21-Nov-2001 | Belvisia Woodley19 | Rothschildia triloba | Saturniidae  | 01-SRNP-1141  | Area de Conservacion Guanacaste | Sector San Cristobal | Sendero Perdido     | 10.8794  | -85.3861  | 620  | Gloria Shezhar    |
| DHJPAR0001244 | HICIC165-05 | 662 | DG348815 |  | 21-Nov-2001 | Belvisia Woodley19 | Rothschildia triloba | Saturniidae  | 01-SRNP-1141  | Area de Conservacion Guanacaste | Sector San Cristobal | Sendero Perdido     | 10.8794  | -85.3861  | 620  | Gloria Shezhar    |
| DHJPAR0001245 | HICIC173-05 | 662 | DG348816 |  | 21-Nov-2001 | Belvisia Woodley19 | Rothschildia triloba | Saturniidae  | 01-SRNP-1141  | Area de Conservacion Guanacaste | Sector San Cristobal | Sendero Perdido     | 10.8794  | -85.3861  | 620  | Gloria Shezhar    |
| DHJPAR0001249 | HICIC108-05 | 662 | DG348817 |  | 01-Jan-2005 | Belvisia Woodley20 | Dicentrina violacea  | Notodontidae | 04-SRNP-16036 | Area de Conservacion Guanacaste | Sector Santa Rosa    | Area Administrativa | 10.8376  | -85.6187  | 295  | Jorge Hernandez   |
| DHJPAR0001250 | HICIC116-05 | 369 | DG348818 |  | 02-Jan-2005 | Belvisia Woodley20 | Dicentrina violacea  | Notodontidae | 04-SRNP-16010 | Area de Conservacion Guanacaste | Sector Santa Rosa    | Area Administrativa | 10.8376  | -85.6187  | 295  | Ruth Franco       |
| DHJPAR0001251 | HICIC124-05 | 662 | DG348819 |  | 01-Jan-2005 | Belvisia Woodley20 | Dicentrina violacea  | Notodontidae | 04-SRNP-16037 | Area de Conservacion Guanacaste | Sector Santa Rosa    | Area Administrativa | 10.8376  | -85.6187  | 295  | Jorge Hernandez   |
| DHJPAR0001248 | HICIC197-05 | 375 | DG348820 |  | 01-Jan-2005 | Belvisia Woodley20 | Dicentrina violacea  | Notodontidae | 04-SRNP-16033 | Area de Conservacion Guanacaste | Sector Santa Rosa    | Area Administrativa | 10.8376  | -85.6187  | 295  | Jorge Hernandez   |
