# Supplementary material
Source: PubMed Central journal article supplement (PMC1450138)
Supplement: pnas_0511318103_3.pdf [file pnas_0511318103_3.pdf]

Appendix 3: A representative alignment of the ITS1 region for the *Belvosia* Woodley04 species complex using three individuals per species. W4A = *B. Woodley04A*, W4B = *B. Woodley04B*, W4C = *B. Woodley04C*, W4D = *B. Woodley04D*.

|                |             |             |             |             |             |             |
|----------------|-------------|-------------|-------------|-------------|-------------|-------------|
|                | ..... ..... | ..... ..... | ..... ..... | ..... ..... | ..... ..... | ..... ..... |
|                | 10          | 20          | 30          | 40          | 50          | 60          |
| HCIC621-05-W4A | -----       | -----       | -----CGGAT  | GTTTCGCAGA  | AGTTGACCGA  | ACTTGATTAT  |
| HCIC644-05-W4A | -----       | ----CCTGAG  | TGTAGCGGAT  | GTTTCGCAGA  | AGTTGACCGA  | ACTTGATTAT  |
| HCIC658-05-W4A | -----       | -----       | -----       | -----       | -----       | -----       |
| HCIC246-05-W4B | --TCACTGTA  | ACGCCCTGAG  | TGTTGCGGAT  | GTTTCGCAGA  | AGTAGACCGA  | ACTTGATTAT  |
| HCIC252-05-W4B | --TCACTGTA  | ACGCCCTGAG  | TGTTGCGGAT  | GTTTCGCAGA  | AGTTGACCGA  | ACTTGATTAT  |
| HCIC608-05-W4B | -----CTGTA  | ACGCCCTGAG  | TGTTGCGGAT  | GTTTCGCAGA  | AGTTGACCGA  | ACTTGATTAT  |
| HCIC554-05-W4D | -----       | -----       | -----       | -----       | -----       | -----       |
| HCIC539-05-W4D | -----       | -----TGAG   | TGTTGCGGAT  | GTTTCGCAGA  | AGTTGACCGA  | ACTTGATTAT  |
| HCIC540-05-W4D | -----       | -----TGAG   | TGTTGCGGAT  | GTTTCGCAGA  | AGTTGACCGA  | ACTTGATTAT  |
| HCIC536-05-W4C | -TCACANGTA  | ACGCCCTGAG  | TGTTGCGGAT  | GTTTCGCAGA  | AGTTGACCGA  | ACTTGATTAT  |
| HCIC533-05-W4C | GATCACTGTA  | ACGCCCTGAG  | TGTTGCGGAT  | GTTTCGCAGA  | AGTTGACCGA  | ACTTGATTAT  |
| HCIC535-05-W4C | --TCACTGTA  | ACGCCCTGAG  | TGTTGCGGAT  | GTTTCGCAGA  | ANTTGACCGA  | ACTTGATTAT  |

|                |             |             |             |             |             |             |
|----------------|-------------|-------------|-------------|-------------|-------------|-------------|
|                | ..... ..... | ..... ..... | ..... ..... | ..... ..... | ..... ..... | ..... ..... |
|                | 70          | 80          | 90          | 100         | 110         | 120         |
| HCIC621-05-W4A | TTAGAGGAAG  | TAAAAGTCGT  | AACAAGGTTT  | CCGTAGGTGA  | ACCTGCGGAA  | GGATCAT-AA  |
| HCIC644-05-W4A | TTAGAGGAAG  | TAAAAGTCGT  | AACAAGGTTT  | CCGTAGGTGA  | ACCTGCGGAA  | GGATCAT-AA  |
| HCIC658-05-W4A | -----       | -----       | -----       | -----       | -----       | -----       |
| HCIC246-05-W4B | TTAGAGGAAG  | TAAAAGTCGT  | AACAAGGTTT  | CCGTAGGTGA  | ACCTGCGGAA  | GGATCATTAA  |
| HCIC252-05-W4B | TTAGAGGAAG  | TAAAAGTCGT  | AACAAGGTTT  | CCGTAGGTGA  | ACCTGCGGAA  | GGATCATTAA  |
| HCIC608-05-W4B | TTNAAGGAAG  | TAAAAGTCGT  | AACAAGGTTT  | CCGTAGGTGA  | ACCTGCGGAA  | GGATCANTNA  |
| HCIC554-05-W4D | -----       | -----       | -----       | -----       | -----       | -----       |
| HCIC539-05-W4D | TTAGAGGAAG  | TAAAAGTCGT  | AACAAGGTTT  | CCGTAGGTGA  | ACCTGCGGAA  | GGATCAT-AA  |
| HCIC540-05-W4D | TTAGAGGAAG  | TAAAAGTCGT  | AACAAGGTTT  | CCGTAGGTGA  | ACCTGCGGAA  | GGATCATTAA  |
| HCIC536-05-W4C | TTAGAGGAAG  | TAAAAGTCGT  | AACAAGGTTT  | CC-TAGGTGA  | ACCTGCGGAA  | GGATCATTAA  |
| HCIC533-05-W4C | TTAGAGGAAG  | TAAAAGTCGT  | AACAAGGTTT  | CC-TAGGTGA  | ACCTGCGGAA  | GGATCATTAA  |
| HCIC535-05-W4C | TTAGAGGAAG  | TAAAAGTCGT  | AACAAGGTTT  | CC-TAGGTGA  | ACCTGCGGAA  | GGATCATTAA  |

|                |             |             |             |             |             |             |
|----------------|-------------|-------------|-------------|-------------|-------------|-------------|
|                | ..... ..... | ..... ..... | ..... ..... | ..... ..... | ..... ..... | ..... ..... |
|                | 130         | 140         | 150         | 160         | 170         | 180         |
| HCIC621-05-W4A | AGTTCTCCTT  | TCAAGTTATA  | AACAAAAACA  | CAATATATAA  | AATACTTATA  | TTGTAAAATT  |
| HCIC644-05-W4A | AGTTCTCCTT  | TCAAGTTATA  | AACAAAAACA  | CAATATATAA  | AATACTTATA  | TTGTAAAATT  |
| HCIC658-05-W4A | -----       | -----ATA    | AACAAAAACA  | CAATATATAA  | AATACTTATA  | TTGTAAAATT  |
| HCIC246-05-W4B | AGTTATCC-T  | TACAGTTATA  | AACAAAAACA  | CAATATATAA  | AATACTTATA  | TTGTAAAATT  |
| HCIC252-05-W4B | AGTTATCC-T  | TACAGTTATA  | AACAAAAACA  | CAATATATAA  | AATACTTATA  | TTGTAAAATT  |
| HCIC608-05-W4B | AGTTATCC-T  | TACAGTTATA  | AACAAAAACA  | CAATATATAA  | AATACTTATA  | TTGTAAAATT  |
| HCIC554-05-W4D | -----       | -----       | -----       | -----       | -----       | -----       |
| HCIC539-05-W4D | AGTTCTCAT   | TACAGTTATA  | AACAAAAACA  | CAATATATAA  | AATACTTATA  | TTGTAAAATT  |
| HCIC540-05-W4D | AGTTCTCAT   | TACAGTTATA  | AACAAAAACA  | CAATATATAA  | AATACTTATA  | TTGTAAAATT  |
| HCIC536-05-W4C | AGTTCTCC-T  | TACAGTTATA  | AACAAAAACA  | CAATATATAA  | AATACTTATA  | TTGTAAAATT  |
| HCIC533-05-W4C | AGTTCTCC-T  | TACAGTTATA  | AACAAAAACA  | CAATATATAA  | AATACTTATA  | TTGTAAAATT  |
| HCIC535-05-W4C | AGTTCTCC-T  | TACAGTTATA  | AACAAAAACA  | CAATATATAA  | AATACTTATA  | TTGTAAAATT  |

|                |             |             |             |             |             |             |
|----------------|-------------|-------------|-------------|-------------|-------------|-------------|
|                | ..... ..... | ..... ..... | ..... ..... | ..... ..... | ..... ..... | ..... ..... |
|                | 190         | 200         | 210         | 220         | 230         | 240         |
| HCIC621-05-W4A | ATGGCAAATG  | CCAAAAAGAA  | ACAAAATAAC  | AATAATAAAA  | ATGTTTATTA  | TTGTAT--CG  |
| HCIC644-05-W4A | ATGGCAAATG  | CCAAAAAGAA  | ACAAAATAAC  | AATAATAAAA  | ATGTTTATTA  | TTGTAT--CG  |
| HCIC658-05-W4A | ATGGCAAATG  | CCAAAAAGAA  | ACAAAATAAC  | AATAATAAAA  | ATGTTTATTA  | TTGTAT--CG  |
| HCIC246-05-W4B | ATGGCAAATG  | CCAAAAAGAA  | ACAAAATAAC  | AATAATAAAA  | ATGTTTATTA  | TTGTAT--CG  |
| HCIC252-05-W4B | ATGGCAAATG  | CCAAAAAGAA  | ACAAAATAAC  | AATAATAAAA  | ATGTTTATTA  | TTGTAT--CG  |
| HCIC608-05-W4B | ATGGCAAATG  | CCAAAAAGAA  | ACAAAATAAC  | AATAATAAAA  | ATGTTTATTA  | TTGTAT--CG  |
| HCIC554-05-W4D | --GGCAAATG  | CCAAAAAGAA  | ACAAAATAAC  | AATAATAAAA  | -TGTTTATTA  | TTGTAT-CCG  |
| HCIC539-05-W4D | ATGGCAAATG  | CCAAAAAGAA  | ACAAAATAAC  | AATAATAAAA  | -TGTTTATTA  | TTGTAT-CCG  |
| HCIC540-05-W4D | ATGGCAAATG  | CCAAAAAGAA  | ACAAAATAAC  | AATAATAAAA  | -TGTTTATTA  | TTGTAT-CCG  |
| HCIC536-05-W4C | ATGGCAAAAAG | CCAAAAAGAA  | ACAAAATAAC  | AATAATAAAA  | -TGTTTATTA  | TTGTATATCG  |
| HCIC533-05-W4C | ATGGCAAAAAG | CCAAAAAGAA  | ACAAAATAAC  | AATAATAAAA  | -TGTTTATTA  | TTGTATATCG  |
| HCIC535-05-W4C | ATGGCAAAAAG | CCAAAAAGAA  | ACAAAATAAC  | AATAATAAAA  | -TGTTTATTA  | TTGTATATCG  |

|                       |             |             |             |             |             |             |
|-----------------------|-------------|-------------|-------------|-------------|-------------|-------------|
|                       | ..... ..... | ..... ..... | ..... ..... | ..... ..... | ..... ..... | ..... ..... |
|                       | 250         | 260         | 270         | 280         | 290         | 300         |
| <b>HCIC621-05-W4A</b> | CCTCCTAGGC  | AAAAAAGTAT  | AGTAT--AAA  | GTGTTT-GTG  | TGT--GTTAC  | ACATTACACA  |
| <b>HCIC644-05-W4A</b> | CCTCCTAGGC  | AAAAAAGTAT  | AGTAT--AAA  | GTGTTT-GTG  | TGT--GTTAC  | ACATTACACA  |
| <b>HCIC658-05-W4A</b> | CCTCCTAGGC  | AAAAAAGTAT  | AGTAT--AAA  | GTGTTT-GTG  | TGT--GTTAC  | ACATTACACA  |
| <b>HCIC246-05-W4B</b> | CCTCCTAGGC  | AAAAAAGTAT  | AGTATATAAA  | GTGTTT-GTG  | TGTGTGTTAC  | ACCTTACACA  |
| <b>HCIC252-05-W4B</b> | CCTCCTAGGC  | AAAAAAGTAT  | AGTATATAAA  | GTGTTT-GTG  | TGTGTGTTAC  | ACCTTACACA  |
| <b>HCIC608-05-W4B</b> | CCTCCTAGGC  | AAAAAAGTAT  | AGTATATAAA  | GTGTTT-GTG  | TGTGTGTTAC  | ACCTTACACA  |
| <b>HCIC554-05-W4D</b> | CCTCCTAGGC  | AAAAAAGTAT  | AGTATA--AA  | GTGTTTTGTG  | TGT--GTTAC  | ACATTACACA  |
| <b>HCIC539-05-W4D</b> | CCTCCTAGGC  | AAAAAAGTAT  | AGTATA--AA  | GTGTTTTGTG  | TGT--GTTAC  | ACATTACACA  |
| <b>HCIC540-05-W4D</b> | CCTCCTAGGC  | AAAAAAGTAT  | AGTATA--AA  | GTGTTTTGTG  | TGT--GTTAC  | ACATTACACA  |
| <b>HCIC536-05-W4C</b> | CCTCCTAGGC  | AAAAA-GTAN  | A-TATACAAT  | ACTTCTT---  | -ATATTGTAA  | AATTATGGCA  |
| <b>HCIC533-05-W4C</b> | CCTCCTAGGC  | AAAAA-GTAT  | A-TATACAAT  | ACTTCTT---  | -ATATTGTAA  | AATTATGGCA  |
| <b>HCIC535-05-W4C</b> | CCTCCTAGGC  | AAAAA-GTAT  | A-TATACAAT  | ACTTCTT---  | -ATATTGTAA  | AATTATGGCA  |

|                       |             |             |             |             |             |             |
|-----------------------|-------------|-------------|-------------|-------------|-------------|-------------|
|                       | ..... ..... | ..... ..... | ..... ..... | ..... ..... | ..... ..... | ..... ..... |
|                       | 310         | 320         | 330         | 340         | 350         | 360         |
| <b>HCIC621-05-W4A</b> | AA-----     | -----       | -----A      | ATTGACTTAT  | TTATATAAAA  | TTTGTAAAAA  |
| <b>HCIC644-05-W4A</b> | AA-----     | -----       | -----A      | ATTGACTTAT  | TTATATAAAA  | TTTGTAAAAA  |
| <b>HCIC658-05-W4A</b> | AA-----     | -----       | -----A      | ATTGACTTAT  | TTATATAAAA  | TTTGTAAAAA  |
| <b>HCIC246-05-W4B</b> | AA-----     | -----       | -----A      | AATTACTTAT  | TTATCTAAAA  | TTTGTAAAAA  |
| <b>HCIC252-05-W4B</b> | AA-----     | -----       | -----A      | AATTACTTAT  | TTATCTAAAA  | TTTGTAAAAA  |
| <b>HCIC608-05-W4B</b> | AA-----     | -----       | -----A      | AATTACTTAT  | TTATCTAAAA  | TTTGTAAAAA  |
| <b>HCIC554-05-W4D</b> | AA-----     | -----       | -----A      | AATTCCTTAT  | TTATATAAAA  | TTTGTAAAAA  |
| <b>HCIC539-05-W4D</b> | AA-----     | -----       | -----A      | AATTCCTTAT  | TTATATAAAA  | TTTGTAAAAA  |
| <b>HCIC540-05-W4D</b> | AA-----     | -----       | -----A      | AATTCCTTAT  | TTATATAAAA  | TTTGTAAAAA  |
| <b>HCIC536-05-W4C</b> | AAAAGAAACA  | AAATAACAAT  | AATAAAATGT  | TTATTATTGT  | ATCGCCTCCT  | AGGCAAAAAA  |
| <b>HCIC533-05-W4C</b> | AAAAGAAACA  | AAATAACAAT  | AATAAAATGT  | TTATTATTGT  | ATCGCCTCCT  | AGGCAAAAAA  |
| <b>HCIC535-05-W4C</b> | AAAAGAAACA  | AAATAACAAT  | AATAAAATGT  | TTATTATTGT  | ATCGCCTCCT  | AGGCAAAAAA  |

|                       |             |             |             |             |             |             |
|-----------------------|-------------|-------------|-------------|-------------|-------------|-------------|
|                       | ..... ..... | ..... ..... | ..... ..... | ..... ..... | ..... ..... | ..... ..... |
|                       | 370         | 380         | 390         | 400         | 410         | 420         |
| <b>HCIC621-05-W4A</b> | CTGAAATTGT  | GTGGAC---G  | TTATACAAAA  | TTA-----AT  | TTGTATAGAA  | AATGTCTAAA  |
| <b>HCIC644-05-W4A</b> | CTGAAATTGT  | GTGGAC---G  | TTATACNAAA  | TTA-----AT  | TTGTATAGAA  | AATGTCTAAA  |
| <b>HCIC658-05-W4A</b> | CTGAAATTGT  | GTGGAC---G  | TTATACAAAA  | TTA-----AT  | TTGTATAGAA  | AATGTCTAAA  |
| <b>HCIC246-05-W4B</b> | CTGAAATTGT  | GTGGACGTTG  | TTATACAAAA  | TTA-----AT  | TTGTATACAA  | AATGTCTAAA  |
| <b>HCIC252-05-W4B</b> | CTGAAATTGT  | GTGGACGTTG  | TTATACAAAA  | TTA-----AT  | TTGTATACAA  | AATGTCTAAA  |
| <b>HCIC608-05-W4B</b> | CTGAAATTGT  | GTGGACGTTG  | TTATACAAAA  | TTA-----AT  | TTGTATACAA  | AATGTCTAAA  |
| <b>HCIC554-05-W4D</b> | TTGAAATTGT  | GTGGAC-ATA  | TTATATCAAA  | TTA-----AT  | TTGTATACAA  | AATGTCTAAA  |
| <b>HCIC539-05-W4D</b> | TTGAAATTGT  | GTGGAC-AT-  | -TATATCAAA  | TTA-----AT  | TTGTNTACAA  | AATGTCTAAA  |
| <b>HCIC540-05-W4D</b> | TTGAAATTGT  | GTGGAC-AT-  | -TATATCAAA  | TTA-----AT  | TTGTATACAA  | AATGTCTAAA  |
| <b>HCIC536-05-W4C</b> | GTATATATAA  | AATAC--TTA  | TATTGTAAAA  | TTATGGCAAA  | TGGCAAAAAG  | AAACAAAATA  |
| <b>HCIC533-05-W4C</b> | GTATATATAA  | AATAC--TTA  | TATTGTAAAA  | TTATGGCAAA  | TGGCAAAAAG  | AAACAAAATA  |
| <b>HCIC535-05-W4C</b> | GTATATATAA  | AATAC--TTA  | TATTGTAAAA  | TTATGGCAAA  | TGGCAAAAAG  | AAACAAAATA  |

|                       |             |             |             |             |             |             |
|-----------------------|-------------|-------------|-------------|-------------|-------------|-------------|
|                       | ..... ..... | ..... ..... | ..... ..... | ..... ..... | ..... ..... | ..... ..... |
|                       | 430         | 440         | 450         | 460         | 470         | 480         |
| <b>HCIC621-05-W4A</b> | AATTTGAAAT  | ACATAAAAATT | ATAGTTGTAC  | TTGTATAAAA  | TTGAAAAGTA  | ATTTTTTATA  |
| <b>HCIC644-05-W4A</b> | AATTTGAAAT  | ACATAAAAATT | ATAGTTGTAC  | TTGTATAAAA  | TTGAAAAGTA  | ATTTTTTATA  |
| <b>HCIC658-05-W4A</b> | AATTTGAAAT  | ACATAAAAATT | ATAGTTGTAC  | TTGTATAAAA  | TTGAAAAGTA  | ATTTTTTATA  |
| <b>HCIC246-05-W4B</b> | AATTTGAAAT  | ACATAAAAATT | ATAGTTGTAC  | TTGTATAAAA  | TTGAAAAGTA  | ATTTT--ATA  |
| <b>HCIC252-05-W4B</b> | AATTTGAAAT  | ACATAAAAATT | ATAGTTGTAC  | TTGTATAAAA  | TTGAAAAGTA  | ATTTT--ATA  |
| <b>HCIC608-05-W4B</b> | AATTTGAAAT  | ACATAAAAATT | ATAGTTGTAC  | TTGTATAAAA  | TTGAAAAGTA  | ATTTT--ATA  |
| <b>HCIC554-05-W4D</b> | AATTTGAAAT  | ACATAAAAATT | ATAGTTGTAC  | TTGTATAAAA  | TTGAAAAGTA  | ATTTT--ATA  |
| <b>HCIC539-05-W4D</b> | AATTTGAAAT  | ACATAAAAATT | ATAGTTGTAC  | TTGTATAAAA  | TTGAAAAGTA  | ATTTT--ATA  |
| <b>HCIC540-05-W4D</b> | AATTTGAAAT  | ACATAAAAATT | ATAGTTGTAC  | TTGTATAAAA  | TTGAAAAGTA  | ATTTT--ATA  |
| <b>HCIC536-05-W4C</b> | AATTTGAAAT  | ACATAAAAATT | ATAGTTGTAC  | TTGTATAAAA  | TTGAAAAGTA  | ATTTT--ATA  |
| <b>HCIC533-05-W4C</b> | AATTTGAAAT  | ACATAAAAATT | ATAGTTGTAC  | TTGTATAAAA  | TTGAAAAGTA  | ATTTT--ATA  |
| <b>HCIC535-05-W4C</b> | AATTTGAAAT  | ACATAAAAATT | ATAGTTGTAC  | TTGTATAAAA  | TTGAAAAGTA  | ATTTT--ATA  |

```
.....|.....| .....|.....| .....|.....| .....|.....| .....|.....|
          490          500          510          520          530          540
HCIC621-05-W4A TAAGTCAATC ATTGTTTCGTT TTTTAAGAAC TTGAGACATT CGCAACAAAA ATTTTATGTT
HCIC644-05-W4A TAAGTCAATC ATTGTTTCGTT TTTTAAGAAC TTGAGACATT CGCAACAAAA ATTTTATGTT
HCIC658-05-W4A TAAGTCAATC ATTGTTTCGTT TTTTAAGAAC TTGAGACATT CGCAACAAAA ATTTTATGTT
HCIC246-05-W4B TAAGTCAATC ATTGTTCTTT -TTTAAGAAC TTGAGACATT CGCAACAAAA ATTTTATGTT
HCIC252-05-W4B TAAGTCAATC ATTGTTCTTT -TTTAAGAAC TTGAGACATT CGCAACAAAA ATTTTATGTT
HCIC608-05-W4B TAAGTCAATC ATTGTTCTTT -TTTAAGAAC TTGAGACATT CGCAACAAAA ATTTTATGTT
HCIC554-05-W4D TAAGTCAATC ATTGTTCTTT TTTTAAGAAC TTGAGACATT CGCAACAAAA ATTTTATGTT
HCIC539-05-W4D TAAGTCAATC ATTGTTCTTT TTTTAAGAAC TTGAGACATT CGCAACAAAA ATTTTATGTT
HCIC540-05-W4D TAAGTCAATC ATTGTTCTTT TTTTAAGAAC TTGAGACATT CGCAACAAAA ATTTTATGTT
HCIC536-05-W4C -AAGTCAATC ATTGTTCTTT TTTTAAGAAC TTGAGACATT CGCAACAAAA ATTTTATGTT
HCIC533-05-W4C -AAGTCAATC ATTGTTCTTT TTTTAAGAAC TTGAGACATT CGCAACAAAA ATTTTATGTT
HCIC535-05-W4C -AAGTCAATC ATTGTTCTTT TTTTAAGAAC TTGAGACATT CGCAACAAAA ATTTTATGTT
```

```
.....|.....| .....|.....| .....|.....| .....|.....| .....|.....|
          550          560          570          580          590          600
HCIC621-05-W4A TTAGTTATAA AAGAGAAGAA TAATAAGCAA AAATTATTGA AGGAATTGAT ATATGCCAAT
HCIC644-05-W4A TTAGTTATAA AAGAGAAGAA TAATAAGCAA AAATTATTGA AGGAATTGAT ATATGCCAAT
HCIC658-05-W4A TTAGTTATAA AAGAGAAGAA TAATAAGCAA AAATTATTGA AGGAATTGAT ATATGCCAAT
HCIC246-05-W4B TTAATTATAA AAGAGAAGAA TAATAAGCAA AAATTATTGA AGGAATTGAT ATATGCCAAT
HCIC252-05-W4B TTAATTATAA AAGAGAAGAA TAATAAGCAA AAATTATTGA AGGAATTGAT ATATGCCAAT
HCIC608-05-W4B TTAATTATAA AAGAGAAGAA TAATAAGCAA AAATTATTGA AGGAATTGAT ATATGCCAAT
HCIC554-05-W4D TTAATTATAA AAGAGAATAA TAATAAGCAA AAATTATTGA AGGAATTGAT ATATGCCAAT
HCIC539-05-W4D TTAATTATAA AAGAGAATAA TAATAAGCAA AAATTATTGA AGGAATTGAT ATATGCCAAT
HCIC540-05-W4D TTAATTATAA AAGAGAATAA TAATAAGCAA AAATTATTGA AGGAATTGAT ATATGCCAAT
HCIC536-05-W4C TTAATTATAA AAGAGAATAA TAATAAGCAA AAATTATTGA AGGAATTGAT ATATGCCAAT
HCIC533-05-W4C TTAATTATAA AAGAGAATAA TAATAAGCAA AAATTATTGA AGGAATTGAT ATATGCCAAT
HCIC535-05-W4C TTAATTATAA AAGAGAATAA TAATAAGCAA AAATTATTGA AGGAATTGAT ATATGCCAAT
```

```
.....|.....| .....|.....| .....|.....| .....|.....| .....|.....|
          610          620          630          640          650          660
HCIC621-05-W4A TTGAAACTTT TTGGTGTATT TTTGATTTCT -----
HCIC644-05-W4A TTGAAACTTT TTGGTGTATT TTTGATTTCT TTCAATAAAT ATATATATNA AATGCTATTG
HCIC658-05-W4A TTGAAAC--- -----
HCIC246-05-W4B TTGAAAATTG TTGGTGTATT TTTGATTTCT TTCAATAAAT ATATATATGA AATGCTATTG
HCIC252-05-W4B TTGAAAATTG TTGGTGTATT TTTGATTTCT TTCAATAAAT ATATATATGA AATGCTATTG
HCIC608-05-W4B TTGAAAATTG TTGGTGTATT TTTGATTTCT TTCNNTAAAT ATATATATGA NATGCTANTG
HCIC554-05-W4D TTGAAAATTT TTGGTGTATT TTTGATTTCT TTCAATAAAT ATATATATGA NGTGCTATTG
HCIC539-05-W4D TTGAAAATTT TTGGTGTATT TTTGATTTCT TTCAATAAAT ATATATATGA AGTGCTATTG
HCIC540-05-W4D TTGAAAATTT TTGGTGTATT TTTGATTTCT TTCAATAAAT ATATATATGA AGTGCTATTG
HCIC536-05-W4C TTGAAAATTT TTGGTGTATT TTTGATTTCT TTCAATAAAT ATATATATGA AATGCTATTG
HCIC533-05-W4C TTGAAAATTT TTGGTGTATT TTTGATTTCT TTCAATAAAT ATATATATGA AATGCTATNG
HCIC535-05-W4C TTGAAAATTT TTGGTGTATT TTTGATTTCT TTCAATAAAT ATATATATGA AATGCTATTG
```

```
.....|.....| .....|.....| .....|.....| .....|.....| .....|.....|
          670          680          690          700          710          720
HCIC621-05-W4A -----
HCIC644-05-W4A AAAATAAAAA TTATATCNCT CTATACGGTG GATCACTTGG CTCATGGGTC GATGAAGAAC
HCIC658-05-W4A -----
HCIC246-05-W4B AAAATAAAAA TTATATCACT CTAA-----
HCIC252-05-W4B AAAATAAAAA TTATATCACT CTAAGCGGTG GATCACTTGG CTCATGGGTC GATGAAGAAC
HCIC608-05-W4B AAAATAAAAA TTATATCACT CT-----
HCIC554-05-W4D AAAATAAAAA TTATATCACT CTAAGCGGTG GATCACTTGG CTCATGGGTC GA-----
HCIC539-05-W4D AAAATAAAAA TTATATCACT CTAAGCGGTG GATCACTTGG CTCATGGGTC G-----
HCIC540-05-W4D AAAATAAAAA TTATATCACT CTAAGCGGTG GATCACTTGG CTCATGGGTC GATGAA----
HCIC536-05-W4C AAAATAAAAA TTATATCACT CTAAGCGGTG GATCACTTGG CTCATGGGTC GATGAAGAAC
HCIC533-05-W4C AAAATAAAAA TTATATCACT CTAAGCGGTG GATCACTTGG CTCATGGGTC GATGAAGAAC
HCIC535-05-W4C AAAATAAAAA TTATATCACT CTAAGCGGTG GATCACTTGG CTCATGGGTC GATGAAGAAC
```

.....|...

|                |          |
|----------------|----------|
| HCIC621-05-W4A | -----    |
| HCIC644-05-W4A | GCA----- |
| HCIC658-05-W4A | -----    |
| HCIC246-05-W4B | -----    |
| HCIC252-05-W4B | GCAGCAAA |
| HCIC608-05-W4B | -----    |
| HCIC554-05-W4D | -----    |
| HCIC539-05-W4D | -----    |
| HCIC540-05-W4D | -----    |
| HCIC536-05-W4C | GCAGCAAA |
| HCIC533-05-W4C | GCAGCAAA |
| HCIC535-05-W4C | GCAGCAAA |
